# Supplementary material for: Alignment-free method for DNA sequence clustering using Fuzzy integral similarity
Source: PubMed Central journal article supplement (PMC6403383; doi:10.1038/s41598-019-40452-6), 2019-03-06
Supplement: 41598_2019_40452_MOESM1_ESM.pdf [file 41598_2019_40452_MOESM1_ESM.pdf]

# Alignment-free method for DNA sequence clustering using Fuzzy integral similarity

Ajay Kumar Saw<sup>1</sup>, Garima Raj<sup>2</sup>, Manashi Das<sup>3</sup>, Narayan C. Talukdar<sup>4</sup>, Binod Chandra Tripathy<sup>5</sup> and Soumyadeep Nandi<sup>6,\*</sup>

<sup>1</sup> Mathematical Sciences Division, Institute of Advanced Study in Science and Technology, Guwahati-35, India.

<sup>2,3,4,6</sup> Life Science Division, Institute of Advanced Study in Science and Technology, Guwahati-35, India.

<sup>5</sup> Mathematics Department, Tripura University, Tripura, India.

\* To whom correspondence should be addressed. Email: [soumyadeep.nandi@gmail.com](mailto:soumyadeep.nandi@gmail.com); [snandi@iasst.gov.in](mailto:snandi@iasst.gov.in)

## Supplementary material (Tables)

**Table S1: Information of the 11 Arbuscular mycorrhizal fungus(AMF) isolates.**

| Accession | Abbreviation | Division      | Family        | Genus        | Name                        | length |
|-----------|--------------|---------------|---------------|--------------|-----------------------------|--------|
| MF185110  | 4 Rhi in     | Glomeromycota | Glomeraceae   | Rhizophagus  | Rhizophagus intraradices    | 282    |
| MF185111  | 10 Gl spp    | Glomeromycota | Glomeraceae   | Glomus       | Glomus spp                  | 235    |
| MF185112  | 11 Rhi cl    | Glomeromycota | Glomeraceae   | Rhizophagus  | Rhizophagus clarus          | 288    |
| MF185113  | 12 Gi ma     | Glomeromycota | Gigasporaceae | Gigaspora    | Gigaspora margarita         | 307    |
| MF185114  | 13 Gi gi     | Glomeromycota | Gigasporaceae | Gigaspora    | Gigaspora gigantea          | 332    |
| MF185115  | 14 Glo sp    | Glomeromycota | Glomeraceae   | Glomus       | Glomus Sp                   | 336    |
| MF185116  | 15 Rhi in    | Glomeromycota | Glomeraceae   | Rhizophagus  | Rhizophagus intraradices    | 300    |
| MF185117  | 16 Glo sp    | Glomeromycota | Glomeraceae   | Glomus       | Glomus sp                   | 216    |
| MF185119  | 18 Glo sp    | Glomeromycota | Glomeraceae   | Glomus       | Glomus sp                   | 297    |
| MF185109  | 1 Uncl glu   | Glomeromycota | Unclassified  | Unclassified | Uncultured Glomeromycota sp | 282    |
| MF185118  | 17 Glomer    | Glomeromycota | Unclassified  | Unclassified | Uncultured Glomeromycota sp | 290    |

**Table S2: Information of the 16S rDNA sequences of 40 bacterial isolates.**

| Sample IDs ( Accession) | closest strain                          | phylum         | class               | order             | family              | length |
|-------------------------|-----------------------------------------|----------------|---------------------|-------------------|---------------------|--------|
| KJ 2 (KY486204)         | Methylobacterium indicum strain SE2.11  | Proteobacteria | Alphaproteobacteria | Rhizobiales       | Methylobacteriaceae | 1104   |
| KJ 3 (KY486205)         | Xanthomonas sacchari LMG 471            | Proteobacteria | Gammaproteobacteria | Xanthomonadales   | Xanthomonadaceae    | 761    |
| KJ 5 (KY486206)         | Xanthomonas sacchari LMG 471            | Proteobacteria | Gammaproteobacteria | Xanthomonadales   | Xanthomonadaceae    | 1452   |
| KJ 6 (KY486207)         | Knoellia flava TL1                      | actinobacteria | Actinobacteridae    | Actinomycetales   | Intrasporangiaceae  | 1253   |
| KJ 34 (KY486218)        | Microbacterium proteolyticum            | actinobacteria | Actinobacteridae    | Actinomycetales   | Microbacteriaceae   | 1195   |
| KJ 35 (KY486219)        | Pseudomonas oryzae habitans NBRC 102199 | Proteobacteria | Gammaproteobacteria | Pseudomonadales   | Pseudomonadaceae    | 1099   |
| KJ 36 (KY927407)        | Bacillus marisflavi TF11                | Firmicutes     | Bacilli             | Bacillales        | Bacillaceae         | 718    |
| KJ 37 (KY486220)        | Brevibacillus borstelensis NBRC 15714   | Firmicutes     | Bacilli             | Bacillales        | Paenibacillaceae    | 1335   |
| KJ 38 (KY486221)        | Pantoea agglomerans DSM 3493            | Proteobacteria | Gammaproteobacteria | Enterobacteriales | Enterobacteriaceae  | 1339   |
| KJ 40 (KY486222)        | Xanthomonas sacchari LMG 471            | Proteobacteria | Gammaproteobacteria | Xanthomonadales   | Xanthomonadaceae    | 1337   |
| KJ 41 (KY486223)        | Curtobacterium luteum DSM 20542         | actinobacteria | Actinobacteridae    | Actinomycetales   | Microbacteriaceae   | 1334   |
| IDO 14 (KY486209)       | Luteibacter yeojuensis R2A16-10         | Proteobacteria | Gammaproteobacteria | Xanthomonadales   | Rhodanobacteriaceae | 1366   |
| IDO 15 (KY486210)       | Pantoea agglomerans DSM3493             | Proteobacteria | Gammaproteobacteria | Enterobacteriales | Enterobacteriaceae  | 1356   |
| IDO d10 (KY486232)      | Pantoea agglomerans DSM3493             | Proteobacteria | Gammaproteobacteria | Enterobacteriales | Enterobacteriaceae  | 1350   |
| IDO d21 (KY019246)      | Pantoea agglomerans DSM3493             | Proteobacteria | Gammaproteobacteria | Enterobacteriales | Enterobacteriaceae  | 1345   |
| IDO d5 (KY013009)       | Pantoea agglomerans DSM3493             | Proteobacteria | Gammaproteobacteria | Enterobacteriales | Enterobacteriaceae  | 1351   |
| IDO d6 (KY927404)       | Curtobacterium plantarum CL63           | actinobacteria | Actinobacteridae    | Actinomycetales   | Microbacteriaceae   | 742    |
| RN 17 (KY486211)        | Pantoea allii BD390                     | Proteobacteria | Gammaproteobacteria | Enterobacteriales | Enterobacteriaceae  | 1365   |
| RN d26 (KY013011)       | Staphylococcus warneri AW25             | Firmicutes     | Bacilli             | Bacillales        | Staphylococcaceae   | 1031   |
| RN d3 (KY019245)        | Pantoea agglomerans DSM3493             | Proteobacteria | Gammaproteobacteria | Enterobacteriales | Enterobacteriaceae  | 1345   |
| RN d17 (KY013010)       | Bacillus subtilis JCM1465               | Firmicutes     | Bacilli             | Bacillales        | Bacillaceae         | 1341   |
| FN 10 (KY486208)        | Pantoea agglomerans NBRC 102470         | Proteobacteria | Gammaproteobacteria | Enterobacteriales | Enterobacteriaceae  | 1269   |
| FN 23 (KY486212)        | Curtobacterium plantarum                | actinobacteria | Actinobacteridae    | Actinomycetales   | Microbacteriaceae   | 1364   |
| FN 24 (KY486213)        | Xanthomonas sacchari LMG471             | Proteobacteria | Gammaproteobacteria | Xanthomonadales   | Xanthomonadaceae    | 1387   |
| FN 48 (KY486228)        | Pantoea agglomerans DSM3493             | Proteobacteria | Gammaproteobacteria | Enterobacteriales | Enterobacteriaceae  | 1356   |
| KEK 42 (KY486224)       | Pantoea agglomerans DSM3493             | Proteobacteria | Gammaproteobacteria | Enterobacteriales | Enterobacteriaceae  | 1346   |
| KEK 44 (KY486225)       | Pantoea agglomerans DSM 3493            | Proteobacteria | Gammaproteobacteria | Enterobacteriales | Enterobacteriaceae  | 1294   |
| KEK 45 (KY486226)       | Pantoea agglomerans DSM 3493            | Proteobacteria | Gammaproteobacteria | Enterobacteriales | Enterobacteriaceae  | 1347   |

|                    |                                    |                |                     |                   |                    |      |
|--------------------|------------------------------------|----------------|---------------------|-------------------|--------------------|------|
| KEK 46 (KY927405)  | Pantoea anthophila LMG 2558        | Proteobacteria | Gammaproteobacteria | Enterobacteriales | Enterobacteriaceae | 753  |
| KEK 47 (KY486227)  | Pantoea agglomerans DSM 3493       | Proteobacteria | Gammaproteobacteria | Enterobacteriales | Enterobacteriaceae | 1345 |
| T KW 27 (KY927408) | Curtobacterium plantarum CL63      | actinobacteria | Actinobacteridae    | Actinomycetales   | Microbacteriaceae  | 785  |
| T KW 28 (KY486214) | Pantoea agglomerans DSM 3493       | Proteobacteria | Gammaproteobacteria | Enterobacteriales | Enterobacteriaceae | 1411 |
| T KW 29 (KY927406) | Curtobacterium plantarum CL63      | actinobacteria | Actinobacteridae    | Actinomycetales   | Microbacteriaceae  | 785  |
| T KW 31 (KY486215) | Pantoea agglomerans DSM 3493       | Proteobacteria | Gammaproteobacteria | Enterobacteriales | Enterobacteriaceae | 1319 |
| T KW 32 (KY486216) | Pantoea agglomerans DSM 3493       | Proteobacteria | Gammaproteobacteria | Enterobacteriales | Enterobacteriaceae | 1345 |
| T KW 33 (KY486217) | Pantoea agglomerans DSM 3493       | Proteobacteria | Gammaproteobacteria | Enterobacteriales | Enterobacteriaceae | 1341 |
| T KW 51 (KY486229) | Pantoea agglomerans DSM 3493       | Proteobacteria | Gammaproteobacteria | Enterobacteriales | Enterobacteriaceae | 1345 |
| T KW 52 (KY486230) | Pseudomonas psychrotolerans TPs-04 | Proteobacteria | Gammaproteobacteria | Pseudomonadales   | Pseudomonadaceae   | 1346 |
| T KW 53 (KY486231) | Pantoea agglomerans DSM 3493       | Proteobacteria | Gammaproteobacteria | Enterobacteriales | Enterobacteriaceae | 1322 |
| T KW 56 (KY019244) | Pantoea agglomerans DSM 3493       | Proteobacteria | Gammaproteobacteria | Enterobacteriales | Enterobacteriaceae | 1325 |

**Table S3: Information of the 41 mammalian genomes**

| Accession Number | Abbreviation   | Description        | Genome Length<br>(bp) |
|------------------|----------------|--------------------|-----------------------|
| V00662           | Human          | Human              | 16569                 |
| D38116           | Pig_Chim       | Pigmy chimpanzee   | 16563                 |
| D38113           | Com_Chim       | Common chimpanzee  | 16554                 |
| D38114           | Gorilla        | Gorilla            | 16472                 |
| X99256           | Gibbon         | Gibbon             | 16521                 |
| Y18001           | Baboon         | Baboon             | 16389                 |
| AY863426         | Ver_Monkey     | Vervet monkey      | 16586                 |
| D38115           | Bor_Oran       | Bornean orangutan  | 16389                 |
| NC_002083        | Sum_Oran       | Sumatran orangutan | 16499                 |
| U20753           | Cat            | Cat                | 16364                 |
| U96639           | Dog            | Dog                | 17009                 |
| AJ002189         | Pig            | Pig                | 16727                 |
| AF010406         | Sheep          | Sheep              | 16680                 |
| AF533441         | Goat           | Goat               | 16616                 |
| V00654           | Cow            | Cow                | 16640                 |
| AY488491         | Buffalo        | Buffalo            | 16338                 |
| EU442884         | Wolf           | Wolf               | 16355                 |
| EF551003         | Tiger          | Tiger              | 16774                 |
| EF551002         | Leopard        | Leopard            | 16990                 |
| X97336           | Indian_Rhino   | Indian Rhinoceros  | 16964                 |
| Y07726           | White_Rhino    | White Rhinoceros   | 16829                 |
| DQ402478         | Black_Bear     | Black Bear         | 16832                 |
| AF303110         | Brown_Bear     | Brown Bear         | 16868                 |
| AF303111         | Polar_Bear     | Polar Bear         | 17020                 |
| EF212882         | Giant_Panda    | Giant Panda        | 17017                 |
| AJ001588         | Rabbit         | Rabbit             | 16805                 |
| X88898           | Hedgehog       | Hedgehog           | 17245                 |
| NC_002764        | Macaca_Thibet  | Macaca Thibet      | 17447                 |
| AJ238588         | Squirrel       | Squirrel           | 16602                 |
| AJ001562         | Dormouse       | Dormouse           | 16507                 |
| X72204           | Blue_Whale     | Blue whale         | 16402                 |
| NC_005268        | Bowhead Whale  | Bowhead Whale      | 16390                 |
| NC_007441        | chiru          | chiru              | 16498                 |
| NC_008830        | Common warthog | Common warthog     | 16719                 |

|           |                              |                                 |       |
|-----------|------------------------------|---------------------------------|-------|
| NC_001788 | donkey                       | donkey                          | 16670 |
| NC_001321 | Fin Whale                    | Fin Whale                       | 16398 |
| NC_005270 | Gray Whale                   | Gray Whale                      | 16412 |
| NC_001640 | horse                        | horse                           | 16660 |
| NC_005275 | Indus River<br>Dolphin       | Indus River<br>Dolphin          | 16324 |
| NC_006931 | North Pacific<br>Right Whale | North Pacific<br>Right<br>Whale | 16386 |
| NC_010640 | Taiwan serow                 | Taiwan serow                    | 16524 |

**Table S4: Accession number of 59 ebolaviruses**

| <b>Accession Number</b> | <b>Species</b>      | <b>Genome Length (bp)</b> |
|-------------------------|---------------------|---------------------------|
| FJ217161                | BDBV_2007_FJ217161  | 18941                     |
| KC545393                | BDBV_2012_KC545393  | 18940                     |
| KC545395                | BDBV_2012_KC545395  | 18939                     |
| KC545394                | BDBV_2012_KC545394  | 18938                     |
| KC545396                | BDBV_2012_KC545396  | 18937                     |
| FJ217162                | TAFV_1994_FJ217162  | 18936                     |
| AF522874                | RESTV_1990_AF522874 | 18935                     |
| AB050936                | RESTV_1996_AB050936 | 18934                     |
| JX477166                | RESTV_1996_JX477166 | 18933                     |
| FJ621585                | RESTV_2008_FJ621585 | 18932                     |
| FJ621583                | RESTV_2008_FJ621583 | 18931                     |
| JX477165                | RESTV_2009_JX477165 | 18930                     |
| FJ968794                | SUDV_1976_FJ968794  | 18929                     |
| KC242783                | SUDV_1979_KC242783  | 18928                     |
| EU338380                | SUDV_2004_EU338380  | 18927                     |
| AY729654                | SUDV_2000_AY729654  | 18926                     |
| JN638998                | SUDV_2011_JN638998  | 18925                     |
| KC545389                | SUDV_2012_KC545389  | 18924                     |
| KC545390                | SUDV_2012_KC545390  | 18923                     |

|           |                    |       |
|-----------|--------------------|-------|
| KC545391  | SUDV_2012_KC545391 | 18922 |
| KC545392  | SUDV_2012_KC545392 | 18921 |
| KC589025  | SUDV_2012_KC589025 | 18920 |
| KC242801  | EBOV_1976_KC242801 | 18919 |
| NC_002549 | EBOV_1976_NC002549 | 18918 |
| KC242791  | EBOV_1977_KC242791 | 18917 |
| KC242792  | EBOV_1994_KC242792 | 18916 |
| KC242793  | EBOV_1996_KC242793 | 18915 |
| KC242794  | EBOV_1996_KC242794 | 18914 |
| AY354458  | EBOV_1995_AY354458 | 18913 |
| KC242796  | EBOV_1995_KC242796 | 18912 |
| KC242799  | EBOV_1995_KC242799 | 18911 |
| KC242784  | EBOV_2007_KC242784 | 18910 |
| KC242786  | EBOV_2007_KC242786 | 18909 |
| KC242787  | EBOV_2007_KC242787 | 18908 |
| KC242789  | EBOV_2007_KC242789 | 18907 |
| KC242785  | EBOV_2007_KC242785 | 18906 |
| KC242790  | EBOV_2007_KC242790 | 18905 |
| KC242788  | EBOV_2007_KC242788 | 18904 |
| KC242800  | EBOV_2002_KC242800 | 18903 |
| KM034555  | EBOV_2014_G3676    | 18902 |
| KM034562  | EBOV_2014_G3686    | 18901 |
| KM233039  | EBOV_2014_EM112    | 18900 |
| KM034557  | EBOV_2014_G3677    | 18899 |
| KM034560  | EBOV_2014_G3682    | 18898 |
| KM233050  | EBOV_2014_G3713    | 18897 |
| KM233053  | EBOV_2014_G3724    | 18896 |
| KM233057  | EBOV_2014_G3735    | 18895 |
| KM233063  | EBOV_2014_G3764    | 18894 |

|          |                    |       |
|----------|--------------------|-------|
| KM233072 | EBOV_2014_G3782    | 18893 |
| KM233110 | EBOV_2014_G3848    | 18892 |
| KM233070 | EBOV_2014_G3770    | 18891 |
| KM233099 | EBOV_2014_G3825    | 18890 |
| KM233097 | EBOV_2014_G3823    | 18889 |
| KM233109 | EBOV_2014_G3846    | 18888 |
| KM233096 | EBOV_2014_G3822    | 18887 |
| KM233103 | EBOV_2014_G3831    | 18886 |
| KJ660346 | EBOV_2014_KJ660346 | 18885 |
| KJ660347 | EBOV_2014_KJ660347 | 18884 |
| KJ660348 | EBOV_2014_KJ660348 | 18883 |

**Table S5: Information of the 30 coronavirus genomes and the four outgroup genomes**

| <b>Accession Number</b> | <b>Abbreviation</b> | <b>Description</b>                               | <b>Length (bp)</b> |
|-------------------------|---------------------|--------------------------------------------------|--------------------|
| AF304460                | 1 HCoV-229E         | Human coronavirus 229E, Group 1                  | 27317              |
| AF353511                | 1 PEDV              | Porcine epidemic diarrhea virus strain, Group 1  | 28033              |
| NC_005831               | 1 HCoV-NL63         | Human coronavirus NL63, Group 1                  | 27553              |
| AY391777                | 2 HCoV-OC43         | Human coronavirus OC43, Group 2                  | 30738              |
| U00735                  | 2 BCoV              | Bovine coronavirus strain Mebus, Group 2         | 31032              |
| AF391542                | 2 BCoV              | Bovine coronavirus isolate BCoV-LUN, Group 2     | 31028              |
| AF220295                | 2 BCoV              | Bovine coronavirus strain Quebec, Group 2        | 31100              |
| NC_003045               | 2 BCoV              | Bovine coronavirus, Group 2                      | 31028              |
| AF208067                | 2 MHV               | Murine hepatitis virus strain ML-10, Group 2     | 31233              |
| AF201929                | 2 MHV               | Murine hepatitis virus strain 2, Group 2         | 31276              |
| AF208066                | 2 MHV               | Murine hepatitis virus strain Penn 97-1, Group 2 | 31112              |
| NC_001846               | 2 MHV               | Murine hepatitis virus, Group 2                  | 31357              |
| NC_001451               | 3 IBV               | Avian infectious bronchitis virus, Group 3       | 27608              |
| EU095850                | 3 TCoV              | Turkey coronavirus isolate MG10, Group 3         | 27657              |
| AY278488                | 4 BJ01              | SARS coronavirus BJ01, Group 4                   | 29725              |
| AY278741                | 4 Urbani            | SARS coronavirus Urbani, Group 4                 | 29727              |
| AY278491                | 4 HKU-39849         | SARS coronavirus HKU-39849, Group 4              | 29742              |
| AY278554                | 4 CUHK-W1           | SARS coronavirus CUHK-W1, Group 4                | 29736              |
| AY282752                | 4 CUHK-Su10         | SARS coronavirus CUHK-Su10, Group 4              | 29736              |
| AY283794                | 4 SIN2500           | SARS coronavirus isolate SIN2500, Group 4        | 29711              |
| AY283795                | 4 SIN2677           | SARS coronavirus isolate SIN2677, Group 4        | 29705              |
| AY283796                | 4 SIN2679           | SARS coronavirus isolate SIN2679, Group 4        | 29711              |
| AY283797                | 4 SIN2748           | SARS coronavirus isolate SIN2748, Group 4        | 29706              |
| AY283798                | 4 SIN2774           | SARS coronavirus isolate SIN2774, Group 4        | 29711              |
| AY291451                | 4 TW1               | SARS coronavirus TW1, Group 4                    | 29729              |
| NC_004718               | 4 TOR2              | SARS coronavirus TOR2, Group 4                   | 29751              |
| AY297028                | 4 ZJ01              | SARS coronavirus ZJ01, Group 4                   | 29715              |

|           |             |                                                       |       |
|-----------|-------------|-------------------------------------------------------|-------|
| AY572034  | 4 Civet007  | SARS coronavirus civet007, Group 4                    | 29540 |
| AY572035  | 4 Civet010  | SARS coronavirus civet010, Group 4                    | 29518 |
| NC 006577 | 5 HCoV-HKU1 | Human coronavirus HKU1, Group 5                       | 29926 |
| NC 001564 | out CellF   | Cell fusing agent virus, <i>Flaviviridae</i> outgroup | 10695 |
| NC 004102 | out HepaCF  | Hepatitis C virus, <i>Flaviviridae</i> outgroup       | 9646  |
| NC 001512 | out NyongT  | O'nyong-nyong virus, <i>Togaviridae</i> outgroup      | 11835 |
| NC 001544 | out RossT   | Ross River virus, <i>Togaviridae</i> outgroup         | 11657 |

**Table S6: Information of the 30 bacterial genomes**

| Family              | Species                                       | Accession number | Genome Length(bp) |
|---------------------|-----------------------------------------------|------------------|-------------------|
| Bacillaceae         | Bacillus anthracis str. A0248                 | CP001598.1       | 4983359           |
| Bacillaceae         | Bacillus anthracis str. Ames                  | AE016879.1       | 5062406           |
| Bacillaceae         | Bacillus anthracis str. CDC 684               | CP001215.1       | 5141453           |
| Bacillaceae         | Bacillus anthracis str. Sterne                | AE017225.1       | 5220500           |
| Borreliaceae        | Borrelia duttonii Ly                          | CP000976.1       | 4904312           |
| Borreliaceae        | Borrelia hermsii DAH                          | CP000048.1       | 5299547           |
| Borreliaceae        | Borrelia recurrentis A1                       | CP000993.1       | 5378594           |
| Borreliaceae        | Borrelia turicatae 91E135                     | CP000049.1       | 5457641           |
| Clostridiaceae      | Clostridium perfringens ATCC 13124            | CP000246.1       | 5536688           |
| Clostridiaceae      | Clostridium perfringens SM101                 | CP000312.1       | 5615735           |
| Clostridiaceae      | Clostridium perfringens str. 13 DNA           | BA000016.3       | 5694782           |
| Desulfovibrionaceae | Desulfovibrio vulgaris DP4                    | CP000527.1       | 5773829           |
| Desulfovibrionaceae | Desulfovibrio vulgaris Hildenborough          | AE017285.1       | 5931923           |
| Desulfovibrionaceae | Desulfovibrio vulgaris RCH1                   | CP002297.1       | 5852876           |
| Burkholderiaceae    | Ralstonia eutropha H16                        | AM260480.1       | 6722393           |
| Burkholderiaceae    | Ralstonia eutropha JMP134                     | CP000091.1       | 6801440           |
| Rhodobacteraceae    | Rhodobacter sphaeroides ATCC 17029            | CP000578.1       | 6959534           |
| Rhodobacteraceae    | Rhodobacter sphaeroides KD131                 | CP001151.1       | 7038581           |
| Staphylococcaceae   | Staphylococcus carnosus subsp. carnosus TM300 | AM295250.1       | 7275722           |
| Staphylococcaceae   | Staphylococcus epidermidis ATCC 12228         | AE015929.1       | 7354769           |
| Staphylococcaceae   | Staphylococcus haemolyticus JCSC1435 DNA      | AP006716.1       | 7512863           |
| Staphylococcaceae   | Staphylococcus lugdunensis HKU09-01           | CP001837.1       | 7591910           |
| Yersiniaceae        | Yersinia pestis CO92                          | AL590842.1       | 7750004           |
| Yersiniaceae        | Yersinia pestis D106004                       | CP001585.1       | 7829051           |
| Yersiniaceae        | Yersinia pestis KIM10+                        | AE009952.1       | 7908098           |
| Yersiniaceae        | Yersinia pestis Z176003                       | CP001593.1       | 7987145           |
| Enterobacteriaceae  | Escherichia coli ABU 83972                    | CP001671.1       | 6327158           |
| Enterobacteriaceae  | Escherichia coli APEC O1                      | CP000468.1       | 6406205           |
| Enterobacteriaceae  | Shigella flexneri 2002017                     | CP001383.1       | 7117628           |
| Enterobacteriaceae  | Shigella flexneri 2a str. 301                 | AE005674.2       | 7196675           |

**Table S7: Information of the 48 Hepatitis E virus(HEV)**

| Strain name  | AC       | Genotype |
|--------------|----------|----------|
| B1(Bur-82)   | M73218   | I        |
| B2(Bur-86)   | D10330   | I        |
| I2(Mad-93)   | X99441   | I        |
| I3           | AF076239 | I        |
| NP1(TK15/92) | AF051830 | I        |
| P2(Abb-2B)   | AF185822 | I        |
| Yam-67       | AF459438 | I        |

|               |          |     |
|---------------|----------|-----|
| C1(CHT-88)    | D11092   | I   |
| C2(KS2-87)    | L25595   | I   |
| C3(CHT-87)    | L08816   | I   |
| C4(Uigh179)   | D11093   | I   |
| China Hebei   | M94177   | I   |
| P1(Sar-55)    | M80581   | I   |
| II(FHF)       | X98292   | I   |
| Morocco       | AY230202 | I   |
| T3            | AY204877 | I   |
| M1            | M74506   | II  |
| HE-JA10       | AB089824 | III |
| JKN-Sap       | AB074918 | III |
| JMY-HAW       | AB074920 | III |
| SW-US1        | AF082843 | III |
| US1           | AF060668 | III |
| US2           | AF060669 | III |
| ARKELL        | AY115488 | III |
| JBOAR1-HYO04  | AB189070 | III |
| JDEER-HYO03L  | AB189071 | III |
| JJT-KAN       | AB091394 | III |
| JMO-HYO03L    | AB189072 | III |
| JRA1          | AP003430 | III |
| JSO-HYO03L    | AB189073 | III |
| JTH-HYO03L    | AB189074 | III |
| JYO-HYO03L    | AB189075 | III |
| SWJ570        | AB073912 | III |
| KYRGYZ        | AF455784 | III |
| HE-JA1        | AB097812 | IV  |
| HE-JK4        | AB099347 | IV  |
| HE-JI4        | AB080575 | IV  |
| JAK-Sai       | AB074915 | IV  |
| JKK-SAP       | AB074917 | IV  |
| JSM-SAP95     | AB161717 | IV  |
| JSN-SAP-FH    | AB091395 | IV  |
| JSN-SAP-FH02C | AB200239 | IV  |
| JTS-SAP02     | AB161718 | IV  |
| JYW-SAP02     | AB161719 | IV  |
| SWJ13-1       | AB097811 | IV  |
| SWCH25        | AY594199 | IV  |
| T1            | AJ272108 | IV  |
| CCC220        | AB108537 | IV  |

**Table S8: Information of the 24 Eutherian mammal**

| No. | Sequence Name        | Species                         | Accession No. |
|-----|----------------------|---------------------------------|---------------|
| 1   | Rabbit TF            | <i>Oryctolagus coniculus</i>    | X58533        |
| 2   | Human TF             | <i>Homo sapien</i>              | S95936        |
| 3   | Cow TF               | <i>Bos Taurus</i>               | U02564        |
| 4   | Rat TF               | <i>Rattus norvegicus</i>        | D38380        |
| 5   | Mouse LF             | <i>Mus musculus</i>             | NM_008522     |
| 6   | Human LF             | <i>H. sapiens</i>               | NM_002343     |
| 7   | Goat LF              | <i>Capra hircus</i>             | X78902        |
| 8   | Buffalo LF           | <i>Bubalus arnee</i>            | AJ005203      |
| 9   | Cow LF               | <i>Bos Taurus</i>               | X57084        |
| 10  | Camel LF             | <i>Camelus dromedaries</i>      | AJ131674      |
| 11  | Pig LF               | <i>Sus scrofa</i>               | M92089        |
| 12  | Possum TF            | <i>Trichosurus vulpecula</i>    | AF092510      |
| 13  | Frog TF              | <i>Xenopus laevis</i>           | X54530        |
| 14  | Japanese flounder TF | <i>Paralichthys olivaceus</i>   | D88801        |
| 15  | Chinook salmon TF    | <i>Oncorhynchus tshawytscha</i> | AH008271      |
| 16  | Atlantic salmon TF   | <i>Salmo salar</i>              | L20313        |
| 17  | Brown trout TF       | <i>Salmo trutta</i>             | D89091        |
| 18  | Japanese char TF     | <i>Salvelinus pluvius</i>       | D89088        |
| 19  | Lake trout TF        | <i>Salvelinus namaycush</i>     | D89090        |
| 20  | Brook trout TF       | <i>Salvelinus fontinalis</i>    | D89089        |
| 21  | Amago salmon TF      | <i>Oncorhynchus masou</i>       | D89086        |
| 22  | Rainbow trout TF     | <i>Oncorhynchus mykiss</i>      | D89083        |
| 23  | Coho salmon TF       | <i>Oncorhynchus hisutch</i>     | D89084        |
| 24  | Sockeye salmon TF    | <i>Oncorhynchus nerka</i>       | D89085        |

**Table S9: Information of the *Escherichia/Shigella* 29 genomes**

|                     |          |
|---------------------|----------|
| E.coli IAI1         | CU928160 |
| E.coli SE11         | AP009240 |
| E.coli E24377A      | CP000800 |
| S.sonnei 046        | CP000038 |
| S.boydii 4227       | CP000036 |
| S.boydii CDC3083-94 | CP001063 |
| S.flexneri 5b8401   | CP000266 |
| S.flexneri 2a2457T  | AE014073 |
| S.flexneri 2a301    | AE005674 |
| E.coli ATCC 8739    | CP000946 |
| E.coli HS           | CP000802 |
| E.coli K12 MG1655   | U00096   |
| E.coli K12 W3110    | AP009048 |



|                       |          |
|-----------------------|----------|
| E.coli K12 DH10B      | CP000948 |
| E.coli K12 BW2952     | CP001396 |
| S.dysenteriae 1197    | CP000034 |
| E.coli O157H7 CB9615  | CP001846 |
| E.coli O157H7 EDL933  | AE005174 |
| E.coli O157H7 Sakai   | BA000007 |
| E.coli UMN026         | CU928163 |
| E.coli IAI39          | CU928164 |
| E.coli SMS 3-5        | CP000970 |
| E.coli O127H6 E234869 | FM180568 |
| E.coli 536            | CP000247 |
| E.coli ED1a           | CU928162 |
| E.coli CFT073         | AE014075 |
| E.coli S88            | CU928161 |
| E.coli UT189          | CP000243 |
| E.coli APEC01         | CP000468 |

**Table S10: Information of the 9 mammalian X chromosomes**

| <b>Name</b>             | <b>Assembly accession</b> | <b>Length (Mb)</b> |
|-------------------------|---------------------------|--------------------|
| Chimpanzee X chromosome | GCF_000001515.6           | 135.9              |
| Human X chromosome      | GCF_000001405.25          | 151.1              |
| Monkey X chromosome     | GCF_000772875.2           | 145.7              |
| Gorilla X chromosome    | GCF_000151905.1           | 143.0              |
| Dog X chromosome        | GCF_000002285.3           | 123.2              |
| Horse X chromosome      | GCF_000002305.2           | 121.6              |
| Mouse X chromosome      | GCF_000001635.25          | 163.5              |
| Opossum X chromosome    | GCF_000002295.2           | 73.0               |
| Platypus X2 chromosome  | GCF_000002275.2           | 5.5                |
