# Supplementary material for: Alignment-free method for DNA sequence clustering using Fuzzy integral similarity
Source: PubMed Central journal article supplement (PMC6403383; doi:10.1038/s41598-019-40452-6), 2019-03-06
Supplement: 41598_2019_40452_MOESM2_ESM.pdf [file 41598_2019_40452_MOESM2_ESM.pdf]

# Alignment-free method for DNA sequence clustering using Fuzzy integral similarity

Ajay Kumar Saw<sup>1</sup>, Garima Raj<sup>2</sup>, Manashi Das<sup>3</sup>, Narayan C. Talukdar<sup>4</sup>, Binod Chandra Tripathy<sup>5</sup> and Soumyadeep Nandi<sup>6,\*</sup>

<sup>1</sup>Mathematical Sciences Division, Institute of Advanced Study in Science and Technology, Guwahati-35, Assam, India.

<sup>2,3,4,6</sup>Life Science Division, Institute of Advanced Study in Science and Technology, Guwahati-35, Assam, India.

<sup>5</sup>Mathematics Department, Tripura University, Tripura, India.

\*To whom correspondence should be addressed. Email: [soumyadeep.nandi@gmail.com](mailto:soumyadeep.nandi@gmail.com); [snandi@iasst.gov.in](mailto:snandi@iasst.gov.in)

## Supplementary material (Figures)

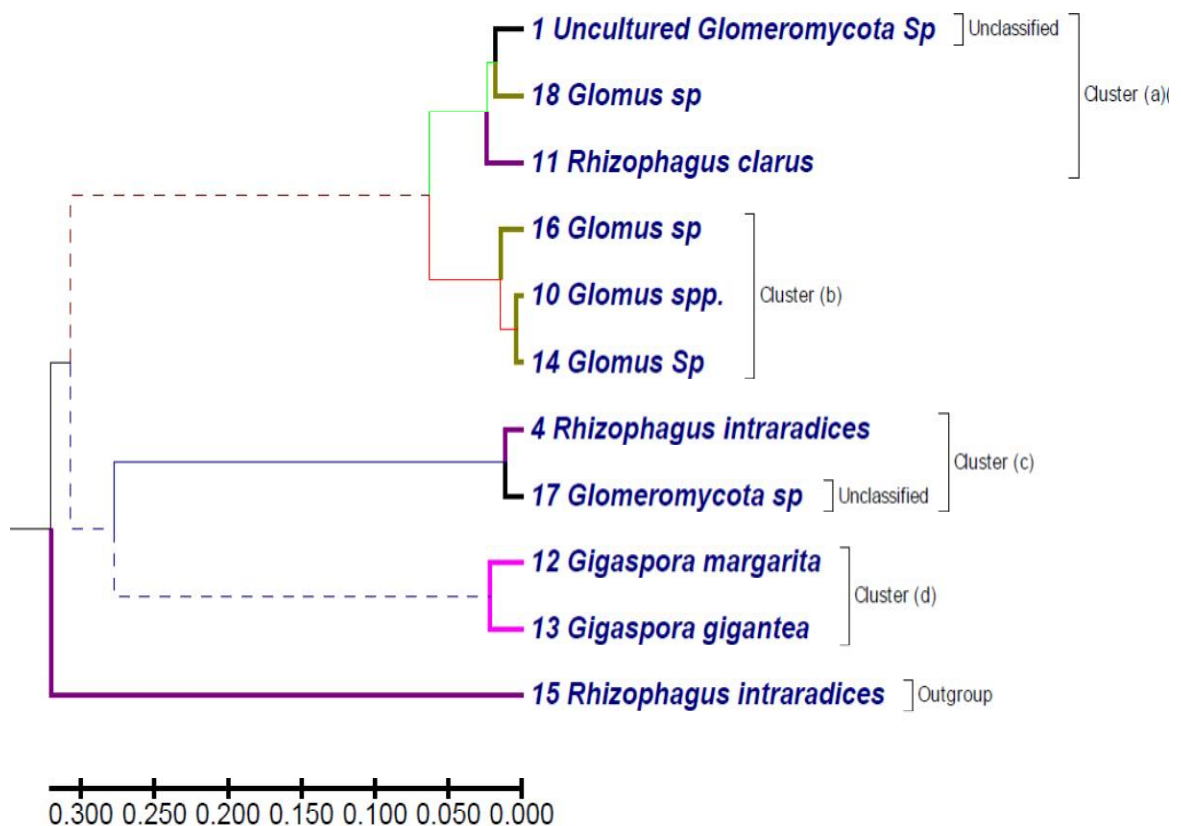

Figure S1: The phylogenetic tree of the 11 AMF sequences constructed by ClustalW method using MEGA package[a].

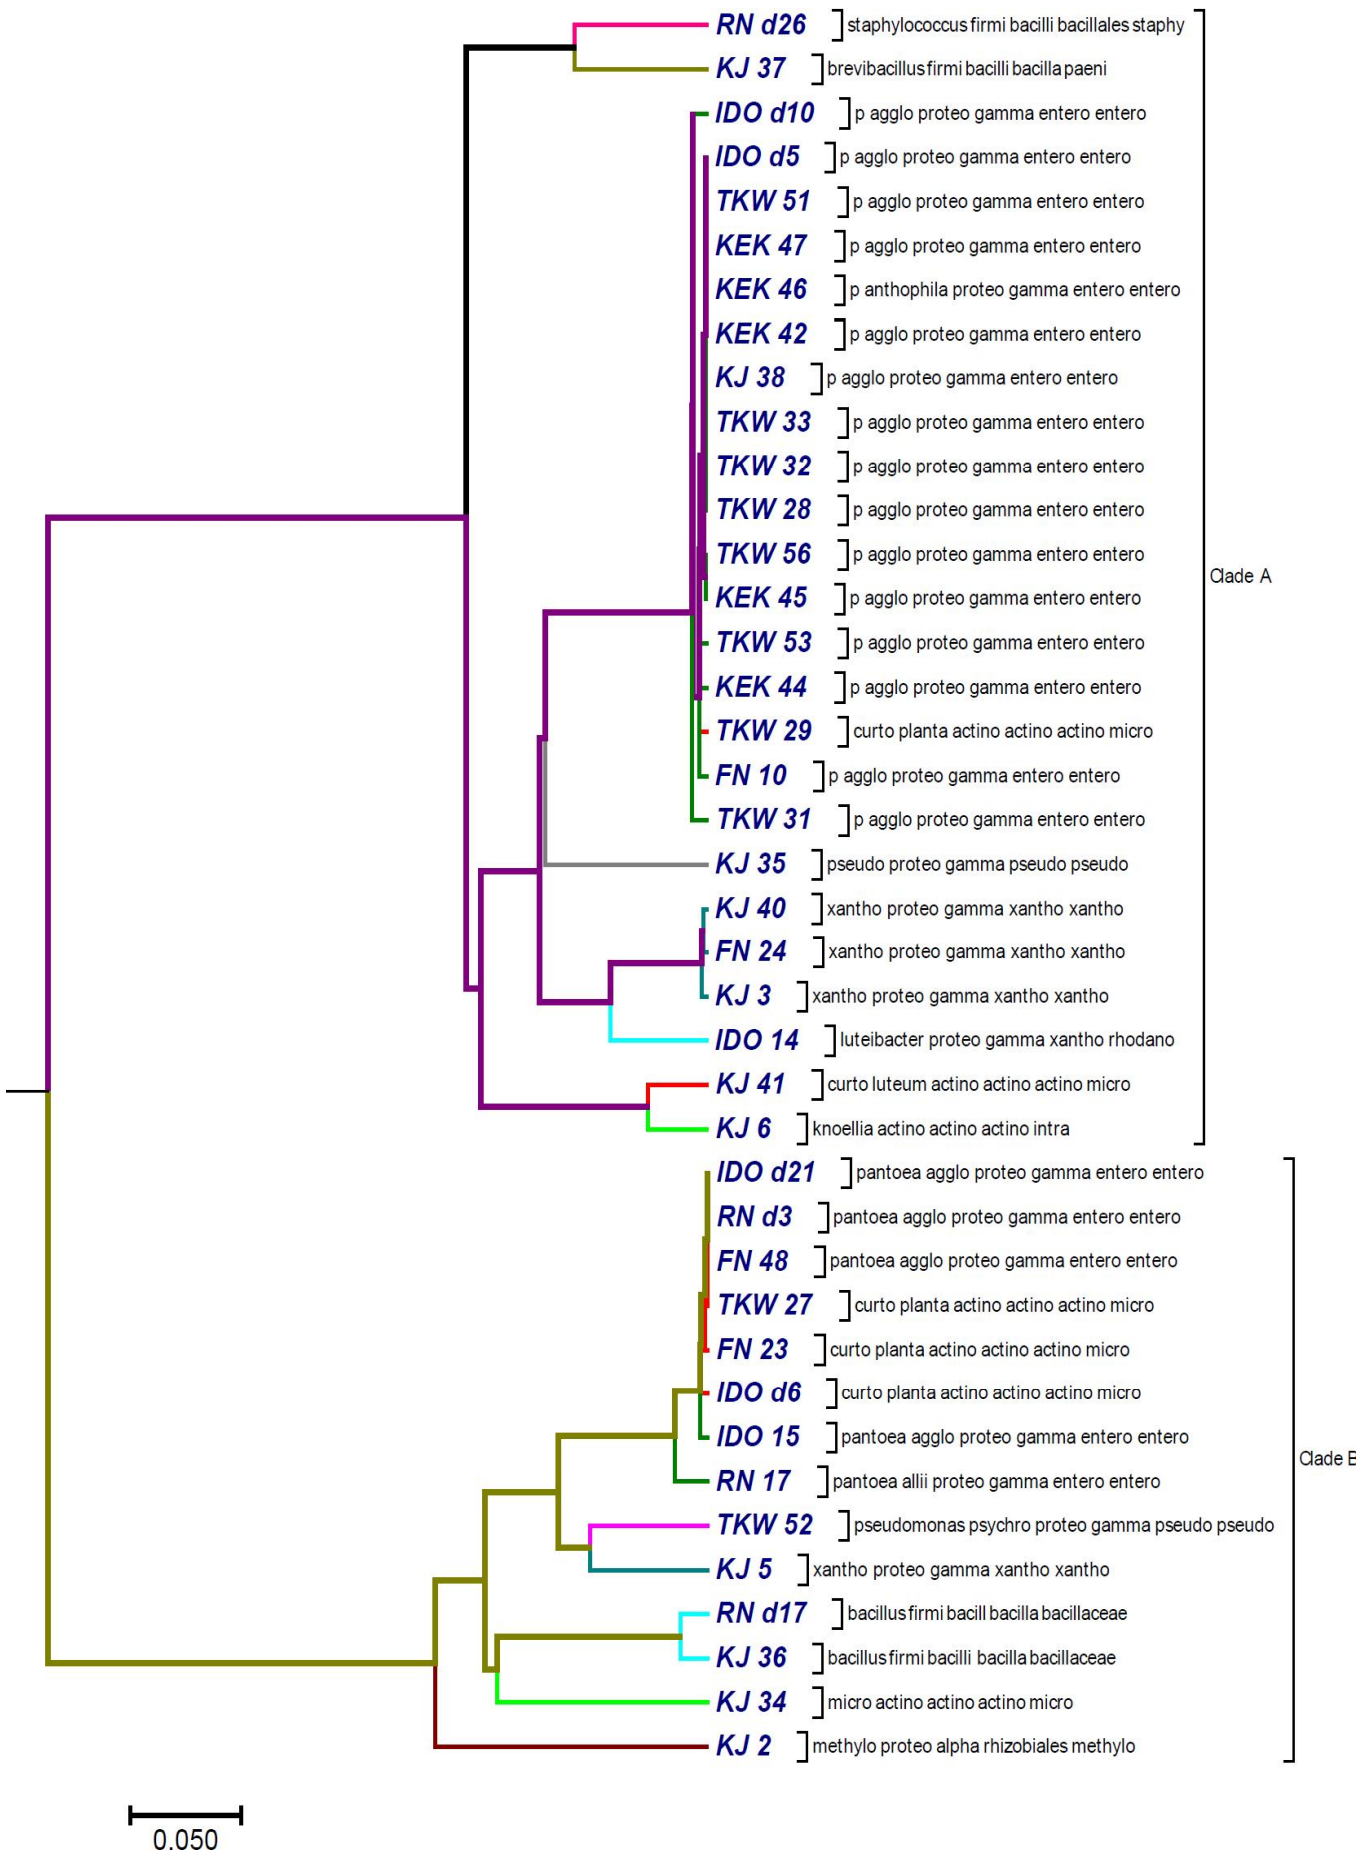

**Figure S2: The phylogenetic tree of the 16S rDNA sequences from 40 bacterial isolates constructed by ClustalW method using MEGA package[a].**

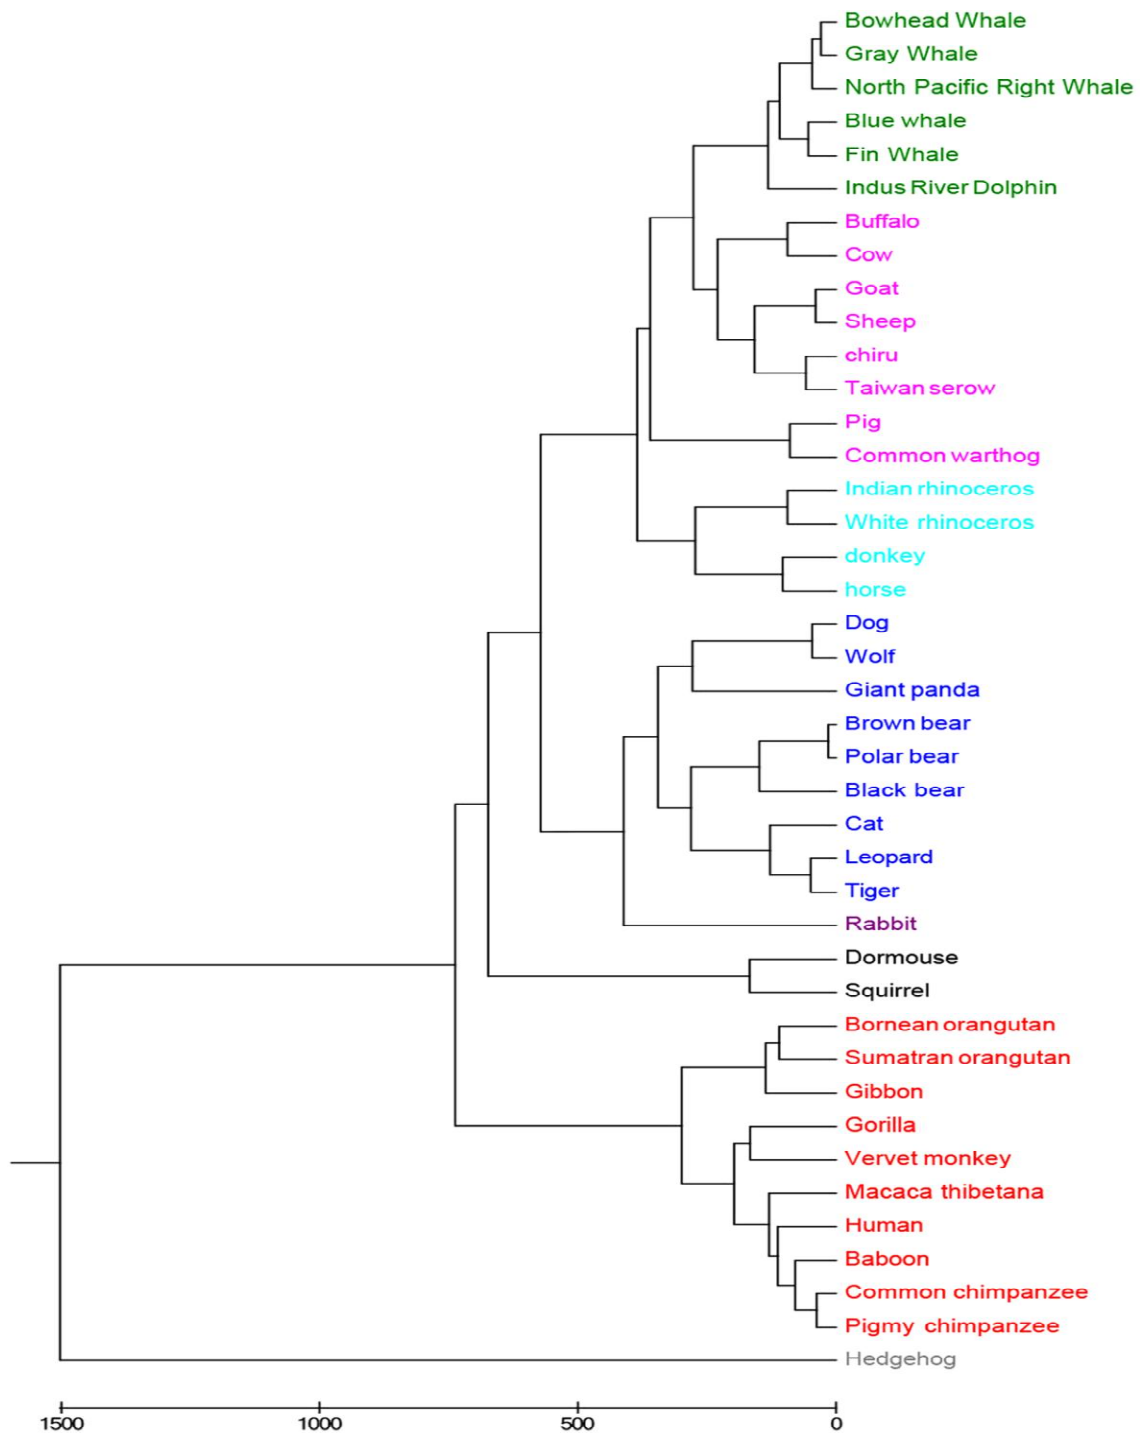

**Figure S3: Phylogenetic tree of 41 mitochondrial genome sequences based on multiple encoding vector method[b]. The 8 clusters are *Primates* (red), *Cetacea* (green), *Artiodactyla* (pink), *Perissodactyla* (light green), *Rodentia* (black), *Lagomorpha* (dark red), *Carnivore* (blue), and *Erinaceomorpha* (grey).**

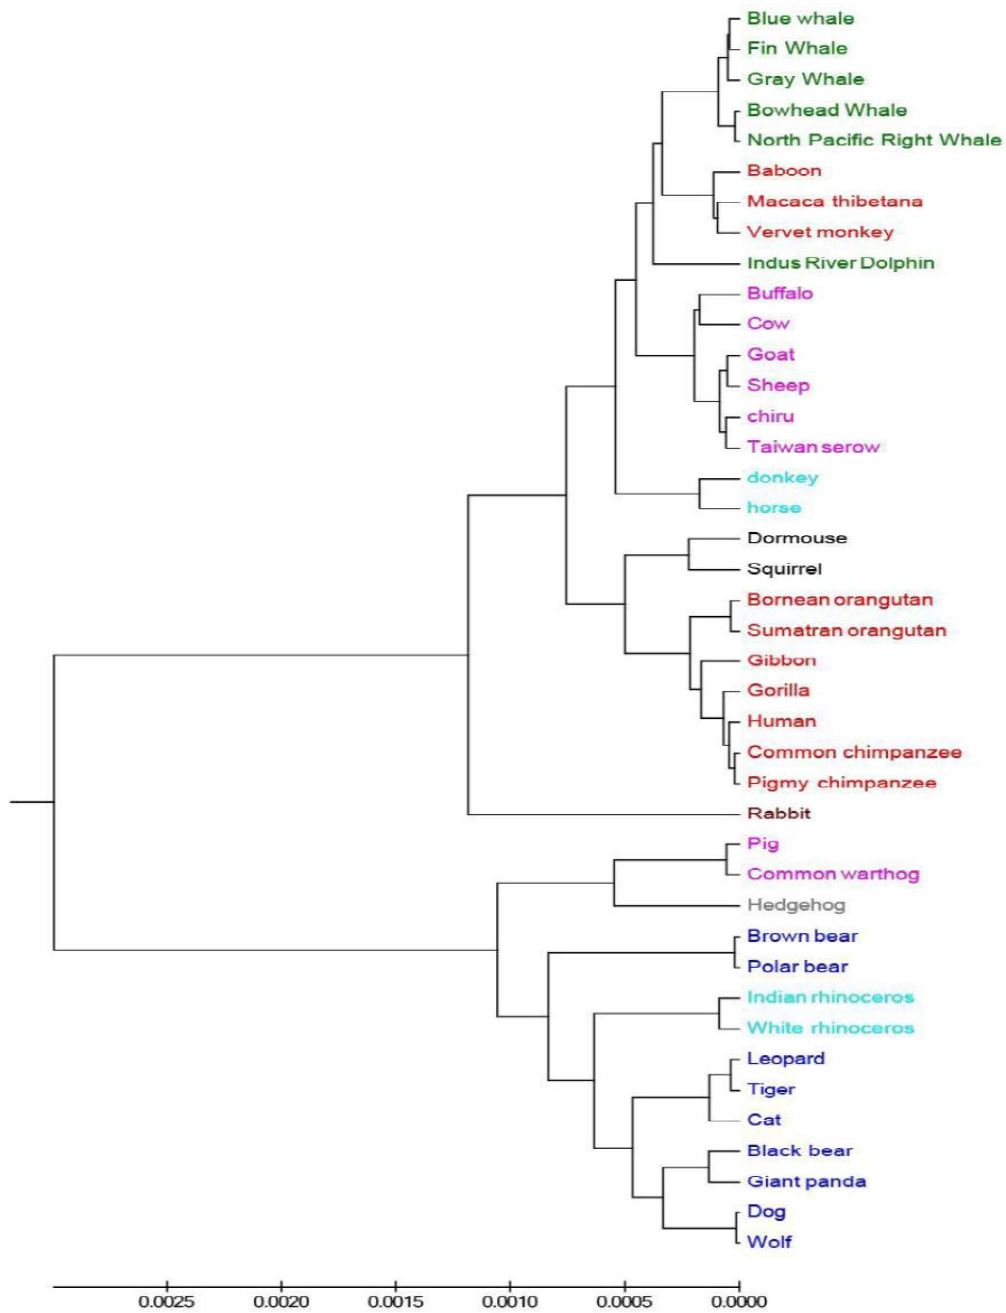

**Figure S4: Phylogenetic tree of 41 mitochondrial genome sequences based on feature frequency profiles method using 7 mer[b]. The 8 clusters are *Primates* (red), *Cetacea* (green), *Artiodactyla* (pink), *Perissodactyla* (light green), *Rodentia* (black), *Lagomorpha* (dark red), *Carnivore* (blue), and *Erinaceomorpha* (grey).**

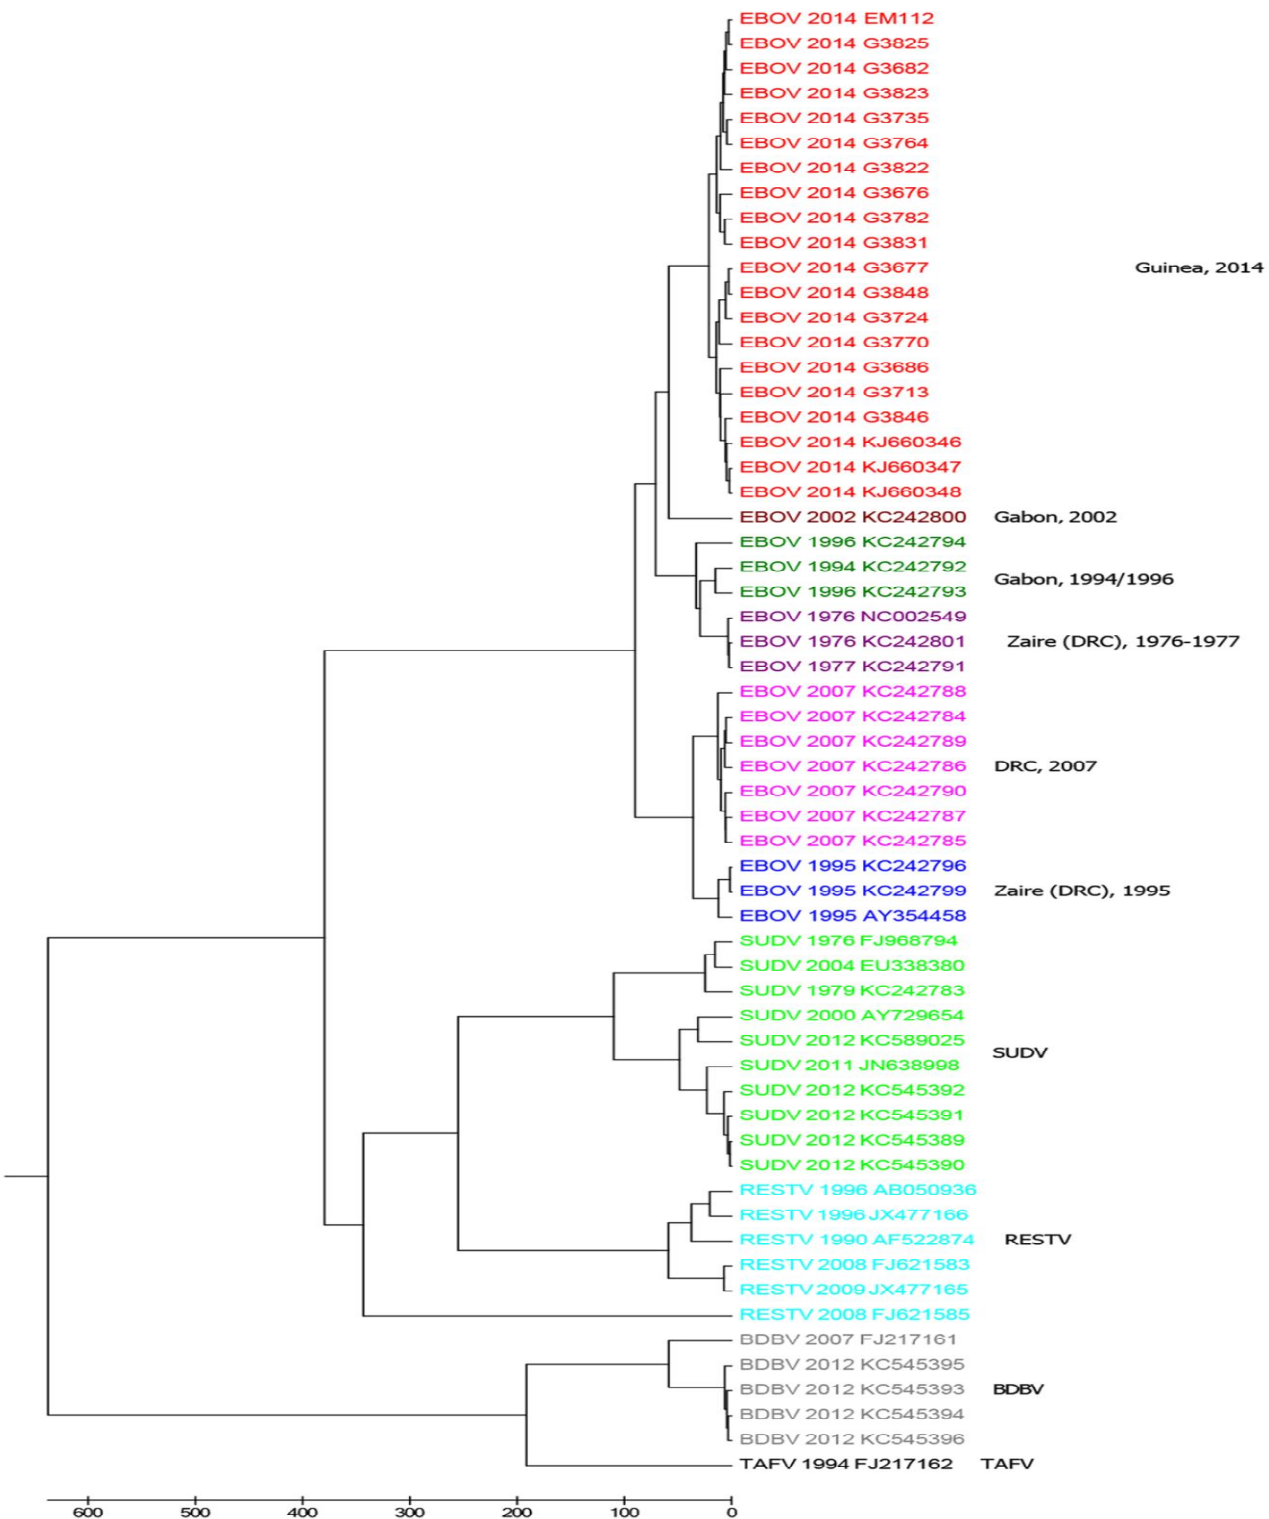

**Figure S5: Phylogenetic tree of 59 ebolavirus complete genomes based on multiple encoding vector method[b]. DRC = Democratic Republic of Congo, EBOV = Ebola virus, SUDV = Sudan virus, BDBV = Bundibugyo virus, TAFV = Tai Forest virus, RESTV = Reston virus.**

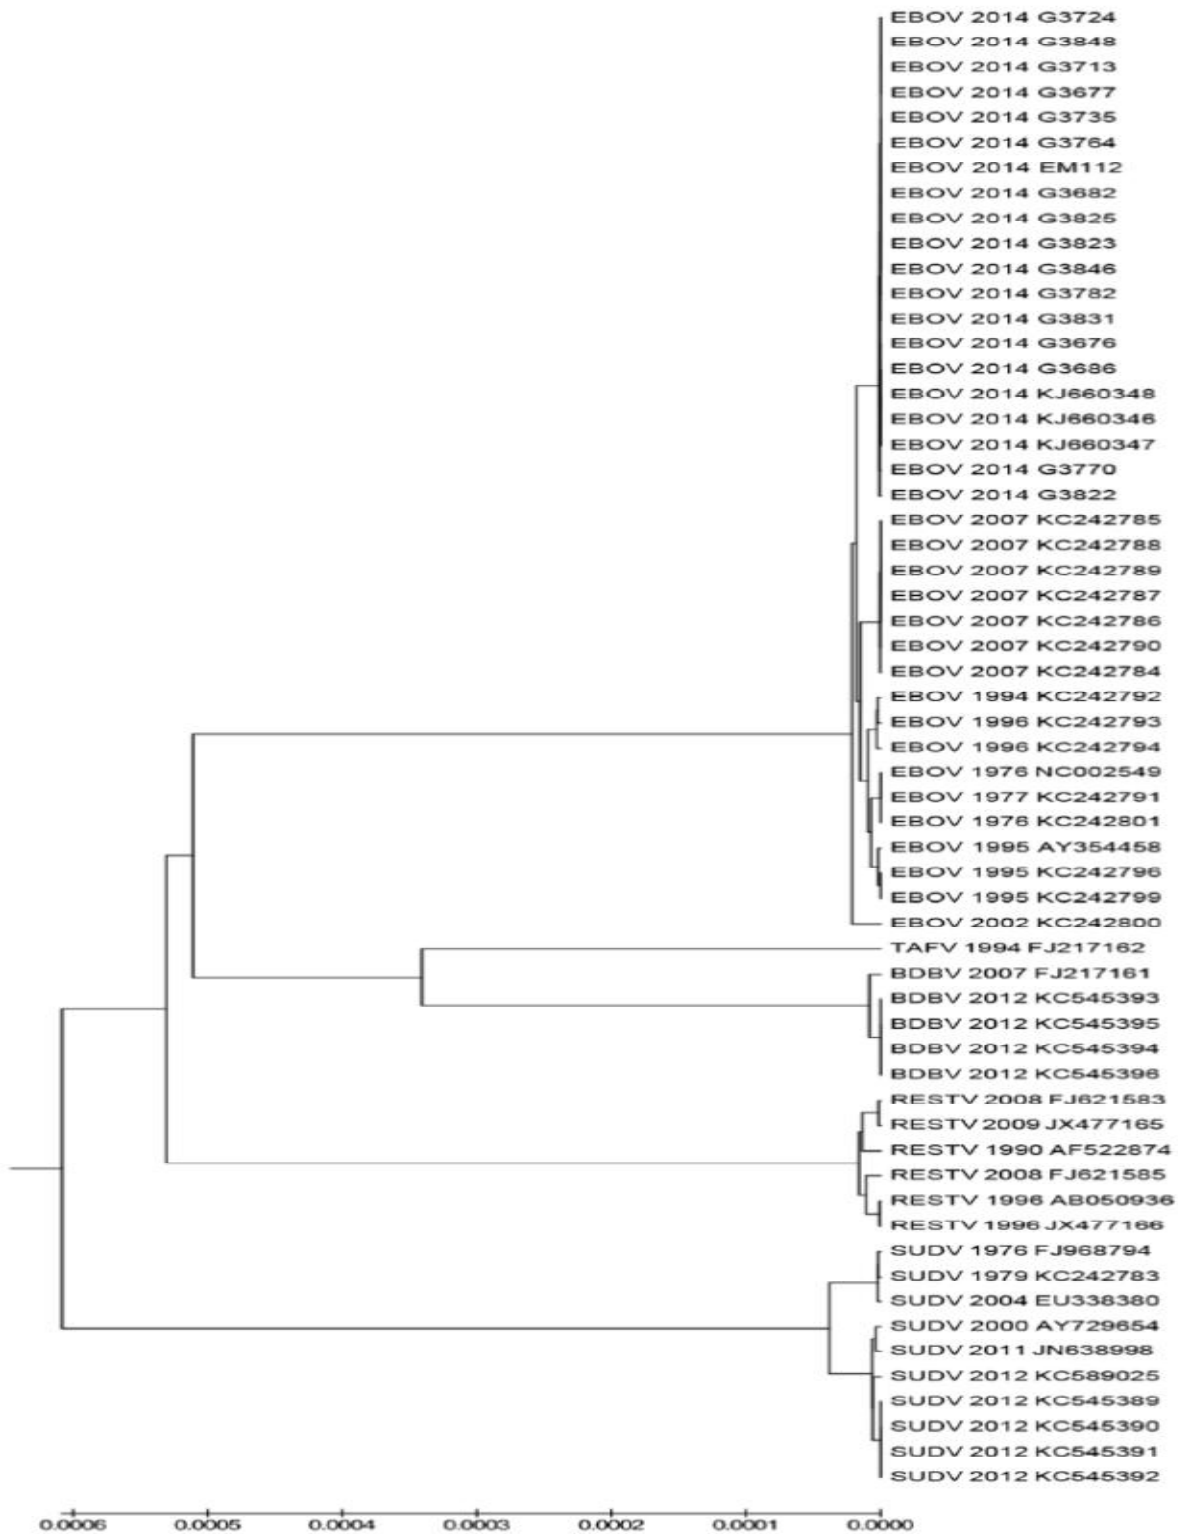

**Figure S6: Phylogenetic tree of 59 ebolavirus complete genomes based on Feature frequency profiles method using 7 mer[b]. DRC = Democratic Republic of Congo, EBOV = Ebola virus, SUDV = Sudan virus, BDBV = Bundibugyo virus, TAFV = Tai Forest virus, RESTV = Reston virus.**

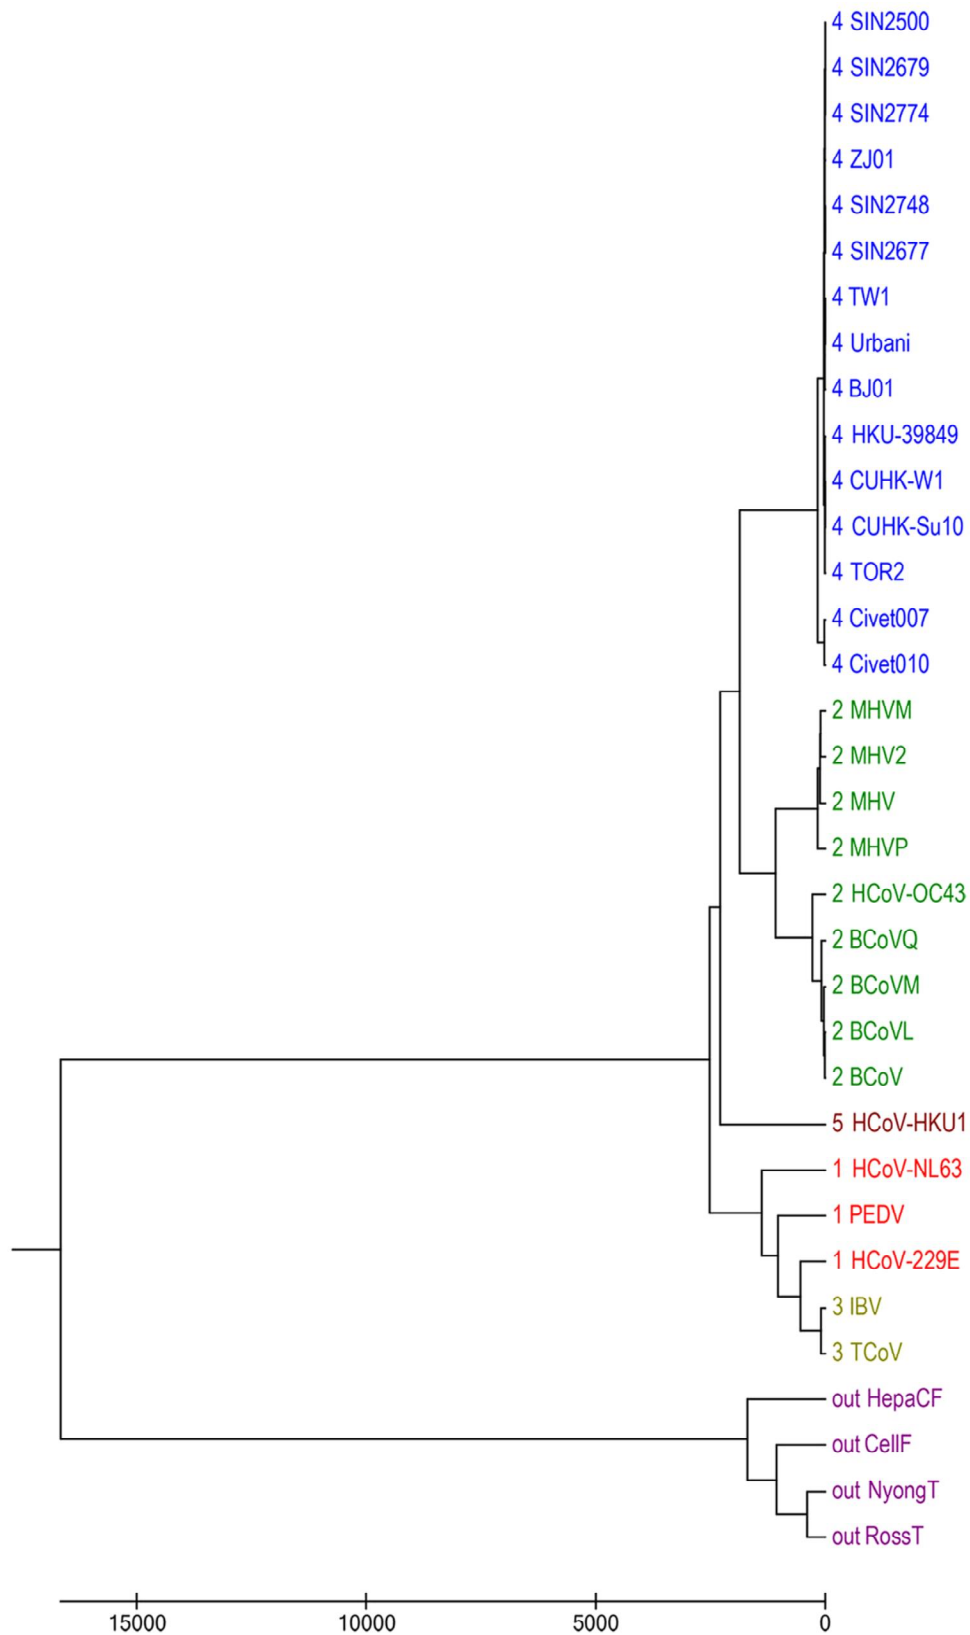

**Figure S7: Phylogenetic tree of 30 coronavirus and 4 non-coronavirus whole genomes using the multiple encoding vector method[b].**

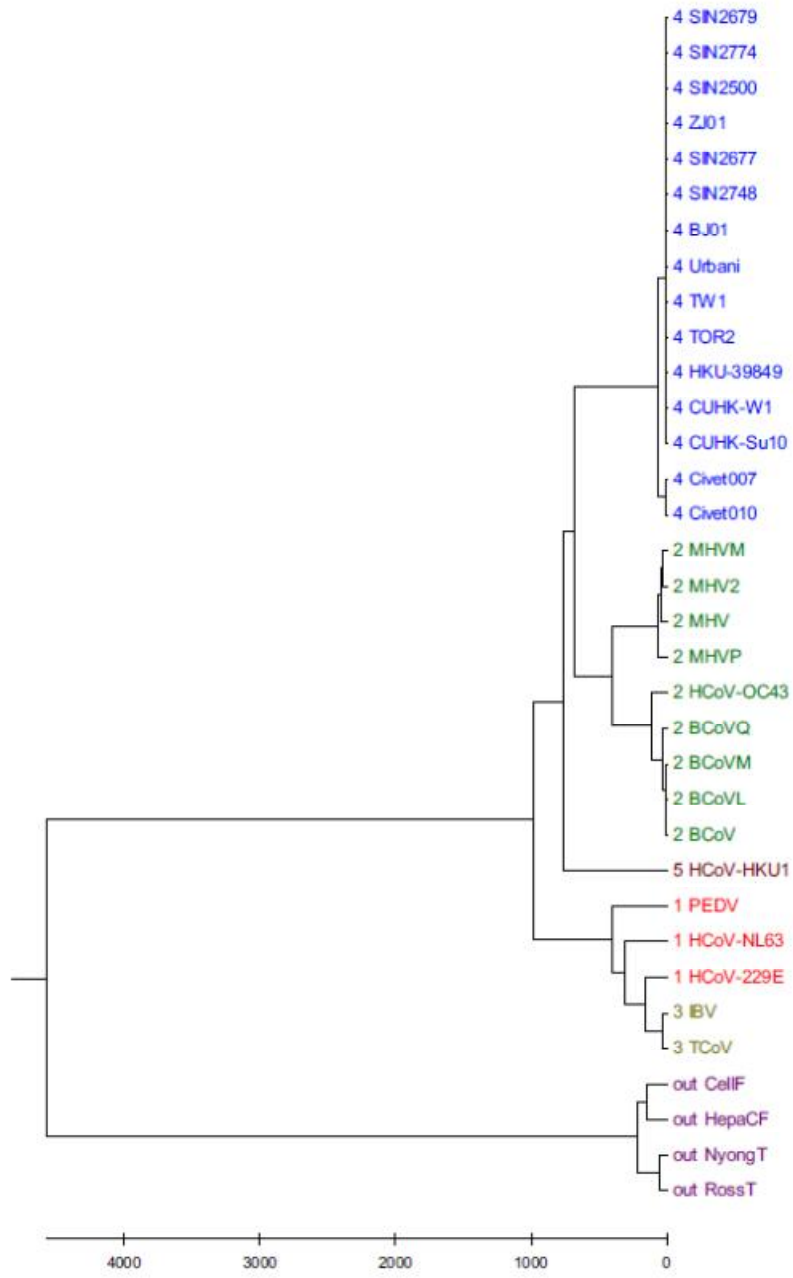

**Figure S8: Phylogenetic tree of 30 coronavirus and 4 non-coronavirus whole genomes using the PS method[c].**



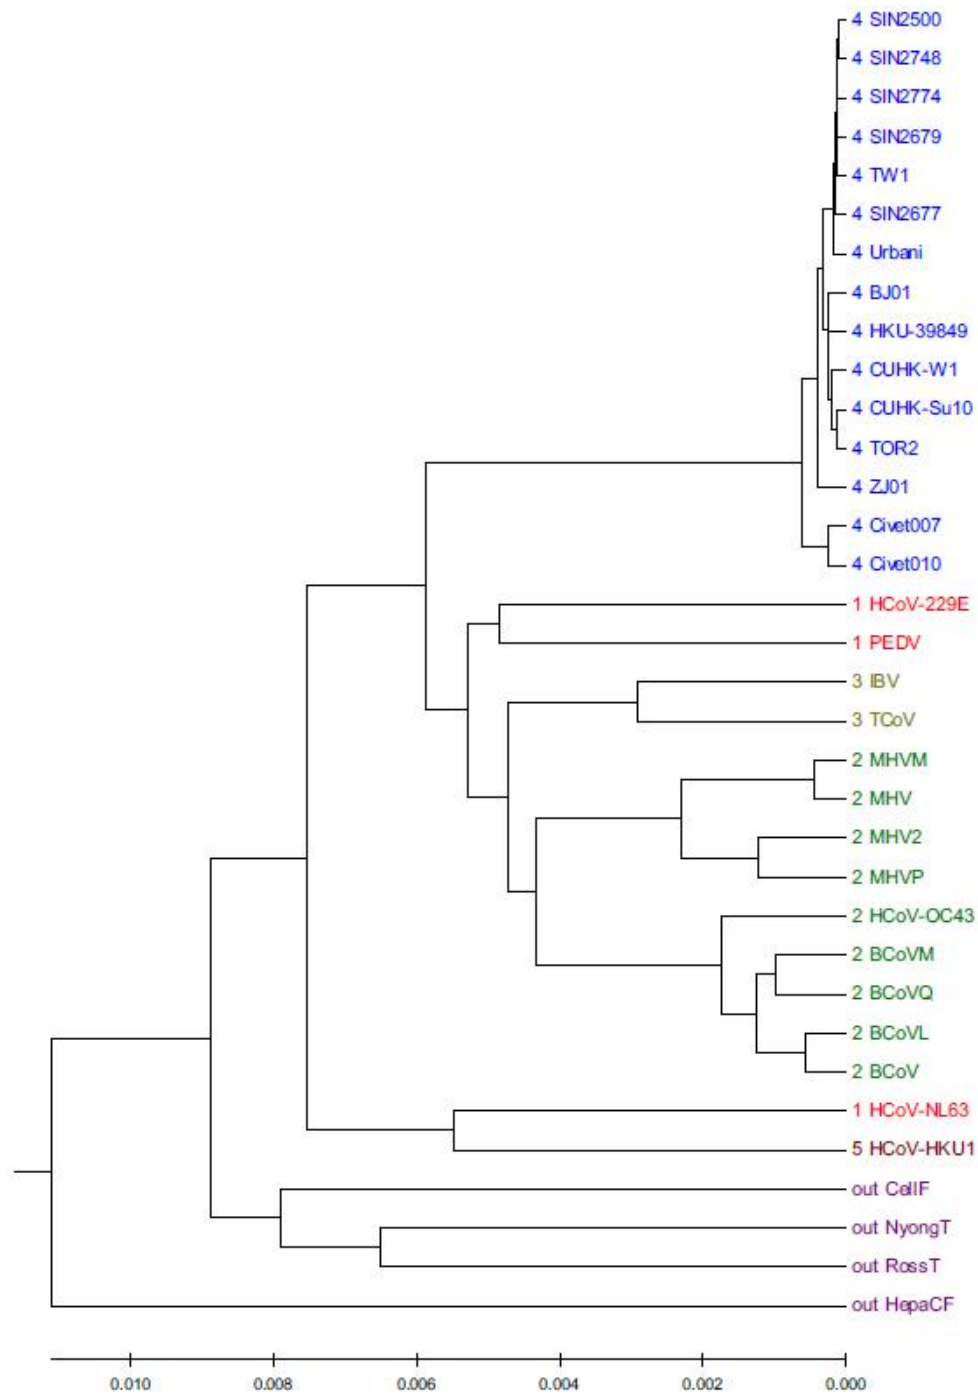

**Figure S9: Phylogenetic tree of 30 coronavirus and 4 non-coronavirus whole genomes using the k-mer method, k=6[c].**

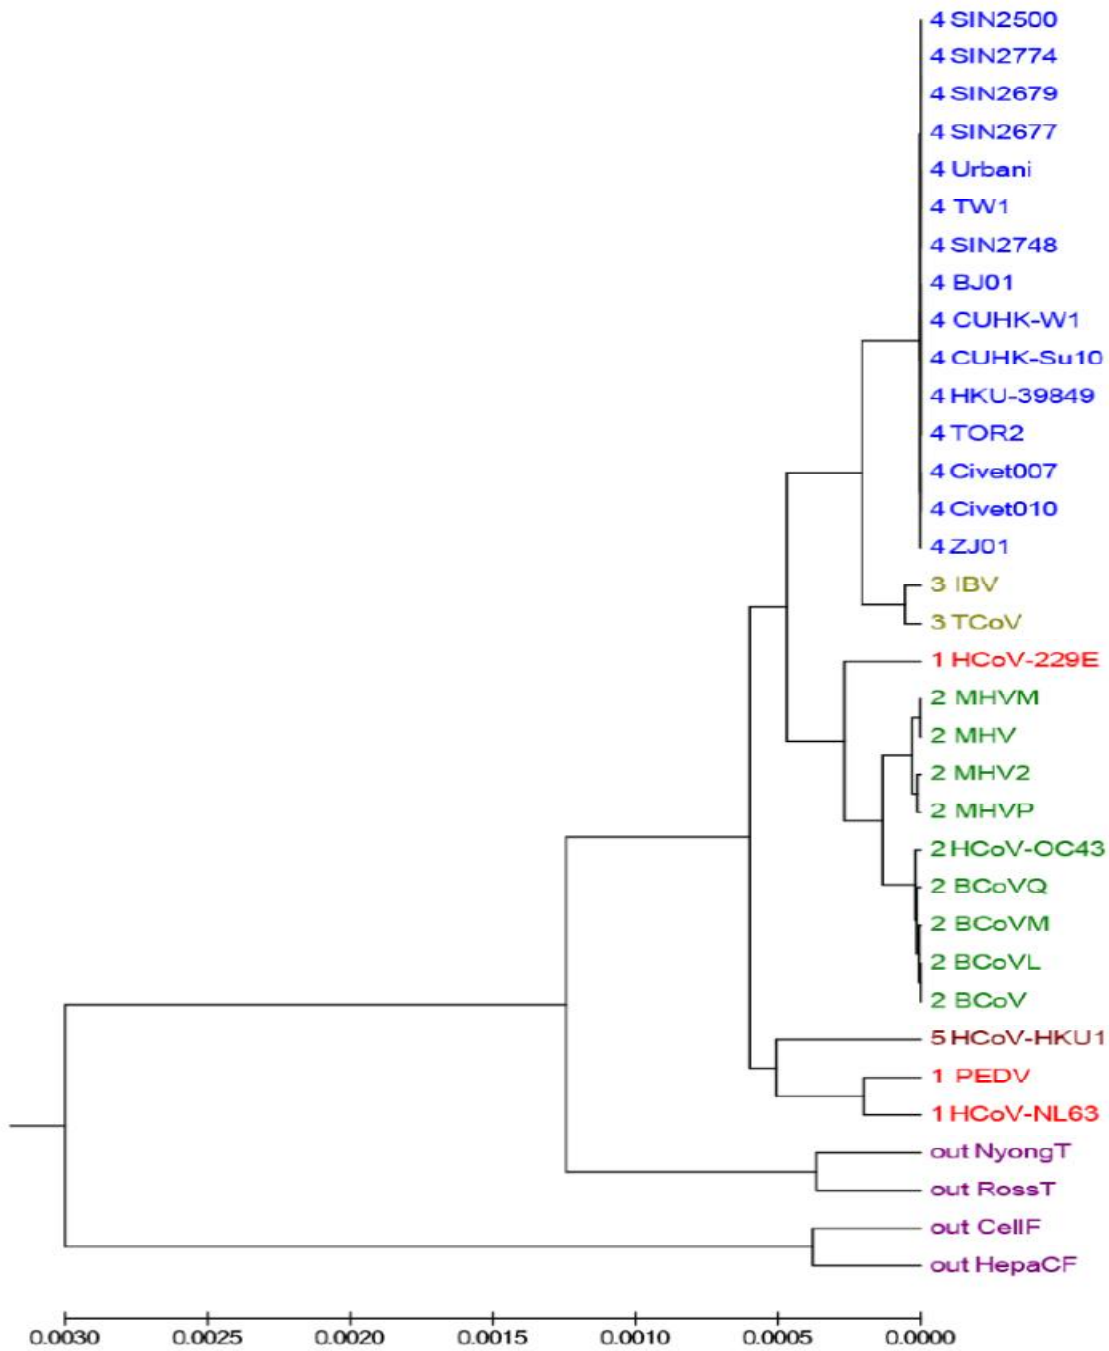

Figure S10: The UPGMA Phylogenetic tree of 30 coronavirus and 4 non-coronavirus whole genomes based on feature frequency profiles method using 6 mer[b].

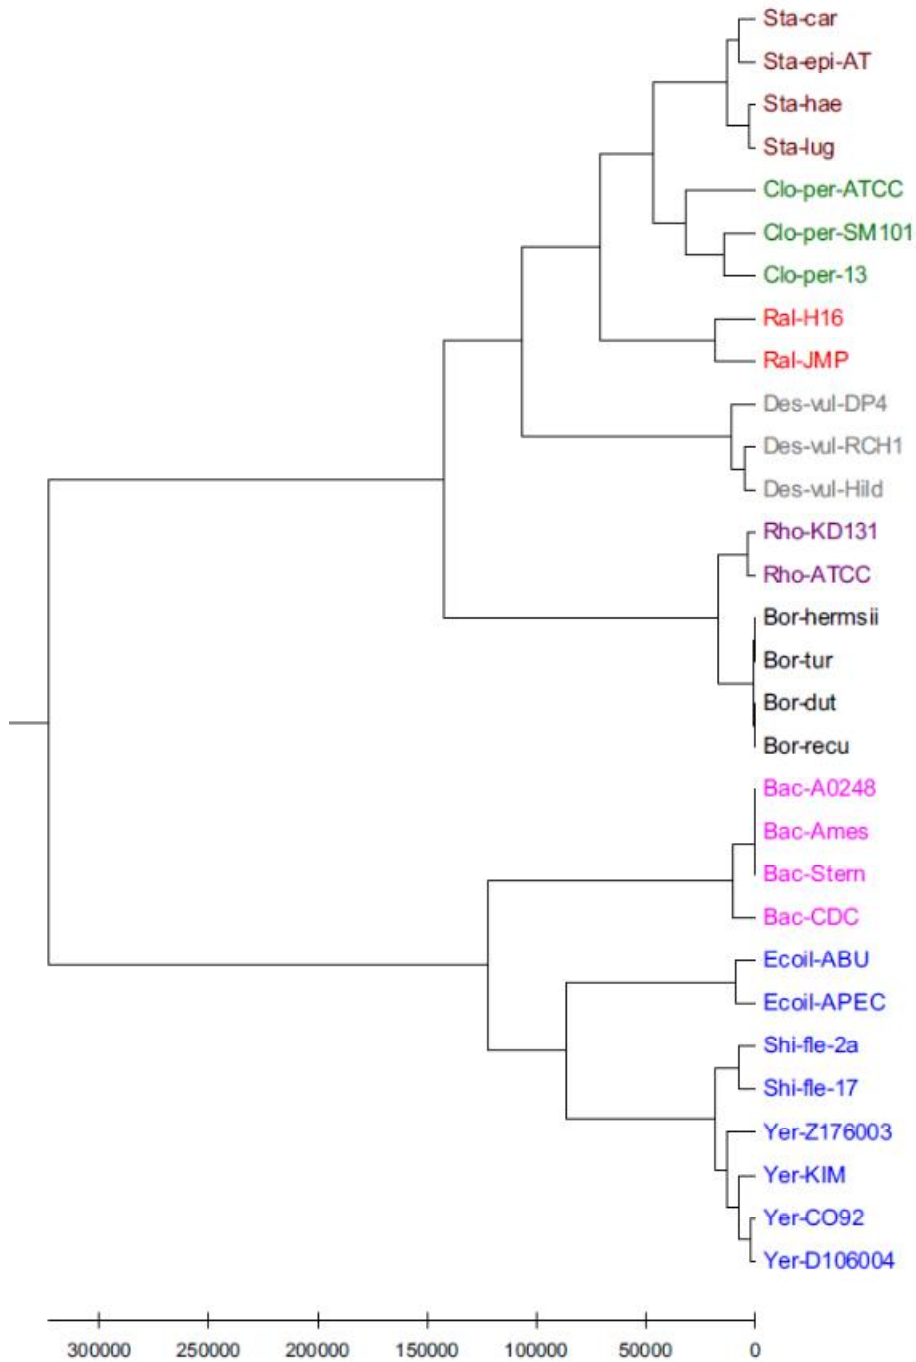

Figure S11: Phylogenetic tree of 30 bacteria whole genomes using the PS method[c].

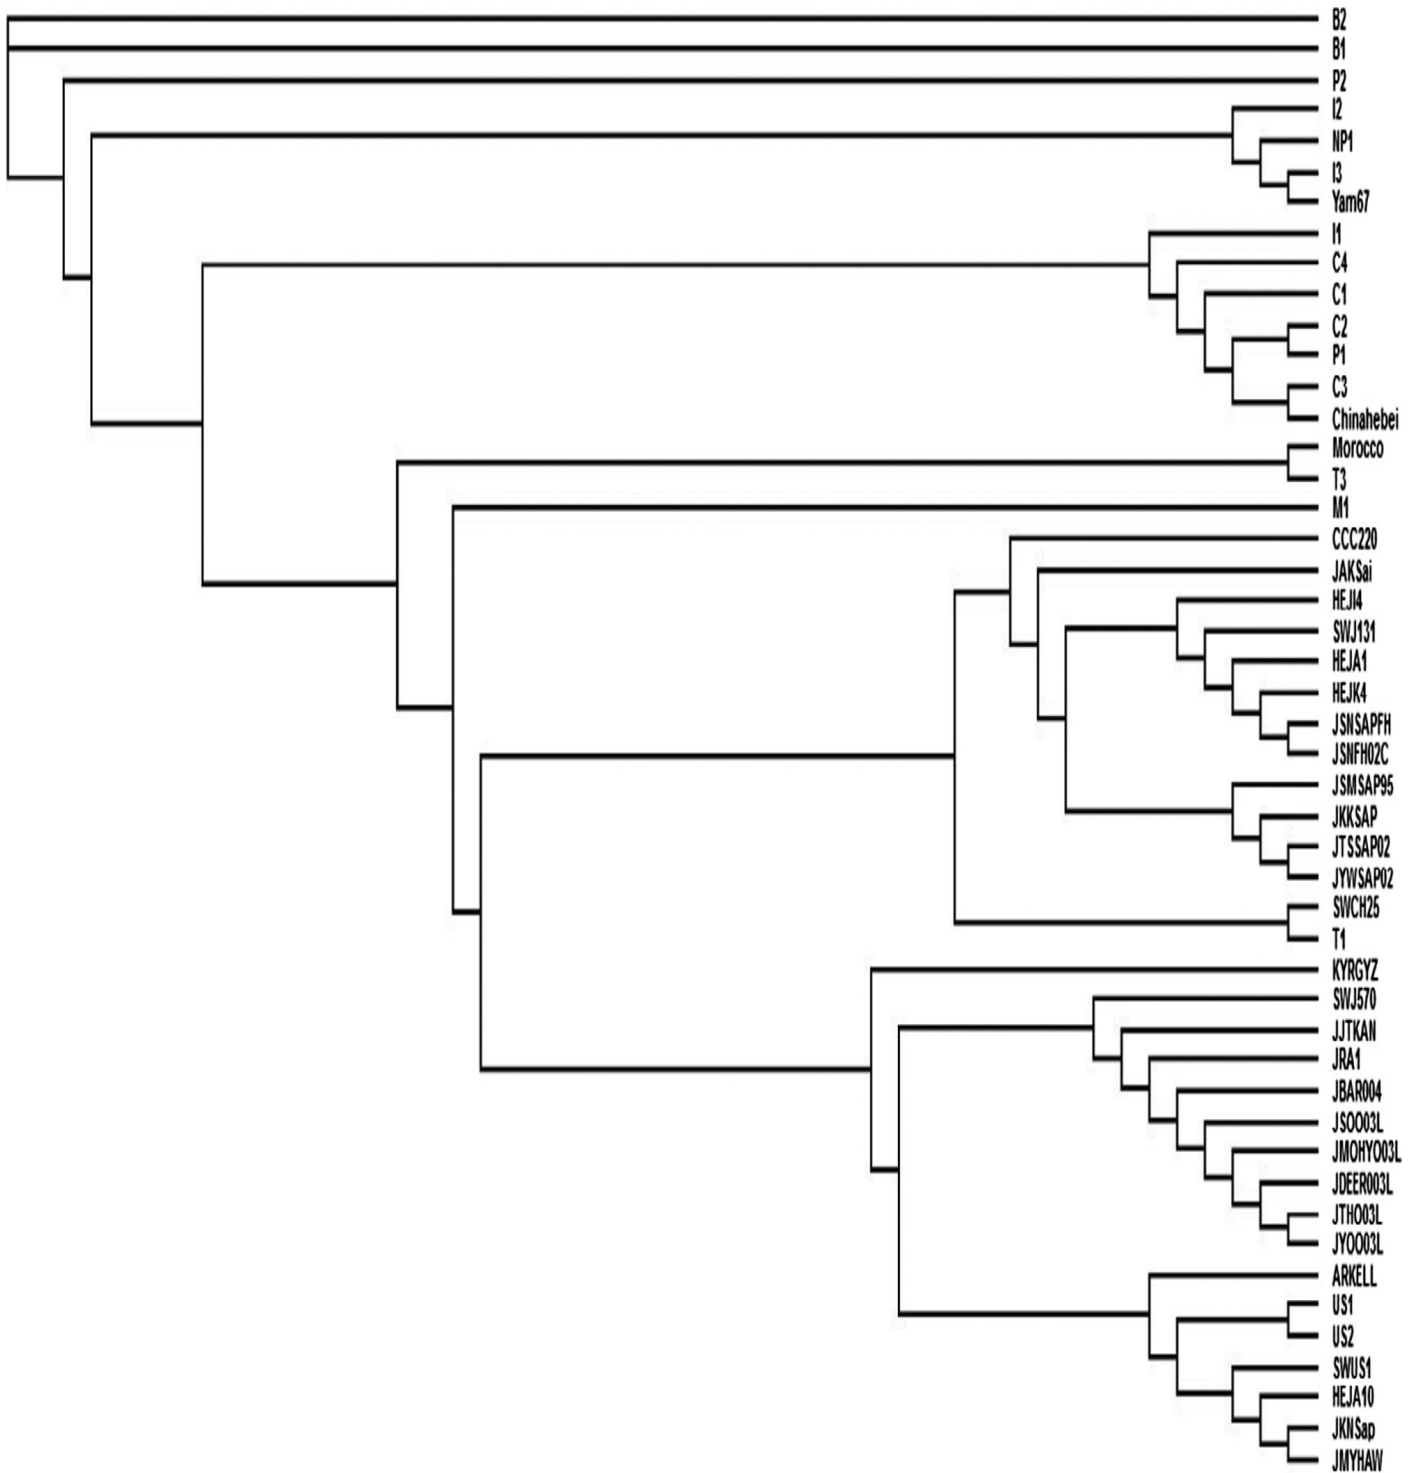

Figure S12: Phylogenetic tree obtained by the weighted measure using 48 HEV sequences[d].

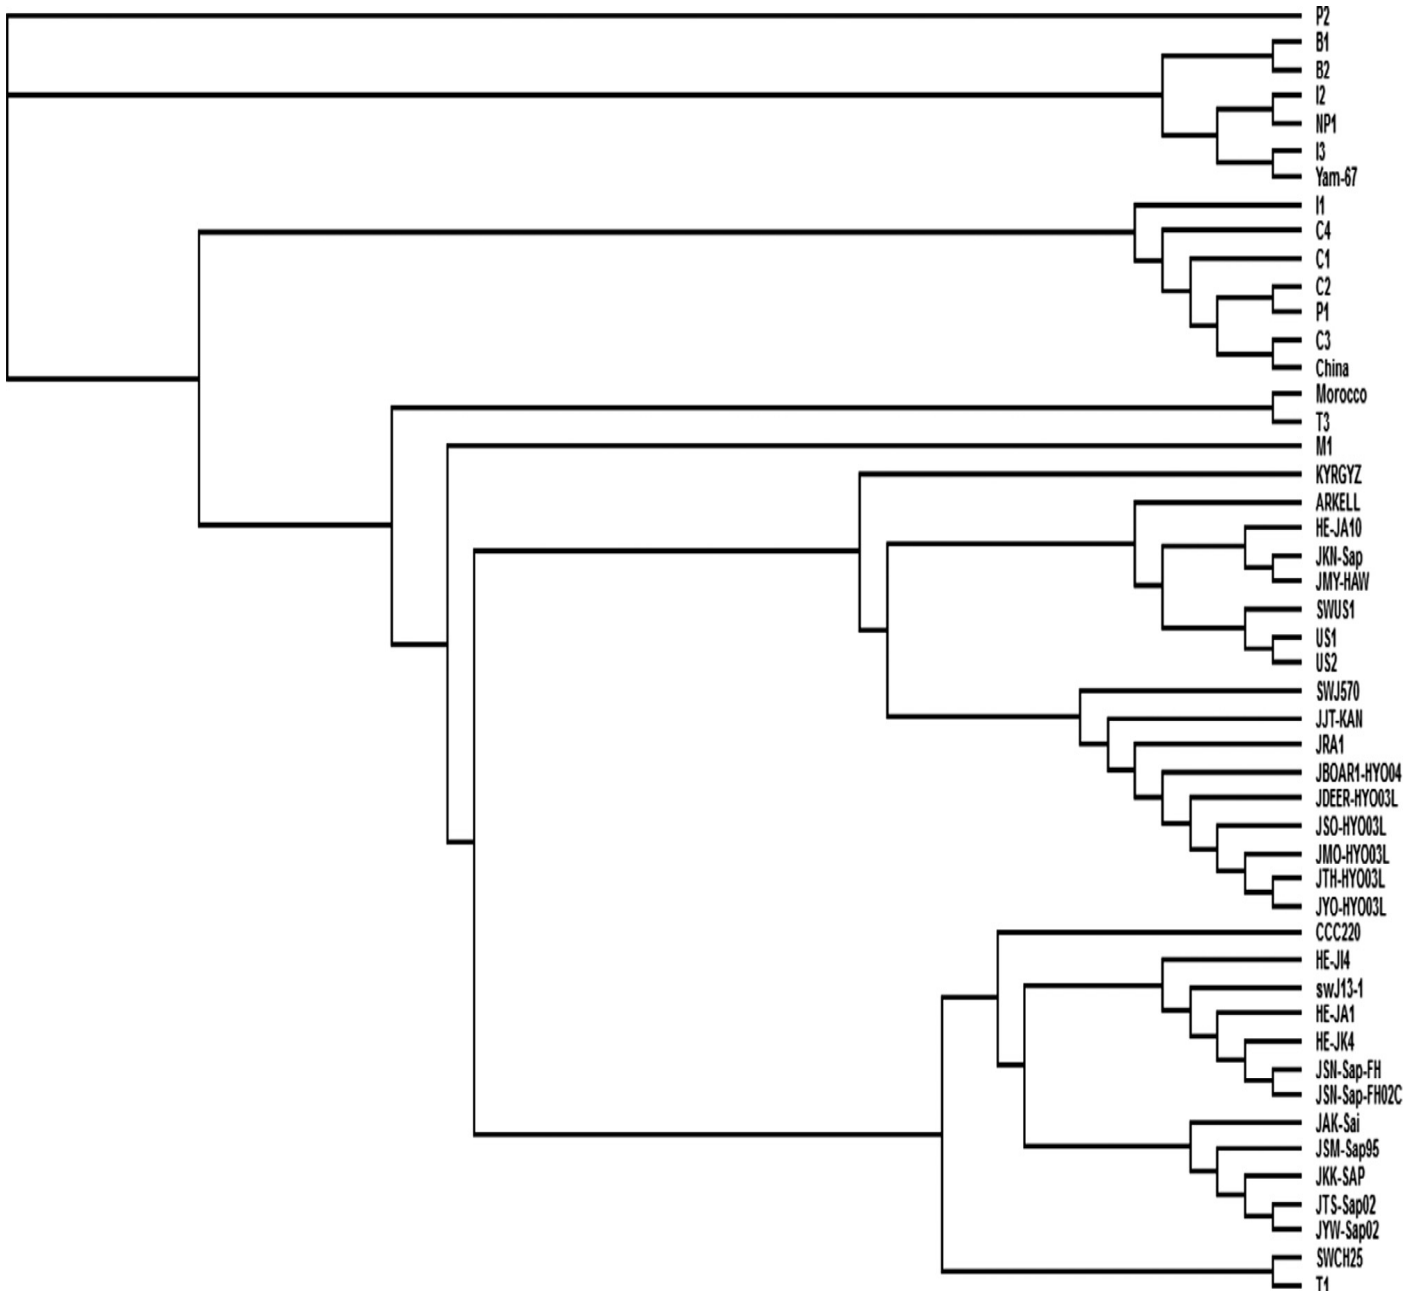

Figure S13: Phylogenetic tree obtained by the ClustalW using 48 HEV sequences[d].

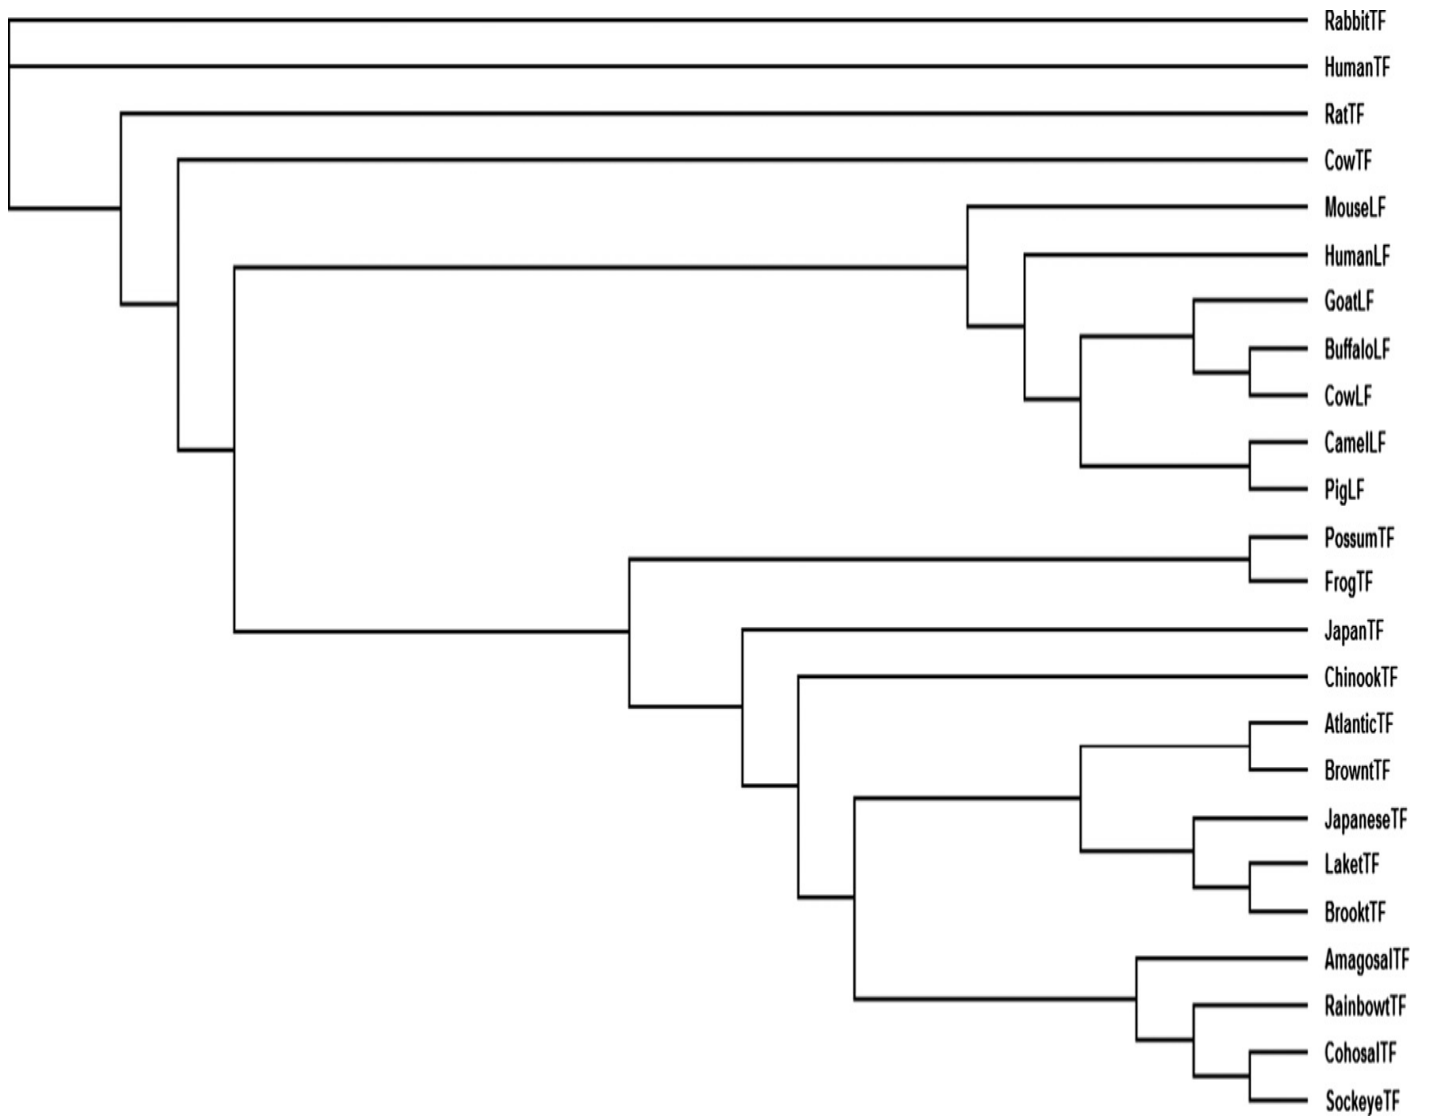

**Figure S14: Phylogenetic tree obtained by the weighted measure using 24 Eutherian mammal sequences[d].**

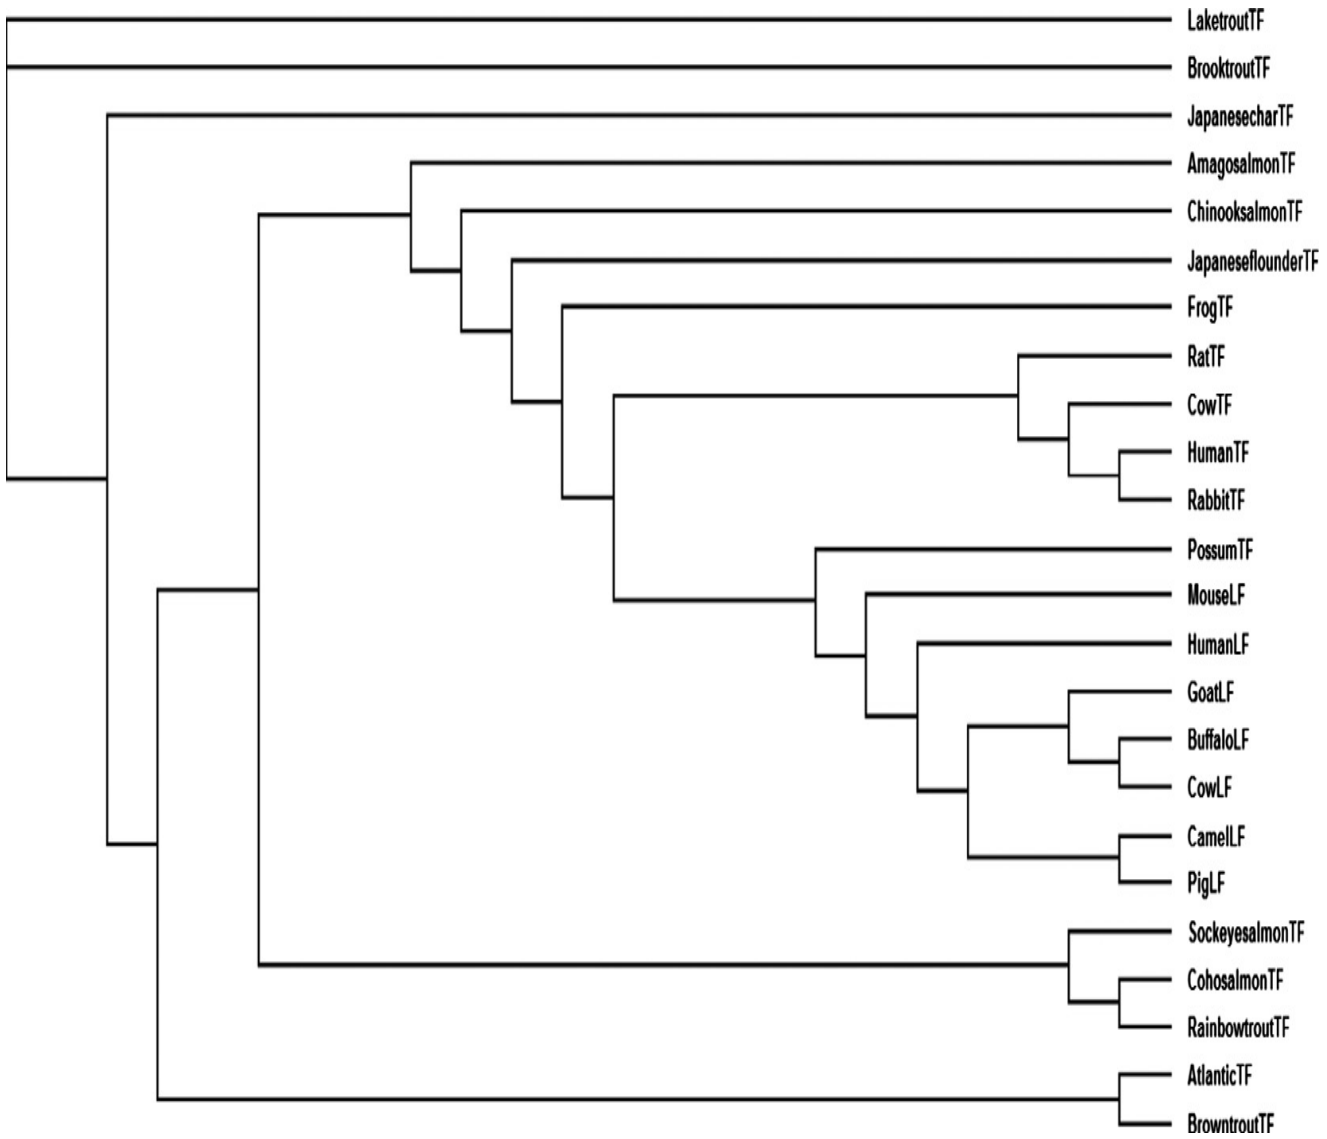

**Figure S15: Phylogenetic tree obtained by ClustalW using 24 Eutherian mammal sequences[d].**

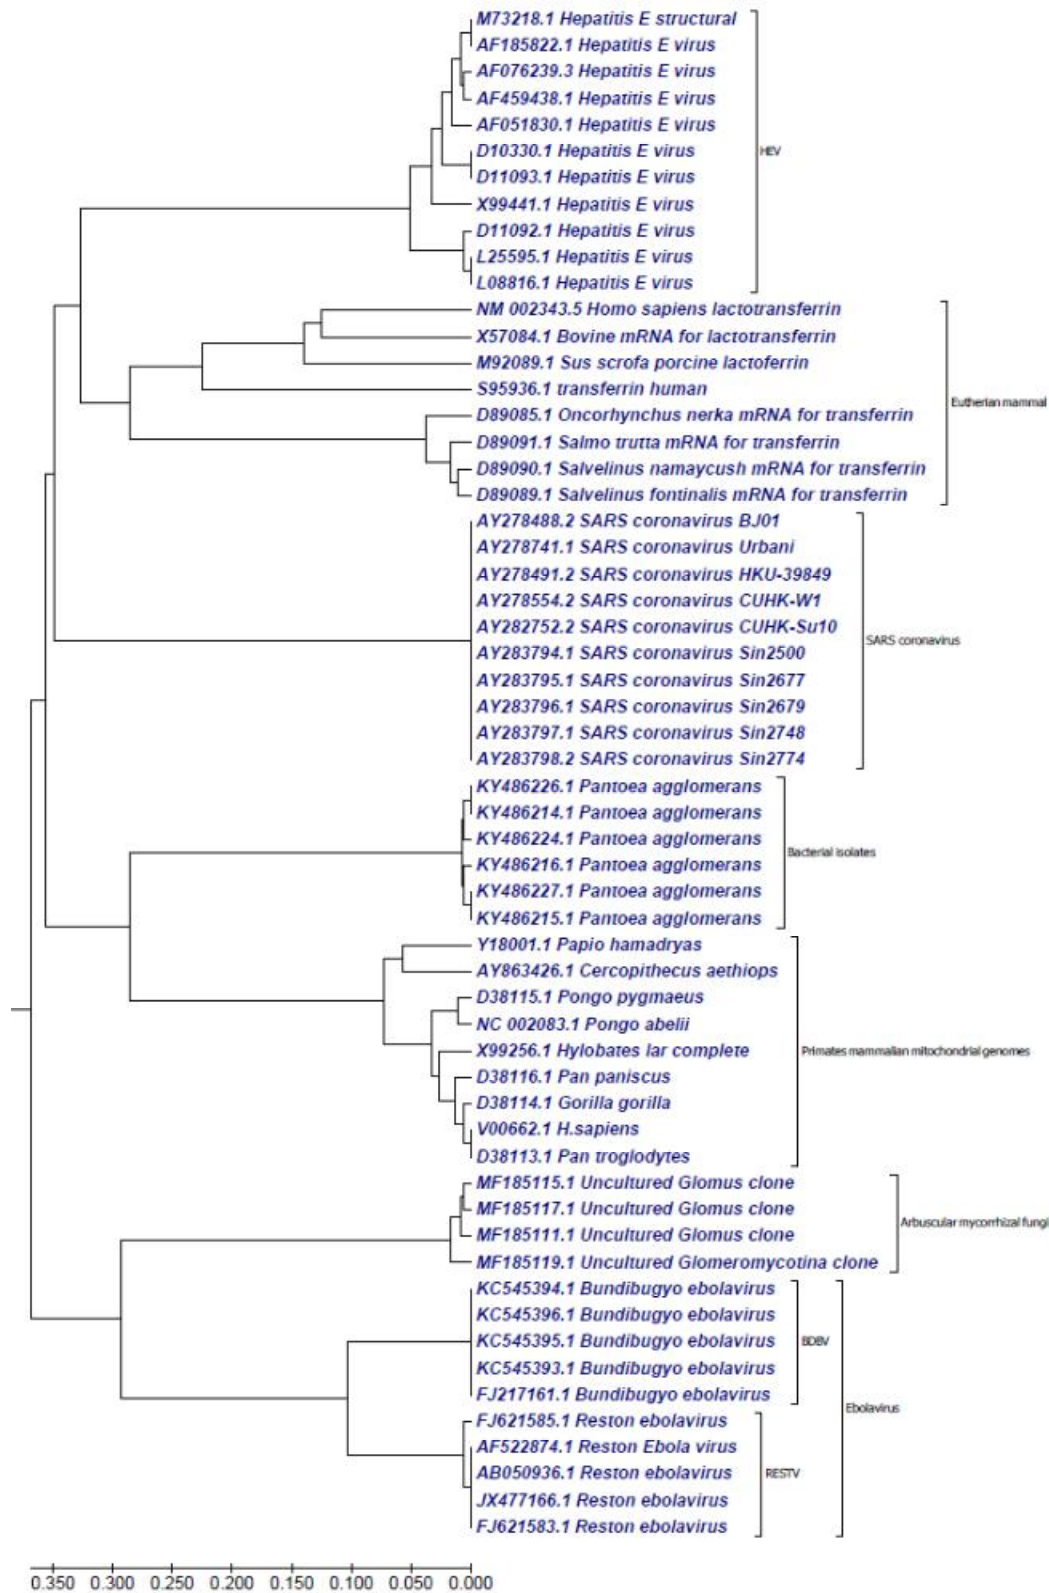

**Figure S16: Phylogenetic tree obtained by ClustalW method using 58 genome datasets from different species.**



## Robinson-Foulds distance

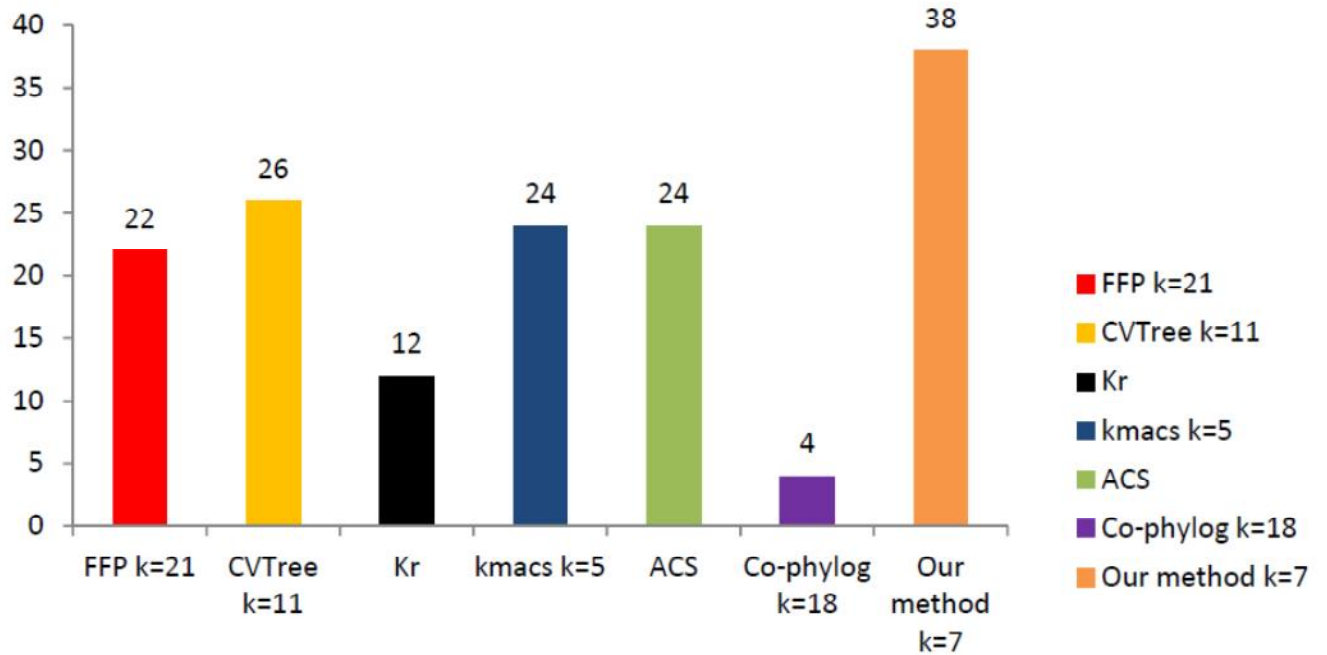

**Figure S17: Robinson-Foulds distance of the benchmark tree against the trees constructed by our method, FFP k=21, CVTree k=11, Kr, kmacs k=5, ACS, Co-phylog k=18 using the Escherichia/Shigella 29 complete genomes[g].**

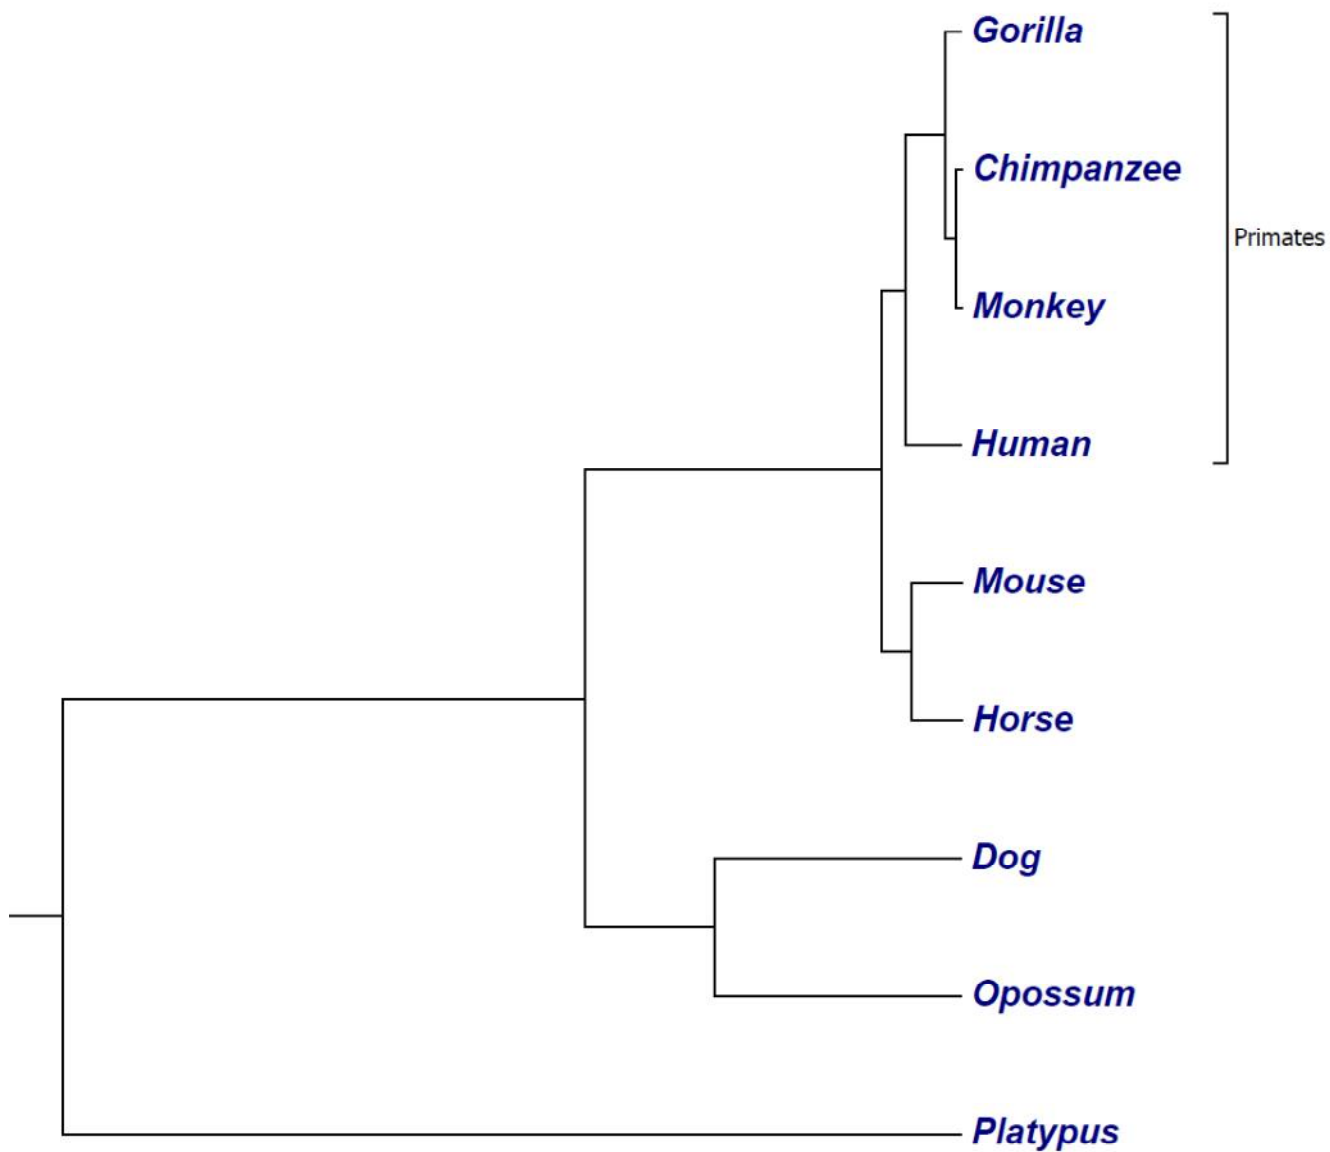

Figure S18: The phylogenetic tree of 9 mammals constructed by our method using PHYLIP package.

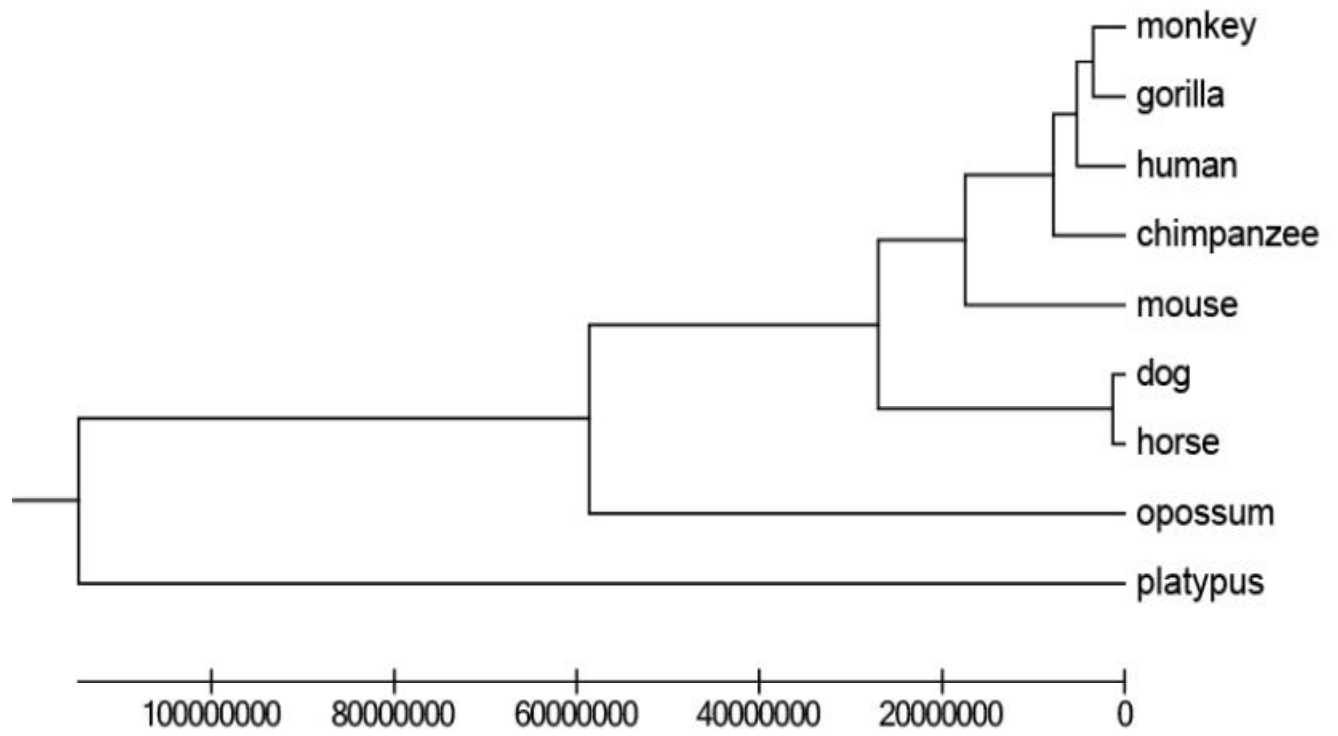

**Figure S19:** The phylogenetic tree of 9 mammals constructed using multiple encoding vector method[b].

## REFERENCE:-

- [a]:- Kumar, S., Stecher, G. & Tamura, K. Mega7: Molecular evolutionary genetics analysis version 7.0 for bigger datasets. *Mol. Biol. Evol.* 33, 1870–1874 (2016).
- [b]:- Li, Y., He, L., He, R. L. & Yau, S. S.-T. A novel fast vector method for genetic sequence comparison. *Sci. Reports* 7 (2017).
- [c]:- Hoang, T. et al. A new method to cluster dna sequences using fourier power spectrum. *J. Theor. Biol.* 372, 135 – 145 (2015).
- [d]:- Liu, L., Li, C., Bai, F., Zhao, Q. & Wang, Y. An optimization approach and its application to compare dna sequences. *J. Mol. Struct.* 1082, 49 – 55 (2015).
- [e]:- Yi, H. & Jin, L. Co-phylog: an assembly-free phylogenomic approach for closely related organisms. *Nucleic Acids Res.* 41, e75 (2013).
- [f]:- Leimeister, C.-A., Sohrabi-Jahromi, S. & Morgenstern, B. Fast and accurate phylogeny reconstruction using filtered spaced-word matches. *Bioinforma.* 33, 971–979 (2017).
- [g]:- Morgenstern, B., Zhu, B., Horwege, S. & Leimeister, C. A. Estimating evolutionary distances between genomic sequences from spaced-word matches. *Algorithms for Mol. Biol.* 10, 5 (2015).
