# Supplementary material for: Alignment-free method for DNA sequence clustering using Fuzzy integral similarity
Source: PubMed Central journal article supplement (PMC6403383; doi:10.1038/s41598-019-40452-6), 2019-03-06
Supplement: 41598_2019_40452_MOESM4_ESM.pdf [file 41598_2019_40452_MOESM4_ESM.pdf]

---

Alignment-free method for DNA sequence clustering using Fuzzy integral similarity

Ajay Kumar Saw<sup>1</sup>, Garima Raj<sup>2</sup>, Manashi Das<sup>3</sup>, Narayan C. Talukdar<sup>4</sup>, Binod Chandra Tripathy<sup>5</sup> and Soumyadeep Nandi<sup>6,\*</sup>  
1 Mathematical Sciences Division, Institute of Advanced Study in Science and Technology, Guwahati-35, Assam, India.

2,3,4,6 Life Science Division, Institute of Advanced Study in Science and Technology, Guwahati-35, Assam, India.

5 Mathematics Department, Tripura University, Tripura, India.

\* To whom correspondence should be addressed. Email: soumyadeep.nandi@gmail.com; snandi@iasst.gov.in

Distance matrices of datasets

11 arbuscular mycorrhizal fungi (AMF) isolates

| 11           |          |          |          |          |          |          |          |          |          |          |  |  |
|--------------|----------|----------|----------|----------|----------|----------|----------|----------|----------|----------|--|--|
| Human_____   | 0.000000 | 0.023016 | 0.020521 | 0.061930 | 0.046802 | 0.053064 | 0.039552 | 0.037216 | 0.057556 | 0.032068 |  |  |
| 0.131337     |          |          |          |          |          |          |          |          |          |          |  |  |
| Chimpanzee   | 0.023016 | 0.000000 | 0.008740 | 0.069335 | 0.054207 | 0.060469 | 0.046851 | 0.044262 | 0.064961 | 0.044645 |  |  |
| 0.130692     |          |          |          |          |          |          |          |          |          |          |  |  |
| Gorilla_____ | 0.020521 | 0.008740 | 0.000000 | 0.065996 | 0.050868 | 0.057130 | 0.043512 | 0.040923 | 0.061622 | 0.042150 |  |  |
| 0.121952     |          |          |          |          |          |          |          |          |          |          |  |  |
| Lemur_____   | 0.061930 | 0.069335 | 0.065996 | 0.000000 | 0.017649 | 0.010406 | 0.042528 | 0.041782 | 0.010308 | 0.032156 |  |  |
| 0.128092     |          |          |          |          |          |          |          |          |          |          |  |  |
| Rat_____     | 0.046802 | 0.054207 | 0.050868 | 0.017649 | 0.000000 | 0.007243 | 0.024879 | 0.024133 | 0.010754 | 0.027603 |  |  |
| 0.110443     |          |          |          |          |          |          |          |          |          |          |  |  |
| Mouse_____   | 0.053064 | 0.060469 | 0.057130 | 0.010406 | 0.007243 | 0.000000 | 0.032122 | 0.031376 | 0.004492 | 0.029276 |  |  |
| 0.117686     |          |          |          |          |          |          |          |          |          |          |  |  |
| Goat_____    | 0.039552 | 0.046851 | 0.043512 | 0.042528 | 0.024879 | 0.032122 | 0.000000 | 0.002588 | 0.032220 | 0.043172 |  |  |
| 0.091785     |          |          |          |          |          |          |          |          |          |          |  |  |
| Bovine_____  | 0.037216 | 0.044262 | 0.040923 | 0.041782 | 0.024133 | 0.031376 | 0.002588 | 0.000000 | 0.031474 | 0.040836 |  |  |
| 0.094121     |          |          |          |          |          |          |          |          |          |          |  |  |
| Rabbit_____  | 0.057556 | 0.064961 | 0.061622 | 0.010308 | 0.010754 | 0.004492 | 0.032220 | 0.031474 | 0.000000 | 0.032787 |  |  |
| 0.117784     |          |          |          |          |          |          |          |          |          |          |  |  |
| Opossum_____ | 0.032068 | 0.044645 | 0.042150 | 0.032156 | 0.027603 | 0.029276 | 0.043172 | 0.040836 | 0.032787 | 0.000000 |  |  |
| 0.134957     |          |          |          |          |          |          |          |          |          |          |  |  |
| Gallus_____  | 0.131337 | 0.130692 | 0.121952 | 0.128092 | 0.110443 | 0.117686 | 0.091785 | 0.094121 | 0.117784 | 0.134957 |  |  |
| 0.000000     |          |          |          |          |          |          |          |          |          |          |  |  |

16S rDNA sequences from 40 bacterial isolates

| 40      |          |          |          |          |          |          |          |          |          |          |    |  |  |
|---------|----------|----------|----------|----------|----------|----------|----------|----------|----------|----------|----|--|--|
| RN_d26  | 0.000000 | 0.104671 | 0.095211 | 0.030200 | 0.097044 | 0.030632 | 0.103956 | 0.029261 | 0.031093 | 0.093341 | 0. |  |  |
| 031258  | 0.100615 | 0.030517 | 0.044380 | 0.031528 | 0.031078 | 0.029591 | 0.035560 | 0.024883 | 0.030405 | 0.027638 | 0. |  |  |
| 069923  | 0.018017 | 0.095567 | 0.030898 | 0.029243 | 0.031251 | 0.043894 | 0.031969 | 0.092720 | 0.027435 | 0.103160 | 0. |  |  |
| 107309  | 0.102568 | 0.036746 | 0.025165 | 0.028148 | 0.103100 | 0.044800 | 0.097353 |          |          |          |    |  |  |
| IDO_d21 | 0.104671 | 0.000000 | 0.009460 | 0.084581 | 0.007627 | 0.085105 | 0.000717 | 0.084648 | 0.081583 | 0.013225 | 0. |  |  |
| 085540  | 0.004056 | 0.085567 | 0.099211 | 0.085900 | 0.078991 | 0.084622 | 0.090391 | 0.086343 | 0.085961 | 0.078198 | 0. |  |  |
| 034747  | 0.092974 | 0.009103 | 0.086336 | 0.085560 | 0.086201 | 0.098725 | 0.087328 | 0.011951 | 0.088322 | 0.001801 | 0. |  |  |
| 002845  | 0.003567 | 0.091577 | 0.085629 | 0.084992 | 0.003593 | 0.103556 | 0.014673 |          |          |          |    |  |  |
| RN_d17  | 0.095211 | 0.009460 | 0.000000 | 0.081913 | 0.005344 | 0.082684 | 0.008745 | 0.081930 | 0.079421 | 0.010522 | 0. |  |  |
| 083378  | 0.005404 | 0.082637 | 0.097049 | 0.082880 | 0.072512 | 0.082135 | 0.088229 | 0.077027 | 0.082548 | 0.076036 | 0. |  |  |
| 025287  | 0.083514 | 0.004287 | 0.083567 | 0.081912 | 0.077533 | 0.096563 | 0.084638 | 0.006747 | 0.080104 | 0.007949 | 0. |  |  |
| 012098  | 0.007357 | 0.089415 | 0.076559 | 0.077351 | 0.007889 | 0.097469 | 0.013247 |          |          |          |    |  |  |
| IDO_d10 | 0.030200 | 0.084581 | 0.081913 | 0.000000 | 0.081043 | 0.000771 | 0.084087 | 0.001397 | 0.006838 | 0.092435 | 0. |  |  |
| 001465  | 0.080525 | 0.000986 | 0.015136 | 0.001681 | 0.009401 | 0.000790 | 0.011578 | 0.005317 | 0.001380 | 0.007548 | 0. |  |  |
| 070319  | 0.013144 | 0.080439 | 0.001755 | 0.001158 | 0.007051 | 0.014650 | 0.002747 | 0.080229 | 0.006076 | 0.083070 | 0. |  |  |
| 087219  | 0.082478 | 0.007502 | 0.005354 | 0.013988 | 0.085649 | 0.018975 | 0.081135 |          |          |          |    |  |  |

|        |          |          |          |          |          |          |          |          |          |          |    |   |
|--------|----------|----------|----------|----------|----------|----------|----------|----------|----------|----------|----|---|
| IDO_d6 | 0.097044 | 0.007627 | 0.005344 | 0.081043 | 0.000000 | 0.081814 | 0.006912 | 0.081060 | 0.078551 | 0.011392 | 0. | ↻ |
| 082508 | 0.005617 | 0.081767 | 0.096179 | 0.082010 | 0.071642 | 0.081265 | 0.087359 | 0.078716 | 0.081678 | 0.075166 | 0. | ↻ |
| 027120 | 0.085347 | 0.001476 | 0.082697 | 0.081042 | 0.078574 | 0.095693 | 0.083768 | 0.004324 | 0.080695 | 0.008260 | 0. | ↻ |
| 010265 | 0.008239 | 0.088545 | 0.078002 | 0.077365 | 0.006056 | 0.096599 | 0.007903 |          |          |          |    |   |
| IDO_d5 | 0.030632 | 0.085105 | 0.082684 | 0.000771 | 0.081814 | 0.000000 | 0.084858 | 0.001829 | 0.007362 | 0.093206 | 0. | ↻ |
| 000694 | 0.081049 | 0.000462 | 0.014365 | 0.001494 | 0.010172 | 0.001041 | 0.011765 | 0.005749 | 0.000856 | 0.008072 | 0. | ↻ |
| 071090 | 0.013576 | 0.081210 | 0.001231 | 0.001590 | 0.006864 | 0.013879 | 0.002223 | 0.081000 | 0.006508 | 0.083594 | 0. | ↻ |
| 087743 | 0.083002 | 0.007139 | 0.006125 | 0.014420 | 0.086420 | 0.018451 | 0.081906 |          |          |          |    |   |
| RN_d3  | 0.103956 | 0.000717 | 0.008745 | 0.084087 | 0.006912 | 0.084858 | 0.000000 | 0.084104 | 0.081595 | 0.012508 | 0. | ↻ |
| 085552 | 0.003969 | 0.084852 | 0.099223 | 0.085185 | 0.078276 | 0.084309 | 0.090403 | 0.085628 | 0.085246 | 0.078210 | 0. | ↻ |
| 034032 | 0.092259 | 0.008388 | 0.085741 | 0.084845 | 0.085486 | 0.098737 | 0.086812 | 0.011236 | 0.087607 | 0.001990 | 0. | ↻ |
| 003562 | 0.003579 | 0.091589 | 0.084914 | 0.084277 | 0.002876 | 0.102841 | 0.013956 |          |          |          |    |   |
| TKW_56 | 0.029261 | 0.084648 | 0.081930 | 0.001397 | 0.081060 | 0.001829 | 0.084104 | 0.000000 | 0.006905 | 0.092452 | 0. | ↻ |
| 002455 | 0.080592 | 0.001927 | 0.015119 | 0.003027 | 0.009418 | 0.000788 | 0.010232 | 0.004902 | 0.002298 | 0.007615 | 0. | ↻ |
| 070336 | 0.011747 | 0.080456 | 0.001949 | 0.001169 | 0.008397 | 0.014633 | 0.002708 | 0.080246 | 0.004679 | 0.083137 | 0. | ↻ |
| 087286 | 0.082545 | 0.007485 | 0.005371 | 0.012591 | 0.085666 | 0.018908 | 0.081152 |          |          |          |    |   |
| TKW_53 | 0.031093 | 0.081583 | 0.079421 | 0.006838 | 0.078551 | 0.007362 | 0.081595 | 0.006905 | 0.000000 | 0.089943 | 0. | ↻ |
| 007078 | 0.077626 | 0.007824 | 0.018184 | 0.008157 | 0.008142 | 0.006879 | 0.008808 | 0.008600 | 0.008218 | 0.003538 | 0. | ↻ |
| 067827 | 0.015231 | 0.077947 | 0.008593 | 0.007817 | 0.010504 | 0.017142 | 0.009585 | 0.077737 | 0.010579 | 0.079782 | 0. | ↻ |
| 080381 | 0.078016 | 0.009994 | 0.007886 | 0.014881 | 0.083157 | 0.025813 | 0.078643 |          |          |          |    |   |
| TKW_52 | 0.093341 | 0.013225 | 0.010522 | 0.092435 | 0.011392 | 0.093206 | 0.012508 | 0.092452 | 0.089943 | 0.000000 | 0. | ↻ |
| 093900 | 0.012317 | 0.093159 | 0.107571 | 0.093402 | 0.083034 | 0.092657 | 0.098751 | 0.087549 | 0.093070 | 0.086558 | 0. | ↻ |
| 023417 | 0.081644 | 0.011996 | 0.094089 | 0.092434 | 0.088055 | 0.107085 | 0.095160 | 0.012206 | 0.090626 | 0.014498 | 0. | ↻ |
| 016070 | 0.014477 | 0.099937 | 0.087081 | 0.087873 | 0.009759 | 0.107991 | 0.016761 |          |          |          |    |   |
| TKW_51 | 0.031258 | 0.085540 | 0.083378 | 0.001465 | 0.082508 | 0.000694 | 0.085552 | 0.002455 | 0.007078 | 0.093900 | 0. | ↻ |
| 000000 | 0.081583 | 0.000746 | 0.013671 | 0.001846 | 0.010866 | 0.001667 | 0.011413 | 0.006375 | 0.001140 | 0.007788 | 0. | ↻ |
| 071784 | 0.014202 | 0.081904 | 0.001515 | 0.002216 | 0.007216 | 0.013185 | 0.002507 | 0.081694 | 0.007134 | 0.083739 | 0. | ↻ |
| 087459 | 0.082718 | 0.006787 | 0.006819 | 0.015046 | 0.087114 | 0.018735 | 0.082600 |          |          |          |    |   |
| FN_48  | 0.100615 | 0.004056 | 0.005404 | 0.080525 | 0.005617 | 0.081049 | 0.003969 | 0.080592 | 0.077626 | 0.012317 | 0. | ↻ |
| 081583 | 0.000000 | 0.081511 | 0.095254 | 0.081844 | 0.074935 | 0.080566 | 0.086434 | 0.082287 | 0.081905 | 0.074241 | 0. | ↻ |
| 030691 | 0.088918 | 0.005433 | 0.082280 | 0.081504 | 0.082145 | 0.094768 | 0.083272 | 0.009723 | 0.084266 | 0.002643 | 0. | ↻ |
| 006694 | 0.002622 | 0.087620 | 0.081573 | 0.080936 | 0.005531 | 0.099500 | 0.013303 |          |          |          |    |   |
| KEK_47 | 0.030517 | 0.085567 | 0.082637 | 0.000986 | 0.081767 | 0.000462 | 0.084852 | 0.001927 | 0.007824 | 0.093159 | 0. | ↻ |
| 000746 | 0.081511 | 0.000000 | 0.014412 | 0.001100 | 0.010125 | 0.001371 | 0.012159 | 0.005634 | 0.000394 | 0.008534 | 0. | ↻ |
| 071043 | 0.013461 | 0.081163 | 0.000930 | 0.001475 | 0.006470 | 0.013926 | 0.002001 | 0.080953 | 0.006393 | 0.084056 | 0. | ↻ |
| 088205 | 0.083464 | 0.007533 | 0.006078 | 0.014305 | 0.086373 | 0.017989 | 0.081859 |          |          |          |    |   |
| KEK_46 | 0.044380 | 0.099211 | 0.097049 | 0.015136 | 0.096179 | 0.014365 | 0.099223 | 0.015119 | 0.018184 | 0.107571 | 0. | ↻ |
| 013671 | 0.095254 | 0.014412 | 0.000000 | 0.014169 | 0.024537 | 0.014914 | 0.013465 | 0.020021 | 0.014501 | 0.021013 | 0. | ↻ |
| 085455 | 0.026363 | 0.095575 | 0.013482 | 0.015137 | 0.019516 | 0.005433 | 0.012411 | 0.095365 | 0.016945 | 0.097410 | 0. | ↻ |
| 098565 | 0.095644 | 0.008966 | 0.020490 | 0.019698 | 0.100785 | 0.007629 | 0.096271 |          |          |          |    |   |
| KEK_45 | 0.031528 | 0.085900 | 0.082880 | 0.001681 | 0.082010 | 0.001494 | 0.085185 | 0.003027 | 0.008157 | 0.093402 | 0. | ↻ |
| 001846 | 0.081844 | 0.001100 | 0.014169 | 0.000000 | 0.010368 | 0.002471 | 0.013259 | 0.006645 | 0.001123 | 0.008867 | 0. | ↻ |
| 071286 | 0.014472 | 0.081406 | 0.001078 | 0.002486 | 0.005370 | 0.013683 | 0.001758 | 0.081196 | 0.007404 | 0.084389 | 0. | ↻ |
| 088538 | 0.083797 | 0.008633 | 0.006363 | 0.015316 | 0.086616 | 0.017656 | 0.082102 |          |          |          |    |   |
| KEK_44 | 0.031078 | 0.078991 | 0.072512 | 0.009401 | 0.071642 | 0.010172 | 0.078276 | 0.009418 | 0.008142 | 0.083034 | 0. | ↻ |
| 010866 | 0.074935 | 0.010125 | 0.024537 | 0.010368 | 0.000000 | 0.009623 | 0.016267 | 0.007352 | 0.010036 | 0.009005 | 0. | ↻ |
| 060918 | 0.014022 | 0.071038 | 0.011055 | 0.009400 | 0.007210 | 0.024051 | 0.012126 | 0.070828 | 0.009331 | 0.077480 | 0. | ↻ |
| 081629 | 0.076888 | 0.016903 | 0.006638 | 0.014866 | 0.077420 | 0.024957 | 0.071734 |          |          |          |    |   |
| KEK_42 | 0.029591 | 0.084622 | 0.082135 | 0.000790 | 0.081265 | 0.001041 | 0.084309 | 0.000788 | 0.006879 | 0.092657 | 0. | ↻ |
| 001667 | 0.080566 | 0.001371 | 0.014914 | 0.002471 | 0.009623 | 0.000000 | 0.010788 | 0.005107 | 0.001742 | 0.007589 | 0. | ↻ |
| 070541 | 0.012535 | 0.080661 | 0.001714 | 0.000938 | 0.007841 | 0.014428 | 0.002706 | 0.080451 | 0.005467 | 0.083111 | 0. | ↻ |
| 087260 | 0.082519 | 0.007280 | 0.005576 | 0.013379 | 0.085871 | 0.018934 | 0.081357 |          |          |          |    |   |
| KJ_41  | 0.035560 | 0.090391 | 0.088229 | 0.011578 | 0.087359 | 0.011765 | 0.090403 | 0.010232 | 0.008808 | 0.098751 | 0. | ↻ |
| 011413 | 0.086434 | 0.012159 | 0.013465 | 0.013259 | 0.016267 | 0.010788 | 0.000000 | 0.012909 | 0.012530 | 0.012193 | 0. | ↻ |
| 076635 | 0.018055 | 0.086755 | 0.012181 | 0.011401 | 0.018629 | 0.017373 | 0.011780 | 0.086545 | 0.011053 | 0.088590 | 0. | ↻ |
| 088474 | 0.086824 | 0.004687 | 0.012946 | 0.010878 | 0.091965 | 0.017720 | 0.087451 |          |          |          |    |   |
| KJ_40  | 0.024883 | 0.086343 | 0.077027 | 0.005317 | 0.078716 | 0.005749 | 0.085628 | 0.004902 | 0.008600 | 0.087549 | 0. | ↻ |
| 006375 | 0.082287 | 0.005634 | 0.020021 | 0.006645 | 0.007352 | 0.005107 | 0.012909 | 0.000000 | 0.005522 | 0.009310 | 0. | ↻ |
| 065433 | 0.007827 | 0.077239 | 0.006539 | 0.004884 | 0.006368 | 0.019535 | 0.007610 | 0.075343 | 0.003076 | 0.084832 | 0. | ↻ |
| 088981 | 0.084240 | 0.012387 | 0.000714 | 0.010345 | 0.084772 | 0.020441 | 0.079025 |          |          |          |    |   |
| KJ_38  | 0.030405 | 0.085961 | 0.082548 | 0.001380 | 0.081678 | 0.000856 | 0.085246 | 0.002298 | 0.008218 | 0.093070 | 0. | ↻ |
| 001140 | 0.081905 | 0.000394 | 0.014501 | 0.001123 | 0.010036 | 0.001742 | 0.012530 | 0.005522 | 0.000000 | 0.008928 | 0. | ↻ |

|        |          |          |          |          |          |          |          |          |          |          |    |   |
|--------|----------|----------|----------|----------|----------|----------|----------|----------|----------|----------|----|---|
| 070954 | 0.013349 | 0.081074 | 0.001019 | 0.001363 | 0.006099 | 0.014015 | 0.002090 | 0.080864 | 0.006281 | 0.084450 | 0. | ↻ |
| 088599 | 0.083858 | 0.007904 | 0.005989 | 0.014193 | 0.086284 | 0.017595 | 0.081770 |          |          |          |    |   |
| KJ_37  | 0.027638 | 0.078198 | 0.076036 | 0.007548 | 0.075166 | 0.008072 | 0.078210 | 0.007615 | 0.003538 | 0.086558 | 0. | ↻ |
| 007788 | 0.074241 | 0.008534 | 0.021013 | 0.008867 | 0.009005 | 0.007589 | 0.012193 | 0.009310 | 0.008928 | 0.000000 | 0. | ↻ |
| 064442 | 0.015941 | 0.074562 | 0.009303 | 0.008527 | 0.011367 | 0.020527 | 0.010295 | 0.074352 | 0.011289 | 0.076397 | 0. | ↻ |
| 079671 | 0.074930 | 0.013379 | 0.008596 | 0.011343 | 0.079772 | 0.026523 | 0.075258 |          |          |          |    |   |
| KJ_36  | 0.069923 | 0.034747 | 0.025287 | 0.070319 | 0.027120 | 0.071090 | 0.034032 | 0.070336 | 0.067827 | 0.023417 | 0. | ↻ |
| 071784 | 0.030691 | 0.071043 | 0.085455 | 0.071286 | 0.060918 | 0.070541 | 0.076635 | 0.065433 | 0.070954 | 0.064442 | 0. | ↻ |
| 000000 | 0.059092 | 0.025644 | 0.071973 | 0.070318 | 0.065939 | 0.084969 | 0.073044 | 0.022796 | 0.068510 | 0.033236 | 0. | ↻ |
| 037385 | 0.032644 | 0.077821 | 0.064965 | 0.065757 | 0.033176 | 0.085875 | 0.027429 |          |          |          |    |   |
| KJ_35  | 0.018017 | 0.092974 | 0.083514 | 0.013144 | 0.085347 | 0.013576 | 0.092259 | 0.011747 | 0.015231 | 0.081644 | 0. | ↻ |
| 014202 | 0.088918 | 0.013461 | 0.026363 | 0.014472 | 0.014022 | 0.012535 | 0.018055 | 0.007827 | 0.013349 | 0.015941 | 0. | ↻ |
| 059092 | 0.000000 | 0.083870 | 0.013645 | 0.011986 | 0.014195 | 0.025877 | 0.013952 | 0.081023 | 0.009418 | 0.091463 | 0. | ↻ |
| 095612 | 0.090871 | 0.018729 | 0.008109 | 0.015491 | 0.091403 | 0.026783 | 0.085656 |          |          |          |    |   |
| KJ_34  | 0.095567 | 0.009103 | 0.004287 | 0.080439 | 0.001476 | 0.081210 | 0.008388 | 0.080456 | 0.077947 | 0.011996 | 0. | ↻ |
| 081904 | 0.005433 | 0.081163 | 0.095575 | 0.081406 | 0.071038 | 0.080661 | 0.086755 | 0.077239 | 0.081074 | 0.074562 | 0. | ↻ |
| 025644 | 0.083870 | 0.000000 | 0.082093 | 0.080438 | 0.077097 | 0.095089 | 0.083164 | 0.004290 | 0.079218 | 0.008076 | 0. | ↻ |
| 011741 | 0.008055 | 0.087941 | 0.076525 | 0.075888 | 0.007532 | 0.095995 | 0.008959 |          |          |          |    |   |
| TKW_33 | 0.030898 | 0.086336 | 0.083567 | 0.001755 | 0.082697 | 0.001231 | 0.085741 | 0.001949 | 0.008593 | 0.094089 | 0. | ↻ |
| 001515 | 0.082280 | 0.000930 | 0.013482 | 0.001078 | 0.011055 | 0.001714 | 0.012181 | 0.006539 | 0.001019 | 0.009303 | 0. | ↻ |
| 071973 | 0.013645 | 0.082093 | 0.000000 | 0.001659 | 0.006448 | 0.012996 | 0.001071 | 0.081883 | 0.006577 | 0.084825 | 0. | ↻ |
| 088974 | 0.084233 | 0.007555 | 0.007008 | 0.014489 | 0.087303 | 0.017220 | 0.082789 |          |          |          |    |   |
| TKW_32 | 0.029243 | 0.085560 | 0.081912 | 0.001158 | 0.081042 | 0.001590 | 0.084845 | 0.001169 | 0.007817 | 0.092434 | 0. | ↻ |
| 002216 | 0.081504 | 0.001475 | 0.015137 | 0.002486 | 0.009400 | 0.000938 | 0.011401 | 0.004884 | 0.001363 | 0.008527 | 0. | ↻ |
| 070318 | 0.011986 | 0.080438 | 0.001659 | 0.000000 | 0.007227 | 0.014651 | 0.002726 | 0.080228 | 0.004918 | 0.084049 | 0. | ↻ |
| 088198 | 0.083457 | 0.007503 | 0.005353 | 0.012830 | 0.085648 | 0.017996 | 0.081134 |          |          |          |    |   |
| TKW_31 | 0.031251 | 0.086201 | 0.077533 | 0.007051 | 0.078574 | 0.006864 | 0.085486 | 0.008397 | 0.010504 | 0.088055 | 0. | ↻ |
| 007216 | 0.082145 | 0.006470 | 0.019516 | 0.005370 | 0.007210 | 0.007841 | 0.018629 | 0.006368 | 0.006099 | 0.011367 | 0. | ↻ |
| 065939 | 0.014195 | 0.077097 | 0.006448 | 0.007227 | 0.000000 | 0.019030 | 0.007105 | 0.075849 | 0.007576 | 0.084690 | 0. | ↻ |
| 088839 | 0.084098 | 0.014003 | 0.006086 | 0.016065 | 0.084630 | 0.019936 | 0.078883 |          |          |          |    |   |
| TKW_29 | 0.043894 | 0.098725 | 0.096563 | 0.014650 | 0.095693 | 0.013879 | 0.098737 | 0.014633 | 0.017142 | 0.107085 | 0. | ↻ |
| 013185 | 0.094768 | 0.013926 | 0.005433 | 0.013683 | 0.024051 | 0.014428 | 0.017373 | 0.019535 | 0.014015 | 0.020527 | 0. | ↻ |
| 084969 | 0.025877 | 0.095089 | 0.012996 | 0.014651 | 0.019030 | 0.000000 | 0.011925 | 0.094879 | 0.016931 | 0.096924 | 0. | ↻ |
| 096362 | 0.095158 | 0.012686 | 0.020004 | 0.024843 | 0.100299 | 0.013062 | 0.095785 |          |          |          |    |   |
| TKW_28 | 0.031969 | 0.087328 | 0.084638 | 0.002747 | 0.083768 | 0.002223 | 0.086812 | 0.002708 | 0.009585 | 0.095160 | 0. | ↻ |
| 002507 | 0.083272 | 0.002001 | 0.012411 | 0.001758 | 0.012126 | 0.002706 | 0.011780 | 0.007610 | 0.002090 | 0.010295 | 0. | ↻ |
| 073044 | 0.013952 | 0.083164 | 0.001071 | 0.002726 | 0.007105 | 0.011925 | 0.000000 | 0.082954 | 0.006256 | 0.085817 | 0. | ↻ |
| 089966 | 0.085225 | 0.007154 | 0.008079 | 0.014168 | 0.088374 | 0.016228 | 0.083860 |          |          |          |    |   |
| TKW_27 | 0.092720 | 0.011951 | 0.006747 | 0.080229 | 0.004324 | 0.081000 | 0.011236 | 0.080246 | 0.077737 | 0.012206 | 0. | ↻ |
| 081694 | 0.009723 | 0.080953 | 0.095365 | 0.081196 | 0.070828 | 0.080451 | 0.086545 | 0.075343 | 0.080864 | 0.074352 | 0. | ↻ |
| 022796 | 0.081023 | 0.004290 | 0.081883 | 0.080228 | 0.075849 | 0.094879 | 0.082954 | 0.000000 | 0.078420 | 0.012366 | 0. | ↻ |
| 014589 | 0.012345 | 0.087731 | 0.074875 | 0.075667 | 0.010380 | 0.095785 | 0.007307 |          |          |          |    |   |
| FN_24  | 0.027435 | 0.088322 | 0.080104 | 0.006076 | 0.080695 | 0.006508 | 0.087607 | 0.004679 | 0.010579 | 0.090626 | 0. | ↻ |
| 007134 | 0.084266 | 0.006393 | 0.016945 | 0.007404 | 0.009331 | 0.005467 | 0.011053 | 0.003076 | 0.006281 | 0.011289 | 0. | ↻ |
| 068510 | 0.009418 | 0.079218 | 0.006577 | 0.004918 | 0.007576 | 0.016931 | 0.006256 | 0.078420 | 0.000000 | 0.086811 | 0. | ↻ |
| 090960 | 0.086219 | 0.009311 | 0.003545 | 0.008489 | 0.086751 | 0.017365 | 0.081004 |          |          |          |    |   |
| FN_23  | 0.103160 | 0.001801 | 0.007949 | 0.083070 | 0.008260 | 0.083594 | 0.001990 | 0.083137 | 0.079782 | 0.014498 | 0. | ↻ |
| 083739 | 0.002643 | 0.084056 | 0.097410 | 0.084389 | 0.077480 | 0.083111 | 0.088590 | 0.084832 | 0.084450 | 0.076397 | 0. | ↻ |
| 033236 | 0.091463 | 0.008076 | 0.084825 | 0.084049 | 0.084690 | 0.096924 | 0.085817 | 0.012366 | 0.086811 | 0.000000 | 0. | ↻ |
| 004149 | 0.001766 | 0.089776 | 0.084118 | 0.083481 | 0.004866 | 0.102045 | 0.015946 |          |          |          |    |   |
| RN_17  | 0.107309 | 0.002845 | 0.012098 | 0.087219 | 0.010265 | 0.087743 | 0.003562 | 0.087286 | 0.080381 | 0.016070 | 0. | ↻ |
| 087459 | 0.006694 | 0.088205 | 0.098565 | 0.088538 | 0.081629 | 0.087260 | 0.088474 | 0.088981 | 0.088599 | 0.079671 | 0. | ↻ |
| 037385 | 0.095612 | 0.011741 | 0.088974 | 0.088198 | 0.088839 | 0.096362 | 0.089966 | 0.014589 | 0.090960 | 0.004149 | 0. | ↻ |
| 000000 | 0.004741 | 0.089599 | 0.088267 | 0.087630 | 0.006438 | 0.106194 | 0.017518 |          |          |          |    |   |
| IDO_15 | 0.102568 | 0.003567 | 0.007357 | 0.082478 | 0.008239 | 0.083002 | 0.003579 | 0.082545 | 0.078016 | 0.014477 | 0. | ↻ |
| 082718 | 0.002622 | 0.083464 | 0.095644 | 0.083797 | 0.076888 | 0.082519 | 0.086824 | 0.084240 | 0.083858 | 0.074930 | 0. | ↻ |
| 032644 | 0.090871 | 0.008055 | 0.084233 | 0.083457 | 0.084098 | 0.095158 | 0.085225 | 0.012345 | 0.086219 | 0.001766 | 0. | ↻ |
| 004741 | 0.000000 | 0.088010 | 0.083526 | 0.082889 | 0.005141 | 0.101453 | 0.015925 |          |          |          |    |   |
| IDO_14 | 0.036746 | 0.091577 | 0.089415 | 0.007502 | 0.088545 | 0.007139 | 0.091589 | 0.007485 | 0.009994 | 0.099937 | 0. | ↻ |
| 006787 | 0.087620 | 0.007533 | 0.008966 | 0.008633 | 0.016903 | 0.007280 | 0.004687 | 0.012387 | 0.007904 | 0.013379 | 0. | ↻ |
| 077821 | 0.018729 | 0.087941 | 0.007555 | 0.007503 | 0.014003 | 0.012686 | 0.007154 | 0.087731 | 0.009311 | 0.089776 | 0. | ↻ |
| 089599 | 0.088010 | 0.000000 | 0.012856 | 0.012157 | 0.093151 | 0.016595 | 0.088637 |          |          |          |    |   |

|        |          |          |          |          |          |          |          |          |          |          |    |
|--------|----------|----------|----------|----------|----------|----------|----------|----------|----------|----------|----|
| FN_10  | 0.025165 | 0.085629 | 0.076559 | 0.005354 | 0.078002 | 0.006125 | 0.084914 | 0.005371 | 0.007886 | 0.087081 | 0. |
| 006819 | 0.081573 | 0.006078 | 0.020490 | 0.006363 | 0.006638 | 0.005576 | 0.012946 | 0.000714 | 0.005989 | 0.008596 | 0. |
| 064965 | 0.008109 | 0.076525 | 0.007008 | 0.005353 | 0.006086 | 0.020004 | 0.008079 | 0.074875 | 0.003545 | 0.084118 | 0. |
| 088267 | 0.083526 | 0.012856 | 0.000000 | 0.010382 | 0.084058 | 0.020910 | 0.078311 |          |          |          |    |
| KJ_6   | 0.028148 | 0.084992 | 0.077351 | 0.013988 | 0.077365 | 0.014420 | 0.084277 | 0.012591 | 0.014881 | 0.087873 | 0. |
| 015046 | 0.080936 | 0.014305 | 0.019698 | 0.015316 | 0.014866 | 0.013379 | 0.010878 | 0.010345 | 0.014193 | 0.011343 | 0. |
| 065757 | 0.015491 | 0.075888 | 0.014489 | 0.012830 | 0.016065 | 0.024843 | 0.014168 | 0.075667 | 0.008489 | 0.083481 | 0. |
| 087630 | 0.082889 | 0.012157 | 0.010382 | 0.000000 | 0.083421 | 0.020118 | 0.077674 |          |          |          |    |
| KJ_5   | 0.103100 | 0.003593 | 0.007889 | 0.085649 | 0.006056 | 0.086420 | 0.002876 | 0.085666 | 0.083157 | 0.009759 | 0. |
| 087114 | 0.005531 | 0.086373 | 0.100785 | 0.086616 | 0.077420 | 0.085871 | 0.091965 | 0.084772 | 0.086284 | 0.079772 | 0. |
| 033176 | 0.091403 | 0.007532 | 0.087303 | 0.085648 | 0.084630 | 0.100299 | 0.088374 | 0.010380 | 0.086751 | 0.004866 | 0. |
| 006438 | 0.005141 | 0.093151 | 0.084058 | 0.083421 | 0.000000 | 0.101985 | 0.011080 |          |          |          |    |
| KJ_3   | 0.044800 | 0.103556 | 0.097469 | 0.018975 | 0.096599 | 0.018451 | 0.102841 | 0.018908 | 0.025813 | 0.107991 | 0. |
| 018735 | 0.099500 | 0.017989 | 0.007629 | 0.017656 | 0.024957 | 0.018934 | 0.017720 | 0.020441 | 0.017595 | 0.026523 | 0. |
| 085875 | 0.026783 | 0.095995 | 0.017220 | 0.017996 | 0.019936 | 0.013062 | 0.016228 | 0.095785 | 0.017365 | 0.102045 | 0. |
| 106194 | 0.101453 | 0.016595 | 0.020910 | 0.020118 | 0.101985 | 0.000000 | 0.096691 |          |          |          |    |
| KJ_2   | 0.097353 | 0.014673 | 0.013247 | 0.081135 | 0.007903 | 0.081906 | 0.013956 | 0.081152 | 0.078643 | 0.016761 | 0. |
| 082600 | 0.013303 | 0.081859 | 0.096271 | 0.082102 | 0.071734 | 0.081357 | 0.087451 | 0.079025 | 0.081770 | 0.075258 | 0. |
| 027429 | 0.085656 | 0.008959 | 0.082789 | 0.081134 | 0.078883 | 0.095785 | 0.083860 | 0.007307 | 0.081004 | 0.015946 | 0. |
| 017518 | 0.015925 | 0.088637 | 0.078311 | 0.077674 | 0.011080 | 0.096691 | 0.000000 |          |          |          |    |

41 mammalian mitochondrial genomes

41

|            |          |          |          |          |          |          |          |          |          |          |    |
|------------|----------|----------|----------|----------|----------|----------|----------|----------|----------|----------|----|
| V00662.1_H | 0.000000 | 0.005647 | 0.004698 | 0.005499 | 0.007525 | 0.006899 | 0.010812 | 0.012034 | 0.015085 | 0.050534 | 0. |
| 0.057299   | 0.049565 | 0.054271 | 0.053199 | 0.053056 | 0.049602 | 0.058088 | 0.046769 | 0.046656 | 0.037272 | 0.032749 | 0. |
| 058365     | 0.056521 | 0.057004 | 0.074368 | 0.046580 | 0.111624 | 0.010720 | 0.067591 | 0.076702 | 0.036389 | 0.031185 | 0. |
| 048240     | 0.052870 | 0.023311 | 0.039554 | 0.030523 | 0.027037 | 0.035193 | 0.033313 | 0.045874 |          |          |    |
| D38116.1_P | 0.005647 | 0.000000 | 0.001945 | 0.004966 | 0.013172 | 0.004251 | 0.006713 | 0.017478 | 0.020529 | 0.045090 | 0. |
| 0.051855   | 0.044121 | 0.048827 | 0.047755 | 0.047612 | 0.044158 | 0.052644 | 0.041325 | 0.041212 | 0.031828 | 0.027305 | 0. |
| 052921     | 0.051077 | 0.051560 | 0.068924 | 0.041136 | 0.106180 | 0.006621 | 0.062147 | 0.071258 | 0.030945 | 0.025741 | 0. |
| 042796     | 0.047426 | 0.017867 | 0.034110 | 0.025079 | 0.021593 | 0.029749 | 0.027869 | 0.040430 |          |          |    |
| D38113.1_P | 0.004698 | 0.001945 | 0.000000 | 0.003145 | 0.012223 | 0.003105 | 0.008658 | 0.016404 | 0.019455 | 0.046163 | 0. |
| 0.052928   | 0.045194 | 0.049900 | 0.048828 | 0.048685 | 0.045231 | 0.053717 | 0.042398 | 0.042285 | 0.032901 | 0.028378 | 0. |
| 053994     | 0.052150 | 0.052633 | 0.069997 | 0.042209 | 0.107254 | 0.008566 | 0.063220 | 0.072331 | 0.032018 | 0.026814 | 0. |
| 043869     | 0.048499 | 0.018940 | 0.035183 | 0.026152 | 0.022666 | 0.030822 | 0.028942 | 0.041503 |          |          |    |
| D38114.1_G | 0.005499 | 0.004966 | 0.003145 | 0.000000 | 0.012396 | 0.005295 | 0.010848 | 0.017533 | 0.020584 | 0.045035 | 0. |
| 0.051800   | 0.044066 | 0.048772 | 0.047700 | 0.047557 | 0.044103 | 0.052589 | 0.041270 | 0.041157 | 0.031773 | 0.027250 | 0. |
| 052866     | 0.051022 | 0.051505 | 0.068869 | 0.041081 | 0.106125 | 0.010756 | 0.062092 | 0.071203 | 0.030890 | 0.025686 | 0. |
| 042741     | 0.047371 | 0.017812 | 0.034055 | 0.025024 | 0.021538 | 0.029694 | 0.027814 | 0.040375 |          |          |    |
| X99256.1_H | 0.007525 | 0.013172 | 0.012223 | 0.012396 | 0.000000 | 0.012079 | 0.015221 | 0.006854 | 0.009905 | 0.055714 | 0. |
| 0.062479   | 0.054745 | 0.059451 | 0.058379 | 0.058236 | 0.054782 | 0.063268 | 0.051949 | 0.051836 | 0.042452 | 0.037929 | 0. |
| 063545     | 0.061701 | 0.062184 | 0.079548 | 0.051760 | 0.116804 | 0.014486 | 0.072771 | 0.081882 | 0.041569 | 0.036365 | 0. |
| 053420     | 0.058050 | 0.028491 | 0.044734 | 0.035703 | 0.032217 | 0.040373 | 0.038493 | 0.051054 |          |          |    |
| Y18001.1_P | 0.006899 | 0.004251 | 0.003105 | 0.005295 | 0.012079 | 0.000000 | 0.006212 | 0.018933 | 0.021984 | 0.043634 | 0. |
| 0.050399   | 0.042665 | 0.047371 | 0.046299 | 0.046156 | 0.042702 | 0.051188 | 0.039869 | 0.039756 | 0.030372 | 0.025849 | 0. |
| 051465     | 0.049621 | 0.050104 | 0.067468 | 0.039680 | 0.104724 | 0.005461 | 0.060691 | 0.069802 | 0.029489 | 0.024285 | 0. |
| 041340     | 0.045970 | 0.016411 | 0.032654 | 0.023623 | 0.020137 | 0.028293 | 0.026413 | 0.038974 |          |          |    |
| AY863426.1 | 0.010812 | 0.006713 | 0.008658 | 0.010848 | 0.015221 | 0.006212 | 0.000000 | 0.022075 | 0.025126 | 0.040493 | 0. |
| 0.047258   | 0.039524 | 0.044230 | 0.043158 | 0.043015 | 0.039561 | 0.048047 | 0.036728 | 0.036615 | 0.027231 | 0.022708 | 0. |
| 048324     | 0.046480 | 0.046963 | 0.064327 | 0.036539 | 0.101583 | 0.003149 | 0.057550 | 0.066661 | 0.026348 | 0.021144 | 0. |
| 038199     | 0.042829 | 0.013270 | 0.029513 | 0.020482 | 0.016996 | 0.025152 | 0.023272 | 0.035833 |          |          |    |
| D38115.1_P | 0.012034 | 0.017478 | 0.016404 | 0.017533 | 0.006854 | 0.018933 | 0.022075 | 0.000000 | 0.003051 | 0.062568 | 0. |
| 0.069333   | 0.061599 | 0.066305 | 0.065233 | 0.065090 | 0.061636 | 0.070122 | 0.058803 | 0.058690 | 0.049306 | 0.044783 | 0. |
| 070399     | 0.068555 | 0.069038 | 0.086402 | 0.058614 | 0.123658 | 0.021340 | 0.079625 | 0.088736 | 0.048423 | 0.043219 | 0. |
| 060274     | 0.064904 | 0.035345 | 0.051588 | 0.042557 | 0.039071 | 0.047227 | 0.045347 | 0.057908 |          |          |    |
| NC_002083. | 0.015085 | 0.020529 | 0.019455 | 0.020584 | 0.009905 | 0.021984 | 0.025126 | 0.003051 | 0.000000 | 0.065619 | 0. |
| 0.072384   | 0.064650 | 0.069356 | 0.068284 | 0.068141 | 0.064687 | 0.073173 | 0.061854 | 0.061741 | 0.052357 | 0.047834 | 0. |
| 073450     | 0.071606 | 0.072089 | 0.089453 | 0.061665 | 0.126709 | 0.024391 | 0.082676 | 0.091787 | 0.051474 | 0.046270 | 0. |
| 063325     | 0.067955 | 0.038396 | 0.054639 | 0.045608 | 0.042122 | 0.050278 | 0.048398 | 0.060959 |          |          |    |

U20753.1\_F 0.050534 0.045090 0.046163 0.045035 0.055714 0.043634 0.040493 0.062568 0.065619 0.000000 0.016405 0.021235 0.010775 0.009902 0.008239 0.005572 0.016204 0.006992 0.007741 0.014825 0.017785 0.013461 0.016957 0.017197 0.023834 0.012301 0.062905 0.041228 0.037804 0.042845 0.014145 0.019349 0.010285 0.020183 0.027223 0.010980 0.020011 0.023497 0.016484 0.017220 0.008112

U96639.2\_C 0.057299 0.051855 0.052928 0.051800 0.062479 0.050399 0.047258 0.069333 0.072384 0.016405 0.000000 0.030869 0.020409 0.018421 0.017873 0.019698 0.001607 0.017575 0.016513 0.025455 0.029776 0.012750 0.015781 0.016749 0.017069 0.010719 0.054325 0.047993 0.021399 0.026440 0.021323 0.026982 0.019665 0.029817 0.033988 0.019916 0.027695 0.030262 0.022106 0.025271 0.021164

AJ002189.1 0.049565 0.044121 0.045194 0.044066 0.054745 0.042665 0.039524 0.061599 0.064650 0.021235 0.030869 0.000000 0.016402 0.017024 0.014384 0.015663 0.031485 0.028227 0.028976 0.012293 0.016816 0.034696 0.038192 0.038432 0.036938 0.032309 0.076149 0.040259 0.051048 0.056089 0.019481 0.020460 0.011204 0.003882 0.026254 0.020316 0.019679 0.025515 0.017731 0.020197 0.013123

AF010406.1 0.054271 0.048827 0.049900 0.048772 0.059451 0.047371 0.044230 0.066305 0.069356 0.010775 0.020409 0.016402 0.000000 0.001988 0.003339 0.006985 0.021025 0.017767 0.018516 0.016999 0.021522 0.024236 0.027732 0.027972 0.020536 0.021849 0.059747 0.044965 0.034646 0.039687 0.017882 0.023086 0.006031 0.012520 0.030960 0.014717 0.023748 0.027234 0.019078 0.020957 0.008397

AF533441.1 0.053199 0.047755 0.048828 0.047700 0.058379 0.046299 0.043158 0.065233 0.068284 0.009902 0.018421 0.017024 0.001988 0.000000 0.003045 0.007073 0.019037 0.015779 0.016528 0.015927 0.020450 0.022646 0.025744 0.026645 0.021169 0.019861 0.059125 0.043893 0.034024 0.039065 0.016810 0.022014 0.005820 0.013142 0.029888 0.013645 0.022676 0.026162 0.018006 0.019885 0.008539

V00654.1\_B 0.053056 0.047612 0.048685 0.047557 0.058236 0.046156 0.043015 0.065090 0.068141 0.008239 0.017873 0.014384 0.003339 0.003045 0.000000 0.004433 0.018489 0.015231 0.015980 0.015784 0.020307 0.021700 0.025196 0.025436 0.022554 0.019313 0.061765 0.043750 0.036664 0.041705 0.016667 0.021871 0.004816 0.011944 0.029745 0.013502 0.022533 0.026019 0.017863 0.019742 0.007182

AY488491.1 0.049602 0.044158 0.045231 0.044103 0.054782 0.042702 0.039561 0.061636 0.064687 0.005572 0.019698 0.015663 0.006985 0.007073 0.004433 0.000000 0.019497 0.012564 0.013313 0.012330 0.016853 0.019033 0.022529 0.022769 0.026987 0.016646 0.066198 0.040296 0.041097 0.046138 0.013213 0.018417 0.007074 0.014611 0.026291 0.010048 0.019079 0.022565 0.014409 0.016288 0.004802

EU442884.2 0.058088 0.052644 0.053717 0.052589 0.063268 0.051188 0.048047 0.070122 0.073173 0.016204 0.001607 0.031485 0.021025 0.019037 0.018489 0.019497 0.000000 0.017374 0.016312 0.025254 0.029575 0.011143 0.014174 0.015142 0.016280 0.011508 0.053536 0.048782 0.021600 0.026641 0.021699 0.026903 0.020281 0.030433 0.034777 0.019715 0.027565 0.031051 0.022895 0.025070 0.020963

EF551003.1 0.046769 0.041325 0.042398 0.041270 0.051949 0.039869 0.036728 0.058803 0.061854 0.006992 0.017575 0.028227 0.017767 0.015779 0.015231 0.012564 0.017374 0.000000 0.001062 0.019221 0.016990 0.011596 0.011378 0.012346 0.027599 0.013471 0.064855 0.037463 0.038974 0.044015 0.015377 0.015584 0.017023 0.027175 0.023458 0.012784 0.016246 0.019732 0.020880 0.013788 0.015104

EF551002.1 0.046656 0.041212 0.042285 0.041157 0.051836 0.039756 0.036615 0.058690 0.061741 0.007741 0.016513 0.028976 0.018516 0.016528 0.015980 0.013313 0.016312 0.001062 0.000000 0.018796 0.016565 0.011709 0.011804 0.012772 0.027712 0.012409 0.064968 0.037350 0.037912 0.042953 0.014952 0.015471 0.017772 0.027924 0.023345 0.012359 0.016133 0.019619 0.020455 0.013363 0.015853

X97336.1\_R 0.037272 0.031828 0.032901 0.031773 0.042452 0.030372 0.027231 0.049306 0.052357 0.014825 0.025455 0.012293 0.016999 0.015927 0.015784 0.012330 0.025254 0.019221 0.018796 0.000000 0.004523 0.027569 0.030600 0.031568 0.037096 0.021687 0.074352 0.027966 0.046854 0.051895 0.008859 0.009838 0.010968 0.015598 0.013961 0.009694 0.009057 0.014893 0.007110 0.009575 0.008602

Y07726.1\_C 0.032749 0.027305 0.028378 0.027250 0.037929 0.025849 0.022708 0.044783 0.047834 0.017785 0.029776 0.016816 0.021522 0.020450 0.020307 0.016853 0.029575 0.016990 0.016565 0.004523 0.000000 0.025616 0.028369 0.029337 0.041619 0.025672 0.078875 0.023443 0.051175 0.056216 0.008453 0.007405 0.015491 0.020121 0.010494 0.009860 0.006624 0.012460 0.011011 0.007142 0.013125

DQ402478.1 0.058365 0.052921 0.053994 0.052866 0.063545 0.051465 0.048324 0.070399 0.073450 0.013461 0.012750 0.034696 0.024236 0.022646 0.021700 0.019033 0.011143 0.011596 0.011709 0.027569 0.025616 0.000000 0.003496 0.003998 0.016003 0.017925 0.054358 0.049059 0.029257 0.034298 0.023725 0.027180 0.023492 0.033644 0.035054 0.021132 0.027842 0.031328 0.029228 0.025051 0.021573

AF303110.1 0.056521 0.051077 0.052150 0.051022 0.061701 0.049621 0.046480 0.068555 0.071606 0.016957 0.015781 0.038192 0.027732 0.025744 0.025196 0.022529 0.014174 0.011378 0.011804 0.030600 0.028369 0.003496 0.000000 0.000968 0.017847 0.020955 0.055736 0.047215 0.031768 0.035676 0.026756 0.025336 0.026988 0.037140 0.033210 0.024163 0.026051 0.029484 0.032259 0.025167 0.025069

AF303111.1 0.057004 0.051560 0.052633 0.051505 0.062184 0.050104 0.046963 0.069038 0.072089 0.017197 0.016749 0.038432 0.027972 0.026645 0.025436 0.022769 0.015142 0.012346 0.012772 0.031568 0.029337 0.003998 0.000968 0.000000 0.017364 0.021923 0.055981 0.047698 0.032736 0.035921 0.027724 0.026289 0.027228 0.037380 0.033693 0.025131 0.027019 0.029967 0.033227 0.026135 0.025309

EF212882.1 0.074368 0.068924 0.069997 0.068869 0.079548 0.067468 0.064327 0.086402 0.089453 0.023834 0.017069 0.036938 0.020536 0.021169 0.022554 0.026987 0.016280 0.027599 0.027712 0.037096 0.041619 0.

|            |          |          |          |          |          |          |          |          |          |          |    |   |
|------------|----------|----------|----------|----------|----------|----------|----------|----------|----------|----------|----|---|
| 016003     | 0.017847 | 0.017364 | 0.000000 | 0.027788 | 0.039211 | 0.065062 | 0.024440 | 0.023656 | 0.037979 | 0.043183 | 0. | ↰ |
| 026128     | 0.033056 | 0.051057 | 0.034814 | 0.043845 | 0.047331 | 0.039175 | 0.041054 | 0.028494 |          |          |    |   |
| AJ001588.1 | 0.046580 | 0.041136 | 0.042209 | 0.041081 | 0.051760 | 0.039680 | 0.036539 | 0.058614 | 0.061665 | 0.012301 |    | ↰ |
| 0.010719   | 0.032309 | 0.021849 | 0.019861 | 0.019313 | 0.016646 | 0.011508 | 0.013471 | 0.012409 | 0.021687 | 0.025672 | 0. | ↰ |
| 017925     | 0.020955 | 0.021923 | 0.027788 | 0.000000 | 0.065044 | 0.037274 | 0.025502 | 0.030544 | 0.017219 | 0.022878 | 0. | ↰ |
| 021105     | 0.031257 | 0.027609 | 0.015812 | 0.023591 | 0.024272 | 0.014661 | 0.021167 | 0.019186 |          |          |    |   |
| X88898.2_E | 0.111624 | 0.106180 | 0.107254 | 0.106125 | 0.116804 | 0.104724 | 0.101583 | 0.123658 | 0.126709 | 0.062905 |    | ↰ |
| 0.054325   | 0.076149 | 0.059747 | 0.059125 | 0.061765 | 0.066198 | 0.053536 | 0.064855 | 0.064968 | 0.074352 | 0.078875 | 0. | ↰ |
| 054358     | 0.055736 | 0.055981 | 0.039211 | 0.065044 | 0.000000 | 0.102318 | 0.044033 | 0.034922 | 0.075235 | 0.080439 | 0. | ↰ |
| 064945     | 0.072267 | 0.088313 | 0.072070 | 0.081101 | 0.084587 | 0.076431 | 0.078310 | 0.067664 |          |          |    |   |
| NC_002764. | 0.010720 | 0.006621 | 0.008566 | 0.010756 | 0.014486 | 0.005461 | 0.003149 | 0.021340 | 0.024391 | 0.041228 |    | ↰ |
| 0.047993   | 0.040259 | 0.044965 | 0.043893 | 0.043750 | 0.040296 | 0.048782 | 0.037463 | 0.037350 | 0.027966 | 0.023443 | 0. | ↰ |
| 049059     | 0.047215 | 0.047698 | 0.065062 | 0.037274 | 0.102318 | 0.000000 | 0.059174 | 0.067396 | 0.027083 | 0.021879 | 0. | ↰ |
| 038934     | 0.043564 | 0.014005 | 0.030248 | 0.021217 | 0.017731 | 0.025887 | 0.024007 | 0.036568 |          |          |    |   |
| AJ238588.1 | 0.067591 | 0.062147 | 0.063220 | 0.062092 | 0.072771 | 0.060691 | 0.057550 | 0.079625 | 0.082676 | 0.037804 |    | ↰ |
| 0.021399   | 0.051048 | 0.034646 | 0.034024 | 0.036664 | 0.041097 | 0.021600 | 0.038974 | 0.037912 | 0.046854 | 0.051175 | 0. | ↰ |
| 029257     | 0.031768 | 0.032736 | 0.024440 | 0.025502 | 0.044033 | 0.059174 | 0.000000 | 0.009111 | 0.042722 | 0.048381 | 0. |   |
| 039844     | 0.047166 | 0.053112 | 0.041315 | 0.049094 | 0.049775 | 0.040164 | 0.046670 | 0.042563 |          |          |    |   |
| AJ001562.1 | 0.076702 | 0.071258 | 0.072331 | 0.071203 | 0.081882 | 0.069802 | 0.066661 | 0.088736 | 0.091787 | 0.042845 |    | ↰ |
| 0.026440   | 0.056089 | 0.039687 | 0.039065 | 0.041705 | 0.046138 | 0.026641 | 0.044015 | 0.042953 | 0.051895 | 0.056216 | 0. | ↰ |
| 034298     | 0.035676 | 0.035921 | 0.023656 | 0.030544 | 0.034922 | 0.067396 | 0.009111 | 0.000000 | 0.047763 | 0.053422 | 0. | ↰ |
| 044885     | 0.052207 | 0.058153 | 0.046356 | 0.054135 | 0.054816 | 0.045205 | 0.051711 | 0.047604 |          |          |    |   |
| X72204.1_B | 0.036389 | 0.030945 | 0.032018 | 0.030890 | 0.041569 | 0.029489 | 0.026348 | 0.048423 | 0.051474 | 0.014145 |    | ↰ |
| 0.021323   | 0.019481 | 0.017882 | 0.016810 | 0.016667 | 0.013213 | 0.021699 | 0.015377 | 0.014952 | 0.008859 | 0.008453 | 0. | ↰ |
| 023725     | 0.026756 | 0.027724 | 0.037979 | 0.017219 | 0.075235 | 0.027083 | 0.042722 | 0.047763 | 0.000000 | 0.005659 | 0. | ↰ |
| 011851     | 0.018429 | 0.013078 | 0.003165 | 0.006372 | 0.009352 | 0.005503 | 0.003948 | 0.009485 |          |          |    |   |
| NC_005268. | 0.031185 | 0.025741 | 0.026814 | 0.025686 | 0.036365 | 0.024285 | 0.021144 | 0.043219 | 0.046270 | 0.019349 |    | ↰ |
| 0.026982   | 0.020460 | 0.023086 | 0.022014 | 0.021871 | 0.018417 | 0.026903 | 0.015584 | 0.015471 | 0.009838 | 0.007405 | 0. | ↰ |
| 027180     | 0.025336 | 0.026289 | 0.043183 | 0.022878 | 0.080439 | 0.021879 | 0.048381 | 0.053422 | 0.005659 | 0.000000 | 0. | ↰ |
| 017055     | 0.021685 | 0.007874 | 0.008369 | 0.000781 | 0.005055 | 0.008217 | 0.002128 | 0.014689 |          |          |    |   |
| NC_007441. | 0.048240 | 0.042796 | 0.043869 | 0.042741 | 0.053420 | 0.041340 | 0.038199 | 0.060274 | 0.063325 | 0.010285 |    | ↰ |
| 0.019665   | 0.011204 | 0.006031 | 0.005820 | 0.004816 | 0.007074 | 0.020281 | 0.017023 | 0.017772 | 0.010968 | 0.015491 | 0. | ↰ |
| 023492     | 0.026988 | 0.027228 | 0.026128 | 0.021105 | 0.064945 | 0.038934 | 0.039844 | 0.044885 | 0.011851 | 0.017055 | 0. | ↰ |
| 000000     | 0.010152 | 0.024929 | 0.009112 | 0.017717 | 0.021203 | 0.013047 | 0.014926 | 0.002719 |          |          |    |   |
| NC_008830. | 0.052870 | 0.047426 | 0.048499 | 0.047371 | 0.058050 | 0.045970 | 0.042829 | 0.064904 | 0.067955 | 0.020183 |    | ↰ |
| 0.029817   | 0.003882 | 0.012520 | 0.013142 | 0.011944 | 0.014611 | 0.030433 | 0.027175 | 0.027924 | 0.015598 | 0.020121 | 0. | ↰ |
| 033644     | 0.037140 | 0.037380 | 0.033056 | 0.031257 | 0.072267 | 0.043564 | 0.047166 | 0.052207 | 0.018429 | 0.021685 | 0. | ↰ |
| 010152     | 0.000000 | 0.029559 | 0.019264 | 0.022347 | 0.025833 | 0.017677 | 0.019556 | 0.012071 |          |          |    |   |
| NC_001788. | 0.023311 | 0.017867 | 0.018940 | 0.017812 | 0.028491 | 0.016411 | 0.013270 | 0.035345 | 0.038396 | 0.027223 |    | ↰ |
| 0.033988   | 0.026254 | 0.030960 | 0.029888 | 0.029745 | 0.026291 | 0.034777 | 0.023458 | 0.023345 | 0.013961 | 0.010494 | 0. | ↰ |
| 035054     | 0.033210 | 0.033693 | 0.051057 | 0.027609 | 0.088313 | 0.014005 | 0.053112 | 0.058153 | 0.013078 | 0.007874 | 0. | ↰ |
| 024929     | 0.029559 | 0.000000 | 0.016243 | 0.007212 | 0.003726 | 0.012948 | 0.010002 | 0.022563 |          |          |    |   |
| NC_001321. | 0.039554 | 0.034110 | 0.035183 | 0.034055 | 0.044734 | 0.032654 | 0.029513 | 0.051588 | 0.054639 | 0.010980 |    | ↰ |
| 0.019916   | 0.020316 | 0.014717 | 0.013645 | 0.013502 | 0.010048 | 0.019715 | 0.012784 | 0.012359 | 0.009694 | 0.009860 | 0. | ↰ |
| 021132     | 0.024163 | 0.025131 | 0.034814 | 0.015812 | 0.072070 | 0.030248 | 0.041315 | 0.046356 | 0.003165 | 0.008369 | 0. | ↰ |
| 009112     | 0.019264 | 0.016243 | 0.000000 | 0.009031 | 0.012517 | 0.008096 | 0.006240 | 0.007193 |          |          |    |   |
| NC_005270. | 0.030523 | 0.025079 | 0.026152 | 0.025024 | 0.035703 | 0.023623 | 0.020482 | 0.042557 | 0.045608 | 0.020011 |    | ↰ |
| 0.027695   | 0.019679 | 0.023748 | 0.022676 | 0.022533 | 0.019079 | 0.027565 | 0.016246 | 0.016133 | 0.009057 | 0.006624 | 0. | ↰ |
| 027842     | 0.026051 | 0.027019 | 0.043845 | 0.023591 | 0.081101 | 0.021217 | 0.049094 | 0.054135 | 0.006372 | 0.000781 | 0. | ↰ |
| 017717     | 0.022347 | 0.007212 | 0.009031 | 0.000000 | 0.005836 | 0.008930 | 0.002790 | 0.015351 |          |          |    |   |
| NC_001640. | 0.027037 | 0.021593 | 0.022666 | 0.021538 | 0.032217 | 0.020137 | 0.016996 | 0.039071 | 0.042122 | 0.023497 |    | ↰ |
| 0.030262   | 0.025515 | 0.027234 | 0.026162 | 0.026019 | 0.022565 | 0.031051 | 0.019732 | 0.019619 | 0.014893 | 0.012460 | 0. | ↰ |
| 031328     | 0.029484 | 0.029967 | 0.047331 | 0.024272 | 0.084587 | 0.017731 | 0.049775 | 0.054816 | 0.009352 | 0.005055 | 0. | ↰ |
| 021203     | 0.025833 | 0.003726 | 0.012517 | 0.005836 | 0.000000 | 0.009611 | 0.006276 | 0.018837 |          |          |    |   |
| NC_005275. | 0.035193 | 0.029749 | 0.030822 | 0.029694 | 0.040373 | 0.028293 | 0.025152 | 0.047227 | 0.050278 | 0.016484 |    | ↰ |
| 0.022106   | 0.017731 | 0.019078 | 0.018006 | 0.017863 | 0.014409 | 0.022895 | 0.020880 | 0.020455 | 0.007110 | 0.011011 | 0. | ↰ |
| 029228     | 0.032259 | 0.033227 | 0.039175 | 0.014661 | 0.076431 | 0.025887 | 0.040164 | 0.045205 | 0.005503 | 0.008217 | 0. | ↰ |
| 013047     | 0.017677 | 0.012948 | 0.008096 | 0.008930 | 0.009611 | 0.000000 | 0.007092 | 0.010681 |          |          |    |   |
| NC_006931. | 0.033313 | 0.027869 | 0.028942 | 0.027814 | 0.038493 | 0.026413 | 0.023272 | 0.045347 | 0.048398 | 0.017220 |    | ↰ |
| 0.025271   | 0.020197 | 0.020957 | 0.019885 | 0.019742 | 0.016288 | 0.025070 | 0.013788 | 0.013363 | 0.009575 | 0.007142 | 0. | ↰ |
| 025051     | 0.025167 | 0.026135 | 0.041054 | 0.021167 | 0.078310 | 0.024007 | 0.046670 | 0.051711 | 0.003948 | 0.002128 | 0. | ↰ |
| 014926     | 0.019556 | 0.010002 | 0.006240 | 0.002790 | 0.006276 | 0.007092 | 0.000000 | 0.012560 |          |          |    |   |

NC\_010640. 0.045874 0.040430 0.041503 0.040375 0.051054 0.038974 0.035833 0.057908 0.060959 0.008112 7  
0.021164 0.013123 0.008397 0.008539 0.007182 0.004802 0.020963 0.015104 0.015853 0.008602 0.013125 0. 7  
021573 0.025069 0.025309 0.028494 0.019186 0.067664 0.036568 0.042563 0.047604 0.009485 0.014689 0. 7  
002719 0.012071 0.022563 0.007193 0.015351 0.018837 0.010681 0.012560 0.000000

59 ebolavirus complete genomes

59

FJ217161.1 0.000000 0.001623 0.001781 0.001675 0.001623 0.005529 0.020316 0.020515 0.020793 0.020862 7  
0.020272 0.020272 0.014579 0.014897 0.014685 0.012620 0.013255 0.012128 0.012128 0.012128 0.012075 0. 7  
013891 0.015366 0.015472 0.015366 0.014575 0.014564 0.013995 0.014650 0.014733 0.014680 0.015830 0. 7  
015988 0.015988 0.016094 0.015935 0.015988 0.015619 0.014564 0.014631 0.014657 0.014560 0.014487 0. 7  
014548 0.014646 0.014551 0.014518 0.014530 0.014620 0.014434 0.014575 0.014508 0.014453 0.014405 0. 7  
014611 0.014578 0.014575 0.014575 0.014628  
KC545393.1 0.001623 0.000000 0.000159 0.000053 0.000053 0.006388 0.018693 0.018892 0.019170 0.019239 7  
0.018649 0.018649 0.012956 0.013274 0.013062 0.010997 0.011632 0.010505 0.010505 0.010505 0.010452 0. 7  
012268 0.013743 0.013849 0.013743 0.012952 0.012941 0.012372 0.013027 0.013110 0.013057 0.014207 0. 7  
014365 0.014365 0.014471 0.014312 0.014365 0.013996 0.012941 0.013008 0.013034 0.012937 0.012864 0. 7  
012925 0.013023 0.012928 0.012895 0.012907 0.012997 0.012811 0.012952 0.012885 0.012830 0.012782 0. 7  
012988 0.012955 0.012952 0.012952 0.013005  
KC545395.1 0.001781 0.000159 0.000000 0.000159 0.000159 0.006547 0.018535 0.018734 0.019012 0.019081 7  
0.018491 0.018491 0.012798 0.013116 0.012904 0.010839 0.011474 0.010347 0.010347 0.010347 0.010294 0. 7  
012110 0.013585 0.013691 0.013585 0.012794 0.012783 0.012214 0.012869 0.012952 0.012899 0.014049 0. 7  
014207 0.014207 0.014313 0.014154 0.014207 0.013838 0.012783 0.012850 0.012876 0.012779 0.012706 0. 7  
012767 0.012865 0.012770 0.012737 0.012749 0.012839 0.012653 0.012794 0.012727 0.012672 0.012624 0. 7  
012830 0.012797 0.012794 0.012794 0.012847  
KC545394.1 0.001675 0.000053 0.000159 0.000000 0.000106 0.006388 0.018640 0.018839 0.019117 0.019186 7  
0.018596 0.018596 0.012904 0.013222 0.013010 0.010944 0.011579 0.010452 0.010452 0.010452 0.010399 0. 7  
012215 0.013690 0.013796 0.013690 0.012899 0.012888 0.012319 0.012974 0.013057 0.013005 0.014154 0. 7  
014312 0.014312 0.014418 0.014259 0.014312 0.013943 0.012888 0.012955 0.012981 0.012884 0.012811 0. 7  
012872 0.012970 0.012875 0.012842 0.012854 0.012944 0.012758 0.012899 0.012832 0.012777 0.012729 0. 7  
012935 0.012902 0.012899 0.012899 0.012952  
KC545396.1 0.001623 0.000053 0.000159 0.000106 0.000000 0.006388 0.018693 0.018892 0.019170 0.019239 7  
0.018649 0.018649 0.012956 0.013274 0.013062 0.010997 0.011632 0.010505 0.010505 0.010505 0.010452 0. 7  
012268 0.013743 0.013849 0.013743 0.012952 0.012941 0.012372 0.013027 0.013110 0.013057 0.014207 0. 7  
014365 0.014365 0.014471 0.014312 0.014365 0.013996 0.012941 0.013008 0.013034 0.012937 0.012864 0. 7  
012925 0.013023 0.012928 0.012895 0.012907 0.012997 0.012811 0.012952 0.012885 0.012830 0.012782 0. 7  
012988 0.012955 0.012952 0.012952 0.013005  
FJ217162.1 0.005529 0.006388 0.006547 0.006388 0.006388 0.000000 0.022859 0.023058 0.023336 0.023405 7  
0.022815 0.022815 0.017122 0.017440 0.017228 0.015163 0.015798 0.014671 0.014671 0.014671 0.014618 0. 7  
016434 0.017909 0.018015 0.017909 0.017118 0.017107 0.016538 0.017193 0.017276 0.017223 0.018373 0. 7  
018531 0.018531 0.018637 0.018478 0.018531 0.018162 0.017107 0.017174 0.017200 0.017103 0.017030 0. 7  
017091 0.017189 0.017094 0.017061 0.017073 0.017163 0.016977 0.017118 0.017051 0.016996 0.016948 0. 7  
017154 0.017121 0.017118 0.017118 0.017171  
AF522874.1 0.020316 0.018693 0.018535 0.018640 0.018693 0.022859 0.000000 0.000798 0.000477 0.001002 7  
0.001154 0.001524 0.005736 0.005418 0.005630 0.007696 0.007060 0.008188 0.008188 0.008188 0.008241 0. 7  
006424 0.009970 0.009865 0.009970 0.010234 0.010325 0.010709 0.009999 0.010076 0.010076 0.009428 0. 7  
009323 0.009323 0.009217 0.009376 0.009270 0.009692 0.010325 0.010369 0.010416 0.010413 0.010451 0. 7  
010398 0.010400 0.010413 0.010426 0.010441 0.010355 0.010504 0.010498 0.010465 0.010464 0.010588 0. 7  
010410 0.010422 0.010498 0.010498 0.010498  
AB050936.1 0.020515 0.018892 0.018734 0.018839 0.018892 0.023058 0.000798 0.000000 0.000405 0.000347 7  
0.000700 0.000859 0.005935 0.005617 0.005829 0.007895 0.007259 0.008387 0.008387 0.008387 0.008440 0. 7  
006623 0.009882 0.009777 0.009882 0.010146 0.010237 0.010621 0.009911 0.009988 0.009988 0.009340 0. 7  
009235 0.009235 0.009129 0.009288 0.009182 0.009604 0.010237 0.010281 0.010328 0.010325 0.010363 0. 7  
010310 0.010312 0.010325 0.010338 0.010353 0.010267 0.010416 0.010410 0.010377 0.010376 0.010500 0. 7  
010322 0.010334 0.010410 0.010410 0.010410  
JX477166.1 0.020793 0.019170 0.019012 0.019117 0.019170 0.023336 0.000477 0.000405 0.000000 0.000525 7  
0.000894 0.001053 0.006213 0.005895 0.006107 0.008173 0.007537 0.008665 0.008665 0.008665 0.008718 0. 7  
006901 0.010076 0.009971 0.010076 0.010340 0.010431 0.010815 0.010105 0.010182 0.010182 0.009534 0. 7  
009429 0.009429 0.009323 0.009482 0.009376 0.009798 0.010431 0.010475 0.010522 0.010519 0.010557 0. 7  
010504 0.010506 0.010519 0.010532 0.010547 0.010461 0.010610 0.010604 0.010571 0.010570 0.010694 0. 7

010516 0.010528 0.010604 0.010604 0.010604  
FJ621585.1 0.020862 0.019239 0.019081 0.019186 0.019239 0.023405 0.001002 0.000347 0.000525 0.000000 0.000713 0.000872 0.006282 0.005964 0.006176 0.008242 0.007606 0.008734 0.008734 0.008734 0.008787 0.006970 0.009895 0.009790 0.009895 0.010159 0.010250 0.010634 0.009924 0.010001 0.010001 0.009353 0.009248 0.009248 0.009142 0.009301 0.009195 0.009617 0.010250 0.010294 0.010341 0.010338 0.010376 0.010323 0.010325 0.010338 0.010351 0.010366 0.010280 0.010429 0.010423 0.010390 0.010389 0.010513 0.010335 0.010347 0.010423 0.010423 0.010423  
FJ621583.1 0.020272 0.018649 0.018491 0.018596 0.018649 0.022815 0.001154 0.000700 0.000894 0.000713 0.000000 0.000370 0.005692 0.005374 0.005586 0.007652 0.007016 0.008144 0.008144 0.008144 0.008197 0.006380 0.009182 0.009077 0.009182 0.009446 0.009537 0.009921 0.009211 0.009288 0.009288 0.008640 0.008535 0.008535 0.008429 0.008588 0.008482 0.008904 0.009537 0.009581 0.009628 0.009625 0.009663 0.009610 0.009612 0.009625 0.009638 0.009653 0.009567 0.009716 0.009710 0.009677 0.009676 0.009800 0.009622 0.009634 0.009710 0.009710 0.009710  
JX477165.1 0.020272 0.018649 0.018491 0.018596 0.018649 0.022815 0.001524 0.000859 0.001053 0.000872 0.000370 0.000000 0.005692 0.005374 0.005586 0.007652 0.007016 0.008144 0.008144 0.008144 0.008197 0.006380 0.009023 0.008918 0.009023 0.009287 0.009378 0.009762 0.009052 0.009129 0.009129 0.008481 0.008376 0.008376 0.008270 0.008429 0.008323 0.008745 0.009378 0.009422 0.009469 0.009466 0.009504 0.009451 0.009453 0.009466 0.009479 0.009494 0.009408 0.009557 0.009551 0.009518 0.009517 0.009641 0.009463 0.009475 0.009551 0.009551 0.009551  
FJ968794.1 0.014579 0.012956 0.012798 0.012904 0.012956 0.017122 0.005736 0.005935 0.006213 0.006282 0.005692 0.005692 0.000000 0.000318 0.000477 0.001959 0.001430 0.002451 0.002451 0.002451 0.002504 0.001165 0.006842 0.006842 0.006842 0.006103 0.005909 0.005699 0.006439 0.006525 0.006472 0.006859 0.006964 0.006911 0.006911 0.006806 0.006806 0.006964 0.005856 0.006363 0.006351 0.006468 0.006422 0.006382 0.006465 0.006458 0.006454 0.006487 0.006380 0.006475 0.006525 0.006468 0.006368 0.006440 0.006519 0.006469 0.006420 0.006472 0.006525  
KC242783.2 0.014897 0.013274 0.013116 0.013222 0.013274 0.017440 0.005418 0.005617 0.005895 0.005964 0.005374 0.005374 0.000318 0.000000 0.000371 0.002277 0.001642 0.002769 0.002769 0.002769 0.002822 0.001006 0.006524 0.006524 0.006524 0.005785 0.005633 0.006017 0.006121 0.006207 0.006154 0.006541 0.006646 0.006593 0.006593 0.006488 0.006488 0.006646 0.005633 0.006045 0.006033 0.006150 0.006104 0.006064 0.006147 0.006140 0.006136 0.006169 0.006062 0.006157 0.006207 0.006150 0.006050 0.006122 0.006201 0.006151 0.006102 0.006154 0.006207  
EU338380.1 0.014685 0.013062 0.012904 0.013010 0.013062 0.017228 0.005630 0.005829 0.006107 0.006176 0.005586 0.005586 0.000477 0.000371 0.000000 0.002065 0.001430 0.002557 0.002557 0.002557 0.002610 0.000847 0.006365 0.006365 0.006365 0.005626 0.005432 0.005646 0.005962 0.006048 0.005995 0.006382 0.006487 0.006434 0.006434 0.006329 0.006329 0.006487 0.005379 0.005886 0.005874 0.005991 0.005945 0.005905 0.005988 0.005981 0.005977 0.006010 0.005903 0.005998 0.006048 0.005991 0.005891 0.005963 0.006042 0.005992 0.005943 0.005995 0.006048  
AY729654.1 0.012620 0.010997 0.010839 0.010944 0.010997 0.015163 0.007696 0.007895 0.008173 0.008242 0.007652 0.007652 0.001959 0.002277 0.002065 0.000000 0.000635 0.000673 0.000673 0.000673 0.000726 0.001271 0.006047 0.006047 0.006047 0.005308 0.005114 0.004886 0.005644 0.005730 0.005677 0.006064 0.006169 0.006116 0.006116 0.006011 0.006011 0.006169 0.005061 0.005568 0.005556 0.005673 0.005627 0.005587 0.005670 0.005663 0.005659 0.005692 0.005585 0.005680 0.005730 0.005673 0.005573 0.005645 0.005724 0.005674 0.005625 0.005677 0.005730  
JN638998.1 0.013255 0.011632 0.011474 0.011579 0.011632 0.015798 0.007060 0.007259 0.007537 0.007606 0.007016 0.007016 0.001430 0.001642 0.001430 0.000635 0.000000 0.001127 0.001127 0.001127 0.001180 0.000900 0.005464 0.005464 0.005464 0.004725 0.004531 0.004428 0.005061 0.005147 0.005094 0.005481 0.005586 0.005533 0.005533 0.005428 0.005428 0.005586 0.004478 0.004985 0.004973 0.005090 0.005044 0.005004 0.005087 0.005080 0.005076 0.005109 0.005002 0.005097 0.005147 0.005090 0.004990 0.005062 0.005141 0.005091 0.005042 0.005095 0.005147  
KC545389.1 0.012128 0.010505 0.010347 0.010452 0.010505 0.014671 0.008188 0.008387 0.008665 0.008734 0.008144 0.008144 0.002451 0.002769 0.002557 0.000673 0.001127 0.000000 0.000053 0.000000 0.000053 0.000000 0.001785 0.005816 0.005816 0.005816 0.005077 0.004883 0.004655 0.005413 0.005499 0.005446 0.005833 0.005938 0.005885 0.005885 0.005780 0.005780 0.005938 0.004830 0.005337 0.005325 0.005442 0.005396 0.005356 0.005439 0.005432 0.005428 0.005461 0.005354 0.005449 0.005499 0.005442 0.005342 0.005414 0.005493 0.005443 0.005394 0.005446 0.005499  
KC545390.1 0.012128 0.010505 0.010347 0.010452 0.010505 0.014671 0.008188 0.008387 0.008665 0.008734 0.008144 0.008144 0.002451 0.002769 0.002557 0.000673 0.001127 0.000053 0.000000 0.000053 0.000106 0.001785 0.005763 0.005763 0.005763 0.005024 0.004830 0.004602 0.005360 0.005446 0.005393 0.005780 0.005885 0.005832 0.005832 0.005727 0.005727 0.005885 0.004777 0.005284 0.005272 0.005389 0.005343 0.005303 0.005386 0.005379 0.005375 0.005408 0.005301 0.005396 0.005446 0.005389 0.005289 0.005361 0.005440 0.005390 0.005341 0.005393 0.005446  
KC545391.1 0.012128 0.010505 0.010347 0.010452 0.010505 0.014671 0.008188 0.008387 0.008665 0.008734



|            |          |          |          |          |          |          |          |          |          |          |    |   |
|------------|----------|----------|----------|----------|----------|----------|----------|----------|----------|----------|----|---|
| 0.008144   | 0.008144 | 0.002451 | 0.002769 | 0.002557 | 0.000673 | 0.001127 | 0.000000 | 0.000053 | 0.000000 | 0.000053 | 0. | ↻ |
| 001785     | 0.005816 | 0.005816 | 0.005816 | 0.005077 | 0.004883 | 0.004655 | 0.005413 | 0.005499 | 0.005446 | 0.005833 | 0. | ↻ |
| 005938     | 0.005885 | 0.005885 | 0.005780 | 0.005780 | 0.005938 | 0.004830 | 0.005337 | 0.005325 | 0.005442 | 0.005396 | 0. | ↻ |
| 005356     | 0.005439 | 0.005432 | 0.005428 | 0.005461 | 0.005354 | 0.005449 | 0.005499 | 0.005442 | 0.005342 | 0.005414 | 0. | ↻ |
| 005493     | 0.005443 | 0.005394 | 0.005447 | 0.005499 |          |          |          |          |          |          |    |   |
| KC545392.1 | 0.012075 | 0.010452 | 0.010294 | 0.010399 | 0.010452 | 0.014618 | 0.008241 | 0.008440 | 0.008718 | 0.008787 | ↻  |   |
| 0.008197   | 0.008197 | 0.002504 | 0.002822 | 0.002610 | 0.000726 | 0.001180 | 0.000053 | 0.000106 | 0.000053 | 0.000000 | 0. | ↻ |
| 001838     | 0.005869 | 0.005869 | 0.005869 | 0.005130 | 0.004936 | 0.004708 | 0.005466 | 0.005552 | 0.005499 | 0.005886 | 0. | ↻ |
| 005991     | 0.005938 | 0.005938 | 0.005833 | 0.005833 | 0.005991 | 0.004883 | 0.005390 | 0.005378 | 0.005495 | 0.005449 | 0. | ↻ |
| 005409     | 0.005492 | 0.005485 | 0.005481 | 0.005514 | 0.005407 | 0.005502 | 0.005552 | 0.005495 | 0.005395 | 0.005467 | 0. | ↻ |
| 005546     | 0.005496 | 0.005447 | 0.005499 | 0.005552 |          |          |          |          |          |          |    |   |
| KC589025.1 | 0.013891 | 0.012268 | 0.012110 | 0.012215 | 0.012268 | 0.016434 | 0.006424 | 0.006623 | 0.006901 | 0.006970 | ↻  |   |
| 0.006380   | 0.006380 | 0.001165 | 0.001006 | 0.000847 | 0.001271 | 0.000900 | 0.001785 | 0.001785 | 0.001785 | 0.001838 | 0. | ↻ |
| 000000     | 0.005994 | 0.005994 | 0.005994 | 0.005255 | 0.005061 | 0.005328 | 0.005591 | 0.005677 | 0.005624 | 0.006011 | 0. | ↻ |
| 006116     | 0.006063 | 0.006063 | 0.005958 | 0.005958 | 0.006116 | 0.005008 | 0.005515 | 0.005503 | 0.005620 | 0.005574 | 0. | ↻ |
| 005534     | 0.005617 | 0.005610 | 0.005606 | 0.005639 | 0.005532 | 0.005627 | 0.005677 | 0.005620 | 0.005520 | 0.005592 | 0. | ↻ |
| 005671     | 0.005621 | 0.005572 | 0.005625 | 0.005677 |          |          |          |          |          |          |    |   |
| KC242801.1 | 0.015366 | 0.013743 | 0.013585 | 0.013690 | 0.013743 | 0.017909 | 0.009970 | 0.009882 | 0.010076 | 0.009895 | ↻  |   |
| 0.009182   | 0.009023 | 0.006842 | 0.006524 | 0.006365 | 0.006047 | 0.005464 | 0.005816 | 0.005763 | 0.005816 | 0.005869 | 0. | ↻ |
| 005994     | 0.000000 | 0.000106 | 0.000000 | 0.000791 | 0.000933 | 0.001371 | 0.000716 | 0.000633 | 0.000685 | 0.000541 | 0. | ↻ |
| 000647     | 0.000647 | 0.000752 | 0.000594 | 0.000700 | 0.000278 | 0.000986 | 0.000735 | 0.000709 | 0.000806 | 0.000879 | 0. | ↻ |
| 000818     | 0.000720 | 0.000815 | 0.000848 | 0.000836 | 0.000746 | 0.000932 | 0.000791 | 0.000858 | 0.000913 | 0.000961 | 0. | ↻ |
| 000755     | 0.000788 | 0.000791 | 0.000791 | 0.000738 |          |          |          |          |          |          |    |   |
| NC_002549. | 0.015472 | 0.013849 | 0.013691 | 0.013796 | 0.013849 | 0.018015 | 0.009865 | 0.009777 | 0.009971 | 0.009790 | ↻  |   |
| 0.009077   | 0.008918 | 0.006842 | 0.006524 | 0.006365 | 0.006047 | 0.005464 | 0.005816 | 0.005763 | 0.005816 | 0.005869 | 0. | ↻ |
| 005994     | 0.000106 | 0.000000 | 0.000106 | 0.000897 | 0.000933 | 0.001477 | 0.000822 | 0.000739 | 0.000791 | 0.000436 | 0. | ↻ |
| 000542     | 0.000542 | 0.000647 | 0.000489 | 0.000595 | 0.000173 | 0.000986 | 0.000841 | 0.000815 | 0.000912 | 0.000985 | 0. | ↻ |
| 000924     | 0.000826 | 0.000921 | 0.000954 | 0.000942 | 0.000852 | 0.001038 | 0.000897 | 0.000964 | 0.001019 | 0.001067 | 0. | ↻ |
| 000861     | 0.000894 | 0.000897 | 0.000897 | 0.000844 |          |          |          |          |          |          |    |   |
| KC242791.1 | 0.015366 | 0.013743 | 0.013585 | 0.013690 | 0.013743 | 0.017909 | 0.009970 | 0.009882 | 0.010076 | 0.009895 | ↻  |   |
| 0.009182   | 0.009023 | 0.006842 | 0.006524 | 0.006365 | 0.006047 | 0.005464 | 0.005816 | 0.005763 | 0.005816 | 0.005869 | 0. | ↻ |
| 005994     | 0.000000 | 0.000106 | 0.000000 | 0.000791 | 0.000933 | 0.001371 | 0.000716 | 0.000633 | 0.000685 | 0.000541 | 0. | ↻ |
| 000647     | 0.000647 | 0.000752 | 0.000594 | 0.000700 | 0.000278 | 0.000986 | 0.000735 | 0.000709 | 0.000806 | 0.000879 | 0. | ↻ |
| 000818     | 0.000720 | 0.000815 | 0.000848 | 0.000836 | 0.000746 | 0.000932 | 0.000791 | 0.000858 | 0.000913 | 0.000961 | 0. | ↻ |
| 000755     | 0.000788 | 0.000791 | 0.000791 | 0.000738 |          |          |          |          |          |          |    |   |
| KC242792.1 | 0.014575 | 0.012952 | 0.012794 | 0.012899 | 0.012952 | 0.017118 | 0.010234 | 0.010146 | 0.010340 | 0.010159 | ↻  |   |
| 0.009446   | 0.009287 | 0.006103 | 0.005785 | 0.005626 | 0.005308 | 0.004725 | 0.005077 | 0.005024 | 0.005077 | 0.005130 | 0. | ↻ |
| 005255     | 0.000791 | 0.000897 | 0.000791 | 0.000000 | 0.000274 | 0.000580 | 0.000496 | 0.000422 | 0.000422 | 0.001255 | 0. | ↻ |
| 001413     | 0.001413 | 0.001519 | 0.001360 | 0.001413 | 0.001044 | 0.000327 | 0.000260 | 0.000248 | 0.000365 | 0.000319 | 0. | ↻ |
| 000279     | 0.000362 | 0.000355 | 0.000351 | 0.000384 | 0.000277 | 0.000372 | 0.000422 | 0.000365 | 0.000265 | 0.000354 | 0. | ↻ |
| 000416     | 0.000366 | 0.000317 | 0.000369 | 0.000422 |          |          |          |          |          |          |    |   |
| KC242793.1 | 0.014564 | 0.012941 | 0.012783 | 0.012888 | 0.012941 | 0.017107 | 0.010325 | 0.010237 | 0.010431 | 0.010250 | ↻  |   |
| 0.009537   | 0.009378 | 0.005909 | 0.005633 | 0.005432 | 0.005114 | 0.004531 | 0.004883 | 0.004830 | 0.004883 | 0.004936 | 0. | ↻ |
| 005061     | 0.000933 | 0.000933 | 0.000933 | 0.000274 | 0.000000 | 0.000569 | 0.000770 | 0.000696 | 0.000696 | 0.001266 | 0. | ↻ |
| 001424     | 0.001424 | 0.001530 | 0.001371 | 0.001424 | 0.001055 | 0.000053 | 0.000454 | 0.000442 | 0.000559 | 0.000513 | 0. | ↻ |
| 000473     | 0.000556 | 0.000549 | 0.000545 | 0.000578 | 0.000471 | 0.000566 | 0.000616 | 0.000559 | 0.000459 | 0.000531 | 0. | ↻ |
| 000610     | 0.000560 | 0.000511 | 0.000563 | 0.000616 |          |          |          |          |          |          |    |   |
| KC242794.1 | 0.013995 | 0.012372 | 0.012214 | 0.012319 | 0.012372 | 0.016538 | 0.010709 | 0.010621 | 0.010815 | 0.010634 | ↻  |   |
| 0.009921   | 0.009762 | 0.005699 | 0.006017 | 0.005646 | 0.004886 | 0.004428 | 0.004655 | 0.004602 | 0.004655 | 0.004708 | 0. | ↻ |
| 005328     | 0.001371 | 0.001477 | 0.001371 | 0.000580 | 0.000569 | 0.000000 | 0.000812 | 0.000844 | 0.000791 | 0.001835 | 0. | ↻ |
| 001993     | 0.001993 | 0.002099 | 0.001940 | 0.001993 | 0.001624 | 0.000569 | 0.000682 | 0.000670 | 0.000787 | 0.000741 | 0. | ↻ |
| 000701     | 0.000784 | 0.000777 | 0.000773 | 0.000806 | 0.000699 | 0.000794 | 0.000844 | 0.000787 | 0.000687 | 0.000759 | 0. | ↻ |
| 000838     | 0.000788 | 0.000739 | 0.000791 | 0.000844 |          |          |          |          |          |          |    |   |
| AY354458.1 | 0.014650 | 0.013027 | 0.012869 | 0.012974 | 0.013027 | 0.017193 | 0.009999 | 0.009911 | 0.010105 | 0.009924 | ↻  |   |
| 0.009211   | 0.009052 | 0.006439 | 0.006121 | 0.005962 | 0.005644 | 0.005061 | 0.005413 | 0.005360 | 0.005413 | 0.005466 | 0. | ↻ |
| 005591     | 0.000716 | 0.000822 | 0.000716 | 0.000496 | 0.000770 | 0.000812 | 0.000000 | 0.000086 | 0.000077 | 0.001180 | 0. | ↻ |
| 001338     | 0.001338 | 0.001444 | 0.001285 | 0.001338 | 0.000969 | 0.000823 | 0.000427 | 0.000512 | 0.000414 | 0.000452 | 0. | ↻ |
| 000399     | 0.000401 | 0.000414 | 0.000427 | 0.000442 | 0.000385 | 0.000505 | 0.000499 | 0.000466 | 0.000465 | 0.000589 | 0. | ↻ |
| 000411     | 0.000423 | 0.000499 | 0.000499 | 0.000499 |          |          |          |          |          |          |    |   |
| KC242796.1 | 0.014733 | 0.013110 | 0.012952 | 0.013057 | 0.013110 | 0.017276 | 0.010076 | 0.009988 | 0.010182 | 0.010001 | ↻  |   |
| 0.009288   | 0.009129 | 0.006525 | 0.006207 | 0.006048 | 0.005730 | 0.005147 | 0.005499 | 0.005446 | 0.005499 | 0.005552 | 0. | ↻ |
| 005677     | 0.000633 | 0.000739 | 0.000633 | 0.000422 | 0.000696 | 0.000844 | 0.000086 | 0.000000 | 0.000053 | 0.001097 | 0. | ↻ |

|            |          |          |          |          |          |          |          |          |          |          |    |   |
|------------|----------|----------|----------|----------|----------|----------|----------|----------|----------|----------|----|---|
| 001255     | 0.001255 | 0.001361 | 0.001202 | 0.001255 | 0.000886 | 0.000749 | 0.000353 | 0.000438 | 0.000337 | 0.000375 | 0. | ↻ |
| 000322     | 0.000324 | 0.000337 | 0.000350 | 0.000365 | 0.000311 | 0.000428 | 0.000422 | 0.000389 | 0.000388 | 0.000512 | 0. | ↻ |
| 000334     | 0.000346 | 0.000422 | 0.000422 | 0.000422 |          |          |          |          |          |          |    |   |
| KC242799.1 | 0.014680 | 0.013057 | 0.012899 | 0.013005 | 0.013057 | 0.017223 | 0.010076 | 0.009988 | 0.010182 | 0.010001 |    | ↻ |
| 0.009288   | 0.009129 | 0.006472 | 0.006154 | 0.005995 | 0.005677 | 0.005094 | 0.005446 | 0.005393 | 0.005446 | 0.005499 | 0. | ↻ |
| 005624     | 0.000685 | 0.000791 | 0.000685 | 0.000422 | 0.000696 | 0.000791 | 0.000077 | 0.000053 | 0.000000 | 0.001149 | 0. | ↻ |
| 001307     | 0.001307 | 0.001413 | 0.001254 | 0.001307 | 0.000938 | 0.000749 | 0.000353 | 0.000438 | 0.000337 | 0.000375 | 0. | ↻ |
| 000322     | 0.000324 | 0.000337 | 0.000350 | 0.000365 | 0.000311 | 0.000428 | 0.000422 | 0.000389 | 0.000388 | 0.000512 | 0. | ↻ |
| 000334     | 0.000346 | 0.000422 | 0.000422 | 0.000422 |          |          |          |          |          |          |    |   |
| KC242784.1 | 0.015830 | 0.014207 | 0.014049 | 0.014154 | 0.014207 | 0.018373 | 0.009428 | 0.009340 | 0.009534 | 0.009353 |    | ↻ |
| 0.008640   | 0.008481 | 0.006859 | 0.006541 | 0.006382 | 0.006064 | 0.005481 | 0.005833 | 0.005780 | 0.005833 | 0.005886 | 0. | ↻ |
| 006011     | 0.000541 | 0.000436 | 0.000541 | 0.001255 | 0.001266 | 0.001835 | 0.001180 | 0.001097 | 0.001149 | 0.000000 | 0. | ↻ |
| 000158     | 0.000158 | 0.000264 | 0.000105 | 0.000158 | 0.000263 | 0.001266 | 0.001199 | 0.001173 | 0.001270 | 0.001343 | 0. | ↻ |
| 001282     | 0.001184 | 0.001279 | 0.001312 | 0.001300 | 0.001210 | 0.001396 | 0.001255 | 0.001322 | 0.001377 | 0.001425 | 0. | ↻ |
| 001219     | 0.001252 | 0.001255 | 0.001255 | 0.001202 |          |          |          |          |          |          |    |   |
| KC242786.1 | 0.015988 | 0.014365 | 0.014207 | 0.014312 | 0.014365 | 0.018531 | 0.009323 | 0.009235 | 0.009429 | 0.009248 |    | ↻ |
| 0.008535   | 0.008376 | 0.006964 | 0.006646 | 0.006487 | 0.006169 | 0.005586 | 0.005938 | 0.005885 | 0.005938 | 0.005991 | 0. | ↻ |
| 006116     | 0.000647 | 0.000542 | 0.000647 | 0.001413 | 0.001424 | 0.001993 | 0.001338 | 0.001255 | 0.001307 | 0.000158 | 0. | ↻ |
| 000000     | 0.000053 | 0.000106 | 0.000158 | 0.000158 | 0.000369 | 0.001424 | 0.001357 | 0.001331 | 0.001428 | 0.001501 | 0. | ↻ |
| 001440     | 0.001342 | 0.001437 | 0.001470 | 0.001458 | 0.001368 | 0.001554 | 0.001413 | 0.001480 | 0.001535 | 0.001583 | 0. | ↻ |
| 001377     | 0.001410 | 0.001413 | 0.001413 | 0.001360 |          |          |          |          |          |          |    |   |
| KC242787.1 | 0.015988 | 0.014365 | 0.014207 | 0.014312 | 0.014365 | 0.018531 | 0.009323 | 0.009235 | 0.009429 | 0.009248 |    | ↻ |
| 0.008535   | 0.008376 | 0.006911 | 0.006593 | 0.006434 | 0.006116 | 0.005533 | 0.005885 | 0.005832 | 0.005885 | 0.005938 | 0. | ↻ |
| 006063     | 0.000647 | 0.000542 | 0.000647 | 0.001413 | 0.001424 | 0.001993 | 0.001338 | 0.001255 | 0.001307 | 0.000158 | 0. | ↻ |
| 000053     | 0.000000 | 0.000106 | 0.000105 | 0.000105 | 0.000369 | 0.001424 | 0.001357 | 0.001331 | 0.001428 | 0.001501 | 0. | ↻ |
| 001440     | 0.001342 | 0.001437 | 0.001470 | 0.001458 | 0.001368 | 0.001554 | 0.001413 | 0.001480 | 0.001535 | 0.001583 | 0. | ↻ |
| 001377     | 0.001410 | 0.001413 | 0.001413 | 0.001360 |          |          |          |          |          |          |    |   |
| KC242789.1 | 0.016094 | 0.014471 | 0.014313 | 0.014418 | 0.014471 | 0.018637 | 0.009217 | 0.009129 | 0.009323 | 0.009142 |    | ↻ |
| 0.008429   | 0.008270 | 0.006911 | 0.006593 | 0.006434 | 0.006116 | 0.005533 | 0.005885 | 0.005832 | 0.005885 | 0.005938 | 0. | ↻ |
| 006063     | 0.000752 | 0.000647 | 0.000752 | 0.001519 | 0.001530 | 0.002099 | 0.001444 | 0.001361 | 0.001413 | 0.000264 | 0. | ↻ |
| 000106     | 0.000106 | 0.000000 | 0.000159 | 0.000106 | 0.000475 | 0.001530 | 0.001463 | 0.001437 | 0.001534 | 0.001607 | 0. | ↻ |
| 001546     | 0.001448 | 0.001543 | 0.001576 | 0.001564 | 0.001474 | 0.001660 | 0.001519 | 0.001586 | 0.001641 | 0.001689 | 0. | ↻ |
| 001483     | 0.001516 | 0.001519 | 0.001519 | 0.001466 |          |          |          |          |          |          |    |   |
| KC242785.1 | 0.015935 | 0.014312 | 0.014154 | 0.014259 | 0.014312 | 0.018478 | 0.009376 | 0.009288 | 0.009482 | 0.009301 |    | ↻ |
| 0.008588   | 0.008429 | 0.006806 | 0.006488 | 0.006329 | 0.006011 | 0.005428 | 0.005780 | 0.005727 | 0.005780 | 0.005833 | 0. | ↻ |
| 005958     | 0.000594 | 0.000489 | 0.000594 | 0.001360 | 0.001371 | 0.001940 | 0.001285 | 0.001202 | 0.001254 | 0.000105 | 0. | ↻ |
| 000158     | 0.000105 | 0.000159 | 0.000000 | 0.000106 | 0.000316 | 0.001371 | 0.001304 | 0.001278 | 0.001375 | 0.001448 | 0. | ↻ |
| 001387     | 0.001289 | 0.001384 | 0.001417 | 0.001405 | 0.001315 | 0.001501 | 0.001360 | 0.001427 | 0.001482 | 0.001530 | 0. | ↻ |
| 001324     | 0.001357 | 0.001360 | 0.001360 | 0.001307 |          |          |          |          |          |          |    |   |
| KC242790.1 | 0.015988 | 0.014365 | 0.014207 | 0.014312 | 0.014365 | 0.018531 | 0.009270 | 0.009182 | 0.009376 | 0.009195 |    | ↻ |
| 0.008482   | 0.008323 | 0.006806 | 0.006488 | 0.006329 | 0.006011 | 0.005428 | 0.005780 | 0.005727 | 0.005780 | 0.005833 | 0. | ↻ |
| 005958     | 0.000700 | 0.000595 | 0.000700 | 0.001413 | 0.001424 | 0.001993 | 0.001338 | 0.001255 | 0.001307 | 0.000158 | 0. | ↻ |
| 000158     | 0.000105 | 0.000106 | 0.000106 | 0.000000 | 0.000422 | 0.001424 | 0.001357 | 0.001331 | 0.001428 | 0.001501 | 0. | ↻ |
| 001440     | 0.001342 | 0.001437 | 0.001470 | 0.001458 | 0.001368 | 0.001554 | 0.001413 | 0.001480 | 0.001535 | 0.001583 | 0. | ↻ |
| 001377     | 0.001410 | 0.001413 | 0.001413 | 0.001360 |          |          |          |          |          |          |    |   |
| KC242788.1 | 0.015619 | 0.013996 | 0.013838 | 0.013943 | 0.013996 | 0.018162 | 0.009692 | 0.009604 | 0.009798 | 0.009617 |    | ↻ |
| 0.008904   | 0.008745 | 0.006964 | 0.006646 | 0.006487 | 0.006169 | 0.005586 | 0.005938 | 0.005885 | 0.005938 | 0.005991 | 0. | ↻ |
| 006116     | 0.000278 | 0.000173 | 0.000278 | 0.001044 | 0.001055 | 0.001624 | 0.000969 | 0.000886 | 0.000938 | 0.000263 | 0. | ↻ |
| 000369     | 0.000369 | 0.000475 | 0.000316 | 0.000422 | 0.000000 | 0.001108 | 0.000988 | 0.000962 | 0.001059 | 0.001132 | 0. | ↻ |
| 001071     | 0.000973 | 0.001068 | 0.001101 | 0.001089 | 0.000999 | 0.001185 | 0.001044 | 0.001111 | 0.001166 | 0.001214 | 0. | ↻ |
| 001008     | 0.001041 | 0.001044 | 0.001044 | 0.000991 |          |          |          |          |          |          |    |   |
| KC242800.1 | 0.014564 | 0.012941 | 0.012783 | 0.012888 | 0.012941 | 0.017107 | 0.010325 | 0.010237 | 0.010431 | 0.010250 |    | ↻ |
| 0.009537   | 0.009378 | 0.005856 | 0.005633 | 0.005379 | 0.005061 | 0.004478 | 0.004830 | 0.004777 | 0.004830 | 0.004883 | 0. | ↻ |
| 005008     | 0.000986 | 0.000986 | 0.000986 | 0.000327 | 0.000053 | 0.000569 | 0.000823 | 0.000749 | 0.000749 | 0.001266 | 0. | ↻ |
| 001424     | 0.001424 | 0.001530 | 0.001371 | 0.001424 | 0.001108 | 0.000000 | 0.000507 | 0.000495 | 0.000612 | 0.000566 | 0. | ↻ |
| 000526     | 0.000609 | 0.000602 | 0.000598 | 0.000631 | 0.000524 | 0.000619 | 0.000669 | 0.000612 | 0.000512 | 0.000584 | 0. | ↻ |
| 000663     | 0.000613 | 0.000564 | 0.000616 | 0.000669 |          |          |          |          |          |          |    |   |
| KM034555.1 | 0.014631 | 0.013008 | 0.012850 | 0.012955 | 0.013008 | 0.017174 | 0.010369 | 0.010281 | 0.010475 | 0.010294 |    | ↻ |
| 0.009581   | 0.009422 | 0.006363 | 0.006045 | 0.005886 | 0.005568 | 0.004985 | 0.005337 | 0.005284 | 0.005337 | 0.005390 | 0. | ↻ |
| 005515     | 0.000735 | 0.000841 | 0.000735 | 0.000260 | 0.000454 | 0.000682 | 0.000427 | 0.000353 | 0.000353 | 0.001199 | 0. | ↻ |
| 001357     | 0.001357 | 0.001463 | 0.001304 | 0.001357 | 0.000988 | 0.000507 | 0.000000 | 0.000085 | 0.000132 | 0.000144 | 0. | ↻ |
| 000083     | 0.000102 | 0.000132 | 0.000147 | 0.000153 | 0.000042 | 0.000197 | 0.000162 | 0.000132 | 0.000178 | 0.000226 | 0. | ↻ |



|            |          |          |          |          |          |          |          |          |          |          |    |   |
|------------|----------|----------|----------|----------|----------|----------|----------|----------|----------|----------|----|---|
| 0.009710   | 0.009551 | 0.006525 | 0.006207 | 0.006048 | 0.005730 | 0.005147 | 0.005499 | 0.005446 | 0.005499 | 0.005552 | 0. | ↕ |
| 005677     | 0.000791 | 0.000897 | 0.000791 | 0.000422 | 0.000616 | 0.000844 | 0.000499 | 0.000422 | 0.000422 | 0.001255 | 0. | ↕ |
| 001413     | 0.001413 | 0.001519 | 0.001360 | 0.001413 | 0.001044 | 0.000669 | 0.000162 | 0.000174 | 0.000085 | 0.000103 | 0. | ↕ |
| 000143     | 0.000098 | 0.000085 | 0.000072 | 0.000064 | 0.000145 | 0.000141 | 0.000000 | 0.000067 | 0.000157 | 0.000170 | 0. | ↕ |
| 000088     | 0.000076 | 0.000105 | 0.000052 | 0.000053 |          |          |          |          |          |          |    |   |
| KM233099.1 | 0.014508 | 0.012885 | 0.012727 | 0.012832 | 0.012885 | 0.017051 | 0.010465 | 0.010377 | 0.010571 | 0.010390 |    | ↕ |
| 0.009677   | 0.009518 | 0.006468 | 0.006150 | 0.005991 | 0.005673 | 0.005090 | 0.005442 | 0.005389 | 0.005442 | 0.005495 | 0. | ↕ |
| 005620     | 0.000858 | 0.000964 | 0.000858 | 0.000365 | 0.000559 | 0.000787 | 0.000466 | 0.000389 | 0.000389 | 0.001322 | 0. | ↕ |
| 001480     | 0.001480 | 0.001586 | 0.001427 | 0.001480 | 0.001111 | 0.000612 | 0.000132 | 0.000217 | 0.000052 | 0.000046 | 0. | ↕ |
| 000086     | 0.000138 | 0.000052 | 0.000039 | 0.000024 | 0.000112 | 0.000074 | 0.000067 | 0.000000 | 0.000100 | 0.000123 | 0. | ↕ |
| 000103     | 0.000070 | 0.000148 | 0.000095 | 0.000120 |          |          |          |          |          |          |    |   |
| KM233097.1 | 0.014453 | 0.012830 | 0.012672 | 0.012777 | 0.012830 | 0.016996 | 0.010464 | 0.010376 | 0.010570 | 0.010389 |    | ↕ |
| 0.009676   | 0.009517 | 0.006368 | 0.006050 | 0.005891 | 0.005573 | 0.004990 | 0.005342 | 0.005289 | 0.005342 | 0.005395 | 0. | ↕ |
| 005520     | 0.000913 | 0.001019 | 0.000913 | 0.000265 | 0.000459 | 0.000687 | 0.000465 | 0.000388 | 0.000388 | 0.001377 | 0. | ↕ |
| 001535     | 0.001535 | 0.001641 | 0.001482 | 0.001535 | 0.001166 | 0.000512 | 0.000178 | 0.000204 | 0.000107 | 0.000054 | 0. | ↕ |
| 000095     | 0.000193 | 0.000098 | 0.000086 | 0.000119 | 0.000167 | 0.000107 | 0.000157 | 0.000100 | 0.000000 | 0.000124 | 0. | ↕ |
| 000158     | 0.000125 | 0.000122 | 0.000122 | 0.000175 |          |          |          |          |          |          |    |   |
| KM233109.1 | 0.014405 | 0.012782 | 0.012624 | 0.012729 | 0.012782 | 0.016948 | 0.010588 | 0.010500 | 0.010694 | 0.010513 |    | ↕ |
| 0.009800   | 0.009641 | 0.006440 | 0.006122 | 0.005963 | 0.005645 | 0.005062 | 0.005414 | 0.005361 | 0.005414 | 0.005467 | 0. | ↕ |
| 005592     | 0.000961 | 0.001067 | 0.000961 | 0.000354 | 0.000531 | 0.000759 | 0.000589 | 0.000512 | 0.000512 | 0.001425 | 0. | ↕ |
| 001583     | 0.001583 | 0.001689 | 0.001530 | 0.001583 | 0.001214 | 0.000584 | 0.000226 | 0.000252 | 0.000175 | 0.000137 | 0. | ↕ |
| 000190     | 0.000241 | 0.000175 | 0.000162 | 0.000147 | 0.000233 | 0.000090 | 0.000170 | 0.000123 | 0.000124 | 0.000000 | 0. | ↕ |
| 000206     | 0.000173 | 0.000170 | 0.000170 | 0.000223 |          |          |          |          |          |          |    |   |
| KM233096.1 | 0.014611 | 0.012988 | 0.012830 | 0.012935 | 0.012988 | 0.017154 | 0.010410 | 0.010322 | 0.010516 | 0.010335 |    | ↕ |
| 0.009622   | 0.009463 | 0.006519 | 0.006201 | 0.006042 | 0.005724 | 0.005141 | 0.005493 | 0.005440 | 0.005493 | 0.005546 | 0. | ↕ |
| 005671     | 0.000755 | 0.000861 | 0.000755 | 0.000416 | 0.000610 | 0.000838 | 0.000411 | 0.000334 | 0.000334 | 0.001219 | 0. | ↕ |
| 001377     | 0.001377 | 0.001483 | 0.001324 | 0.001377 | 0.001008 | 0.000663 | 0.000156 | 0.000220 | 0.000051 | 0.000124 | 0. | ↕ |
| 000137     | 0.000079 | 0.000061 | 0.000093 | 0.000081 | 0.000139 | 0.000177 | 0.000088 | 0.000103 | 0.000158 | 0.000206 | 0. | ↕ |
| 000000     | 0.000050 | 0.000151 | 0.000098 | 0.000098 |          |          |          |          |          |          |    |   |
| KM233103.1 | 0.014578 | 0.012955 | 0.012797 | 0.012902 | 0.012955 | 0.017121 | 0.010422 | 0.010334 | 0.010528 | 0.010347 |    | ↕ |
| 0.009634   | 0.009475 | 0.006469 | 0.006151 | 0.005992 | 0.005674 | 0.005091 | 0.005443 | 0.005390 | 0.005443 | 0.005496 | 0. | ↕ |
| 005621     | 0.000788 | 0.000894 | 0.000788 | 0.000366 | 0.000560 | 0.000788 | 0.000423 | 0.000346 | 0.000346 | 0.001252 | 0. | ↕ |
| 001410     | 0.001410 | 0.001516 | 0.001357 | 0.001410 | 0.001041 | 0.000613 | 0.000106 | 0.000191 | 0.000026 | 0.000091 | 0. | ↕ |
| 000087     | 0.000068 | 0.000027 | 0.000060 | 0.000048 | 0.000089 | 0.000144 | 0.000076 | 0.000070 | 0.000125 | 0.000173 | 0. | ↕ |
| 000050     | 0.000000 | 0.000122 | 0.000076 | 0.000076 |          |          |          |          |          |          |    |   |
| KJ660346.2 | 0.014575 | 0.012952 | 0.012794 | 0.012899 | 0.012952 | 0.017118 | 0.010498 | 0.010410 | 0.010604 | 0.010423 |    | ↕ |
| 0.009710   | 0.009551 | 0.006420 | 0.006102 | 0.005943 | 0.005625 | 0.005042 | 0.005394 | 0.005341 | 0.005394 | 0.005447 | 0. | ↕ |
| 005572     | 0.000791 | 0.000897 | 0.000791 | 0.000317 | 0.000511 | 0.000739 | 0.000499 | 0.000422 | 0.000422 | 0.001255 | 0. | ↕ |
| 001413     | 0.001413 | 0.001519 | 0.001360 | 0.001413 | 0.001044 | 0.000564 | 0.000129 | 0.000082 | 0.000148 | 0.000137 | 0. | ↕ |
| 000100     | 0.000098 | 0.000148 | 0.000163 | 0.000169 | 0.000143 | 0.000190 | 0.000105 | 0.000148 | 0.000122 | 0.000170 | 0. | ↕ |
| 000151     | 0.000122 | 0.000000 | 0.000053 | 0.000105 |          |          |          |          |          |          |    |   |
| KJ660347.2 | 0.014575 | 0.012952 | 0.012794 | 0.012899 | 0.012952 | 0.017118 | 0.010498 | 0.010410 | 0.010604 | 0.010423 |    | ↕ |
| 0.009710   | 0.009551 | 0.006472 | 0.006154 | 0.005995 | 0.005677 | 0.005095 | 0.005446 | 0.005393 | 0.005447 | 0.005499 | 0. | ↕ |
| 005625     | 0.000791 | 0.000897 | 0.000791 | 0.000369 | 0.000563 | 0.000791 | 0.000499 | 0.000422 | 0.000422 | 0.001255 | 0. | ↕ |
| 001413     | 0.001413 | 0.001519 | 0.001360 | 0.001413 | 0.001044 | 0.000616 | 0.000129 | 0.000122 | 0.000095 | 0.000088 | 0. | ↕ |
| 000100     | 0.000098 | 0.000095 | 0.000110 | 0.000116 | 0.000143 | 0.000141 | 0.000052 | 0.000095 | 0.000122 | 0.000170 | 0. | ↕ |
| 000098     | 0.000076 | 0.000053 | 0.000000 | 0.000053 |          |          |          |          |          |          |    |   |
| KJ660348.2 | 0.014628 | 0.013005 | 0.012847 | 0.012952 | 0.013005 | 0.017171 | 0.010498 | 0.010410 | 0.010604 | 0.010423 |    | ↕ |
| 0.009710   | 0.009551 | 0.006525 | 0.006207 | 0.006048 | 0.005730 | 0.005147 | 0.005499 | 0.005446 | 0.005499 | 0.005552 | 0. | ↕ |
| 005677     | 0.000738 | 0.000844 | 0.000738 | 0.000422 | 0.000616 | 0.000844 | 0.000499 | 0.000422 | 0.000422 | 0.001202 | 0. | ↕ |
| 001360     | 0.001360 | 0.001466 | 0.001307 | 0.001360 | 0.000991 | 0.000669 | 0.000162 | 0.000174 | 0.000095 | 0.000141 | 0. | ↕ |
| 000143     | 0.000098 | 0.000095 | 0.000110 | 0.000116 | 0.000145 | 0.000194 | 0.000053 | 0.000120 | 0.000175 | 0.000223 | 0. | ↕ |
| 000098     | 0.000076 | 0.000105 | 0.000053 | 0.000000 |          |          |          |          |          |          |    |   |

30 coronavirus with 4 non-coronavirus whole genomes

34

|             |          |          |          |          |          |          |          |          |          |          |    |   |
|-------------|----------|----------|----------|----------|----------|----------|----------|----------|----------|----------|----|---|
| AF3304460.1 | 0.000000 | 0.025460 | 0.046399 | 0.014989 | 0.014652 | 0.013666 | 0.015049 | 0.013376 | 0.022949 | 0.021213 |    | ↕ |
| 0.022271    | 0.023119 | 0.016951 | 0.016535 | 0.038478 | 0.038155 | 0.038381 | 0.038625 | 0.038524 | 0.038260 | 0.038265 | 0. | ↕ |
| 038260      | 0.038254 | 0.038227 | 0.038179 | 0.038440 | 0.038317 | 0.038613 | 0.038691 | 0.055269 | 0.101034 | 0.133415 | 0. | ↕ |
| 139580      | 0.137598 |          |          |          |          |          |          |          |          |          |    |   |
| AF353511.1  | 0.025460 | 0.000000 | 0.059794 | 0.040450 | 0.040113 | 0.039127 | 0.040510 | 0.038837 | 0.012978 | 0.014599 |    | ↕ |

0.014114 0.012951 0.041116 0.040700 0.037350 0.036966 0.037493 0.037615 0.037615 0.037088 0.036943 0. 7  
037088 0.037053 0.037088 0.037012 0.037608 0.037191 0.036967 0.036978 0.068664 0.087639 0.110493 0. 7  
126185 0.124203  
NC\_005831. 0.046399 0.059794 0.000000 0.036244 0.035910 0.036766 0.036690 0.036928 0.069133 0.066380 7  
0.066494 0.069518 0.060041 0.062850 0.084877 0.084554 0.084780 0.085024 0.084923 0.084659 0.084664 0. 7  
084659 0.084653 0.084626 0.084578 0.084839 0.084716 0.085012 0.085090 0.015150 0.147433 0.170287 0. 7  
185979 0.183997  
AY391777.1 0.014989 0.040450 0.036244 0.000000 0.002454 0.002548 0.001824 0.002516 0.032889 0.030136 7  
0.030250 0.033274 0.023797 0.026606 0.048633 0.048310 0.048536 0.048780 0.048679 0.048415 0.048420 0. 7  
048415 0.048409 0.048382 0.048334 0.048595 0.048472 0.048768 0.048846 0.045114 0.111189 0.148405 0. 7  
149735 0.147753  
U00735.2\_B 0.014652 0.040113 0.035910 0.002454 0.000000 0.000986 0.001136 0.001276 0.033223 0.030470 7  
0.030584 0.033608 0.024131 0.026940 0.048967 0.048644 0.048870 0.049114 0.049013 0.048749 0.048754 0. 7  
048749 0.048743 0.048716 0.048668 0.048929 0.048806 0.049102 0.049180 0.044780 0.111523 0.148068 0. 7  
150069 0.148087  
AF391542.1 0.013666 0.039127 0.036766 0.002548 0.000986 0.000000 0.001383 0.000290 0.032367 0.029614 7  
0.029728 0.032752 0.023275 0.026084 0.048111 0.047788 0.048014 0.048258 0.048157 0.047893 0.047898 0. 7  
047893 0.047887 0.047860 0.047812 0.048073 0.047950 0.048246 0.048324 0.045636 0.110667 0.147082 0. 7  
149213 0.147231  
AF220295.1 0.015049 0.040510 0.036690 0.001824 0.001136 0.001383 0.000000 0.001673 0.032443 0.029690 7  
0.029804 0.032828 0.023351 0.026160 0.048358 0.048340 0.048309 0.048334 0.048233 0.048348 0.048355 0. 7  
048315 0.048328 0.048281 0.048329 0.048181 0.048199 0.048623 0.048639 0.045560 0.110743 0.148465 0. 7  
149289 0.147307  
NC\_003045. 0.013376 0.038837 0.036928 0.002516 0.001276 0.000290 0.001673 0.000000 0.032205 0.029452 7  
0.029566 0.032590 0.023113 0.025922 0.047949 0.047626 0.047852 0.048096 0.047995 0.047731 0.047736 0. 7  
047731 0.047725 0.047698 0.047650 0.047911 0.047788 0.048084 0.048162 0.045798 0.110505 0.146792 0. 7  
149051 0.147069  
AF208067.1 0.022949 0.012978 0.069133 0.032889 0.033223 0.032367 0.032443 0.032205 0.000000 0.002753 7  
0.002639 0.000636 0.029649 0.029233 0.030966 0.030885 0.031155 0.031043 0.031043 0.030911 0.030768 0. 7  
030877 0.030862 0.030877 0.030896 0.031084 0.030808 0.030712 0.030662 0.078003 0.078300 0.120933 0. 7  
116846 0.114864  
AF201929.1 0.021213 0.014599 0.066380 0.030136 0.030470 0.029614 0.029690 0.029452 0.002753 0.000000 7  
0.001428 0.003138 0.029046 0.028630 0.029230 0.029149 0.029419 0.029307 0.029307 0.029175 0.029032 0. 7  
029141 0.029126 0.029141 0.029160 0.029348 0.029072 0.028976 0.028926 0.075250 0.081053 0.122554 0. 7  
119599 0.117617  
AF208066.1 0.022271 0.014114 0.066494 0.030250 0.030584 0.029728 0.029804 0.029566 0.002639 0.001428 7  
0.000000 0.003024 0.030474 0.030058 0.030288 0.030207 0.030477 0.030365 0.030365 0.030233 0.030090 0. 7  
030199 0.030184 0.030199 0.030218 0.030406 0.030130 0.030034 0.029984 0.075364 0.080939 0.122069 0. 7  
119485 0.117503  
NC\_001846. 0.023119 0.012951 0.069518 0.033274 0.033608 0.032752 0.032828 0.032590 0.000636 0.003138 7  
0.003024 0.000000 0.029013 0.028597 0.030688 0.030607 0.030877 0.030765 0.030765 0.030633 0.030490 0. 7  
030599 0.030584 0.030599 0.030618 0.030806 0.030530 0.030434 0.030384 0.078388 0.077915 0.120906 0. 7  
116461 0.114479  
NC\_001451. 0.016951 0.041116 0.060041 0.023797 0.024131 0.023275 0.023351 0.023113 0.029649 0.029046 7  
0.030474 0.029013 0.000000 0.002809 0.037600 0.037582 0.037551 0.037560 0.037459 0.037590 0.037597 0. 7  
037557 0.037570 0.037523 0.037571 0.037423 0.037441 0.037865 0.037881 0.068911 0.087392 0.137707 0. 7  
125938 0.123956  
EU095850.1 0.016535 0.040700 0.062850 0.026606 0.026940 0.026084 0.026160 0.025922 0.029233 0.028630 7  
0.030058 0.028597 0.002809 0.000000 0.036644 0.036626 0.036595 0.036604 0.036503 0.036634 0.036641 0. 7  
036601 0.036614 0.036567 0.036615 0.036467 0.036485 0.036909 0.036925 0.071720 0.084583 0.136751 0. 7  
123129 0.121147  
AY278488.2 0.038478 0.037350 0.084877 0.048633 0.048967 0.048111 0.048358 0.047949 0.030966 0.029230 7  
0.030288 0.030688 0.037600 0.036644 0.000000 0.000384 0.000189 0.000265 0.000265 0.000262 0.000407 0. 7  
000262 0.000297 0.000262 0.000338 0.000258 0.000161 0.000383 0.000372 0.093747 0.065202 0.100107 0. 7  
101102 0.099120  
AY278741.1 0.038155 0.036966 0.084554 0.048310 0.048644 0.047788 0.048340 0.047626 0.030885 0.029149 7  
0.030207 0.030607 0.037582 0.036626 0.000384 0.000000 0.000527 0.000649 0.000649 0.000122 0.000117 0. 7  
000122 0.000099 0.000122 0.000046 0.000642 0.000225 0.000458 0.000536 0.093424 0.065121 0.100125 0. 7  
101425 0.099443  
AY278491.2 0.038381 0.037493 0.084780 0.048536 0.048870 0.048014 0.048309 0.047852 0.031155 0.029419 7  
0.030477 0.030877 0.037551 0.036595 0.000189 0.000527 0.000000 0.000244 0.000143 0.000405 0.000550 0. 7  
000405 0.000440 0.000405 0.000481 0.000128 0.000347 0.000526 0.000515 0.093650 0.065391 0.100156 0. 7

101199 0.099217  
AY278554.2 0.038625 0.037615 0.085024 0.048780 0.049114 0.048258 0.048334 0.048096 0.031043 0.029307 0.030365 0.030765 0.037560 0.036604 0.000265 0.000649 0.000244 0.000000 0.000101 0.000527 0.000672 0.000527 0.000562 0.000527 0.000603 0.000185 0.000424 0.000648 0.000637 0.093894 0.065279 0.100147 0.100955 0.098973  
AY282752.2 0.038524 0.037615 0.084923 0.048679 0.049013 0.048157 0.048233 0.047995 0.031043 0.029307 0.030365 0.030765 0.037459 0.036503 0.000265 0.000649 0.000143 0.000101 0.000000 0.000527 0.000672 0.000527 0.000562 0.000527 0.000603 0.000084 0.000424 0.000648 0.000637 0.093793 0.065279 0.100248 0.101056 0.099074  
AY283794.1 0.038260 0.037088 0.084659 0.048415 0.048749 0.047893 0.048348 0.047731 0.030911 0.029175 0.030233 0.030633 0.037590 0.036634 0.000262 0.000122 0.000405 0.000527 0.000527 0.000000 0.000145 0.000034 0.000049 0.000067 0.000081 0.000520 0.000149 0.000353 0.000431 0.093529 0.065147 0.100117 0.101320 0.099338  
AY283795.1 0.038265 0.036943 0.084664 0.048420 0.048754 0.047898 0.048355 0.047736 0.030768 0.029032 0.030090 0.030490 0.037597 0.036641 0.000407 0.000117 0.000550 0.000672 0.000672 0.000145 0.000000 0.000145 0.000110 0.000145 0.000128 0.000665 0.000248 0.000347 0.000425 0.093534 0.065004 0.100110 0.101314 0.099332  
AY283796.1 0.038260 0.037088 0.084659 0.048415 0.048749 0.047893 0.048315 0.047731 0.030877 0.029141 0.030199 0.030599 0.037557 0.036601 0.000262 0.000122 0.000405 0.000527 0.000527 0.000034 0.000145 0.000000 0.000035 0.000034 0.000081 0.000520 0.000116 0.000353 0.000431 0.093529 0.065113 0.100150 0.101320 0.099338  
AY283797.1 0.038254 0.037053 0.084653 0.048409 0.048743 0.047887 0.048328 0.047725 0.030862 0.029126 0.030184 0.030584 0.037570 0.036614 0.000297 0.000099 0.000440 0.000562 0.000562 0.000049 0.000110 0.000035 0.000000 0.000047 0.000075 0.000555 0.000138 0.000359 0.000437 0.093523 0.065098 0.100137 0.101326 0.099344  
AY283798.2 0.038227 0.037088 0.084626 0.048382 0.048716 0.047860 0.048281 0.047698 0.030877 0.029141 0.030199 0.030599 0.037523 0.036567 0.000262 0.000122 0.000405 0.000527 0.000527 0.000067 0.000145 0.000034 0.000047 0.000000 0.000076 0.000520 0.000103 0.000386 0.000464 0.093496 0.065113 0.100184 0.101353 0.099371  
AY291451.1 0.038179 0.037012 0.084578 0.048334 0.048668 0.047812 0.048329 0.047650 0.030896 0.029160 0.030218 0.030618 0.037571 0.036615 0.000338 0.000046 0.000481 0.000603 0.000603 0.000081 0.000128 0.000081 0.000075 0.000076 0.000000 0.000596 0.000179 0.000434 0.000512 0.093448 0.065132 0.100136 0.101401 0.099419  
NC\_004718. 0.038440 0.037608 0.084839 0.048595 0.048929 0.048073 0.048181 0.047911 0.031084 0.029348 0.030406 0.030806 0.037423 0.036467 0.000258 0.000642 0.000128 0.000185 0.000084 0.000520 0.000665 0.000520 0.000555 0.000520 0.000596 0.000000 0.000417 0.000641 0.000630 0.093709 0.065320 0.100284 0.101140 0.099158  
AY297028.1 0.038317 0.037191 0.084716 0.048472 0.048806 0.047950 0.048199 0.047788 0.030808 0.029072 0.030130 0.030530 0.037441 0.036485 0.000161 0.000225 0.000347 0.000424 0.000424 0.000149 0.000248 0.000116 0.000138 0.000103 0.000179 0.000417 0.000000 0.000424 0.000440 0.093586 0.065044 0.100266 0.101263 0.099281  
AY572034.1 0.038613 0.036967 0.085012 0.048768 0.049102 0.048246 0.048623 0.048084 0.030712 0.028976 0.030034 0.030434 0.037865 0.036909 0.000383 0.000458 0.000526 0.000648 0.000648 0.000353 0.000347 0.000353 0.000359 0.000386 0.000434 0.000641 0.000424 0.000000 0.000078 0.093882 0.064948 0.099842 0.100967 0.098985  
AY572035.1 0.038691 0.036978 0.085090 0.048846 0.049180 0.048324 0.048639 0.048162 0.030662 0.028926 0.029984 0.030384 0.037881 0.036925 0.000372 0.000536 0.000515 0.000637 0.000637 0.000431 0.000425 0.000431 0.000437 0.000464 0.000512 0.000630 0.000440 0.000078 0.000000 0.093960 0.064898 0.099826 0.100889 0.098907  
NC\_006577. 0.055269 0.068664 0.015150 0.045114 0.044780 0.045636 0.045560 0.045798 0.078003 0.075250 0.075364 0.078388 0.068911 0.071720 0.093747 0.093424 0.093650 0.093894 0.093793 0.093529 0.093534 0.093529 0.093523 0.093496 0.093448 0.093709 0.093586 0.093882 0.093960 0.000000 0.156303 0.179157 0.194849 0.192867  
NC\_001564. 0.101034 0.087639 0.147433 0.111189 0.111523 0.110667 0.110743 0.110505 0.078300 0.081053 0.080939 0.077915 0.087392 0.084583 0.065202 0.065121 0.065391 0.065279 0.065279 0.065147 0.065004 0.065113 0.065098 0.065113 0.065132 0.065320 0.065044 0.064948 0.064898 0.156303 0.000000 0.062985 0.065537 0.036564  
NC\_004102. 0.133415 0.110493 0.170287 0.148405 0.148068 0.147082 0.148465 0.146792 0.120933 0.122554 0.122069 0.120906 0.137707 0.136751 0.100107 0.100125 0.100156 0.100147 0.100248 0.100117 0.100110 0.100150 0.100137 0.100184 0.100136 0.100284 0.100266 0.099842 0.099826 0.179157 0.062985 0.000000 0.114706 0.081825  
NC\_001512. 0.139580 0.126185 0.185979 0.149735 0.150069 0.149213 0.149289 0.149051 0.116846 0.119599

0.119485 0.116461 0.125938 0.123129 0.101102 0.101425 0.101199 0.100955 0.101056 0.101320 0.101314 0.  
101320 0.101326 0.101353 0.101401 0.101140 0.101263 0.100967 0.100889 0.194849 0.065537 0.114706 0.  
000000 0.032881  
NC\_001544. 0.137598 0.124203 0.183997 0.147753 0.148087 0.147231 0.147307 0.147069 0.114864 0.117617  
0.117503 0.114479 0.123956 0.121147 0.099120 0.099443 0.099217 0.098973 0.099074 0.099338 0.099332 0.  
099338 0.099344 0.099371 0.099419 0.099158 0.099281 0.098985 0.098907 0.192867 0.036564 0.081825 0.  
032881 0.000000

30 bacterial whole genomes

30  
CP001598.1 0.000000 0.000002 0.008350 0.000036 0.040600 0.029651 0.040328 0.033443 0.039866 0.042664  
0.040806 0.138857 0.139792 0.140149 0.158535 0.149838 0.168940 0.168433 0.005037 0.019943 0.015584 0.  
010154 0.063563 0.063897 0.063537 0.064315 0.077344 0.076710 0.078638 0.078797  
AE016879.1 0.000002 0.000000 0.008352 0.000037 0.040598 0.029649 0.040326 0.033441 0.039864 0.042662  
0.040804 0.138857 0.139794 0.140149 0.158537 0.149840 0.168940 0.168435 0.005035 0.019941 0.015583 0.  
010152 0.063563 0.063897 0.063537 0.064315 0.077346 0.076710 0.078640 0.078799  
CP001215.1 0.008350 0.008352 0.000000 0.008325 0.047564 0.037122 0.047326 0.040818 0.041658 0.040121  
0.038899 0.147170 0.148099 0.148462 0.166295 0.158042 0.177253 0.176192 0.010981 0.024043 0.023357 0.  
018504 0.071876 0.072210 0.071850 0.072628 0.085284 0.085023 0.085713 0.085967  
AE017225.1 0.000036 0.000037 0.008325 0.000000 0.040587 0.029638 0.040315 0.033430 0.039853 0.042651  
0.040793 0.138858 0.139805 0.140150 0.158548 0.149851 0.168941 0.168446 0.005024 0.019930 0.015620 0.  
010179 0.063564 0.063898 0.063538 0.064316 0.077357 0.076711 0.078651 0.078810  
CP000976.1 0.040600 0.040598 0.047564 0.040587 0.000000 0.011975 0.000951 0.008583 0.007197 0.008693  
0.010006 0.179183 0.180392 0.180417 0.196678 0.188425 0.207636 0.206575 0.036583 0.024434 0.030338 0.  
033761 0.102825 0.102740 0.102233 0.103011 0.117944 0.117075 0.119238 0.119397  
CP000048.1 0.029651 0.029649 0.037122 0.029638 0.011975 0.000000 0.012892 0.003792 0.010215 0.013013  
0.011155 0.168234 0.169443 0.169468 0.184862 0.179489 0.195661 0.194600 0.026141 0.013079 0.019389 0.  
022682 0.091876 0.091791 0.090767 0.091136 0.106995 0.106126 0.108289 0.108448  
CP000993.1 0.040328 0.040326 0.047326 0.040315 0.000951 0.012892 0.000000 0.009500 0.008148 0.009644  
0.010957 0.178911 0.180120 0.180145 0.197595 0.189342 0.208553 0.207492 0.036345 0.025385 0.030066 0.  
034678 0.103176 0.103510 0.103150 0.103928 0.117672 0.116803 0.118966 0.119125  
CP000049.1 0.033443 0.033441 0.040818 0.033430 0.008583 0.003792 0.009500 0.000000 0.006559 0.009397  
0.007448 0.172026 0.173235 0.173260 0.188558 0.183281 0.199053 0.197992 0.029837 0.016775 0.023181 0.  
026474 0.095668 0.095583 0.094559 0.094928 0.110787 0.109918 0.112081 0.112240  
CP000246.1 0.039866 0.039864 0.041658 0.039853 0.007197 0.010215 0.008148 0.006559 0.000000 0.002838  
0.002809 0.178449 0.179658 0.179683 0.194654 0.186401 0.205612 0.204551 0.034829 0.019923 0.029604 0.  
032897 0.102091 0.102006 0.100982 0.101351 0.117210 0.116341 0.118504 0.118663  
CP000312.1 0.042664 0.042662 0.040121 0.042651 0.008693 0.013013 0.009644 0.009397 0.002838 0.000000  
0.001949 0.181247 0.182456 0.182481 0.197492 0.189239 0.208450 0.207389 0.037627 0.022721 0.032402 0.  
035695 0.104889 0.104804 0.103780 0.104149 0.120008 0.119139 0.121302 0.121461  
BA000016.3 0.040806 0.040804 0.038899 0.040793 0.010006 0.011155 0.010957 0.007448 0.002809 0.001949  
0.000000 0.179389 0.180598 0.180623 0.195543 0.187290 0.206501 0.205440 0.035769 0.020863 0.030544 0.  
033837 0.103031 0.102946 0.101922 0.102291 0.118150 0.117281 0.119444 0.119603  
CP000527.1 0.138857 0.138857 0.147170 0.138858 0.179183 0.168234 0.178911 0.172026 0.178449 0.181247  
0.179389 0.000000 0.001209 0.001292 0.019952 0.011255 0.030083 0.029850 0.143670 0.158526 0.153350 0.  
147645 0.078464 0.078899 0.078387 0.078788 0.063042 0.062527 0.061675 0.061439  
AE017285.1 0.139792 0.139794 0.148099 0.139805 0.180392 0.169443 0.180120 0.173235 0.179658 0.182456  
0.180598 0.001209 0.000000 0.000443 0.018743 0.010046 0.029154 0.028641 0.144829 0.159735 0.153447 0.  
148023 0.078842 0.079277 0.078765 0.079166 0.063139 0.063317 0.062386 0.062132  
CP002297.1 0.140149 0.140149 0.148462 0.140150 0.180417 0.169468 0.180145 0.173260 0.179683 0.182481  
0.180623 0.001292 0.000443 0.000000 0.018718 0.010021 0.028791 0.028616 0.144962 0.159760 0.153342 0.  
147580 0.078399 0.078834 0.078701 0.078723 0.063178 0.063439 0.062749 0.062495  
AM260480.1 0.158535 0.158537 0.166295 0.158548 0.196678 0.184862 0.197595 0.188558 0.194654 0.197492  
0.195543 0.019952 0.018743 0.018718 0.000000 0.009756 0.010957 0.009897 0.163572 0.178478 0.171121 0.  
166244 0.097063 0.097498 0.097419 0.097387 0.081191 0.082060 0.080582 0.080328  
CP000091.1 0.149838 0.149840 0.158042 0.149851 0.188425 0.179489 0.189342 0.183281 0.186401 0.189239  
0.187290 0.011255 0.010046 0.010021 0.009756 0.000000 0.019209 0.019079 0.154875 0.169781 0.161809 0.  
156807 0.087613 0.087740 0.088722 0.088353 0.072758 0.073363 0.072329 0.072075  
CP000578.1 0.168940 0.168940 0.177253 0.168941 0.207636 0.195661 0.208553 0.199053 0.205612 0.208450  
0.206501 0.030083 0.029154 0.028791 0.010957 0.019209 0.000000 0.001841 0.173753 0.186066 0.179709 0.

173875 0.106161 0.106246 0.107270 0.106901 0.091969 0.092230 0.091540 0.091286  
CP001151.1 0.168433 0.168435 0.176192 0.168446 0.206575 0.194600 0.207492 0.197992 0.204551 0.207389  
0.205440 0.029850 0.028641 0.028616 0.009897 0.019079 0.001841 0.000000 0.172692 0.185005 0.180420 0.  
175567 0.106386 0.106821 0.107317 0.106948 0.091089 0.091958 0.090479 0.090225  
AM295250.1 0.005037 0.005035 0.010981 0.005024 0.036583 0.026141 0.036345 0.029837 0.034829 0.037627  
0.035769 0.143670 0.144829 0.144962 0.163572 0.154875 0.173753 0.172692 0.000000 0.014906 0.013177 0.  
007523 0.068376 0.068710 0.068350 0.069128 0.082381 0.081523 0.083675 0.083834  
AE015929.1 0.019943 0.019941 0.024043 0.019930 0.024434 0.013079 0.025385 0.016775 0.019923 0.022721  
0.020863 0.158526 0.159735 0.159760 0.178478 0.169781 0.186066 0.185005 0.014906 0.000000 0.009681 0.  
012974 0.082168 0.082083 0.081059 0.081441 0.097287 0.096418 0.098581 0.098740  
AP006716.1 0.015584 0.015583 0.023357 0.015620 0.030338 0.019389 0.030066 0.023181 0.029604 0.032402  
0.030544 0.153350 0.153447 0.153342 0.171121 0.161809 0.179709 0.180420 0.013177 0.009681 0.000000 0.  
007464 0.075949 0.075933 0.077108 0.077116 0.090308 0.090823 0.092337 0.092478  
CP001837.1 0.010154 0.010152 0.018504 0.010179 0.033761 0.022682 0.034678 0.026474 0.032897 0.035695  
0.033837 0.147645 0.148023 0.147580 0.166244 0.156807 0.173875 0.175567 0.007523 0.012974 0.007464 0.  
000000 0.069194 0.069109 0.069644 0.069652 0.085252 0.085157 0.087484 0.087625  
AL590842.1 0.063563 0.063563 0.071876 0.063564 0.102825 0.091876 0.103176 0.095668 0.102091 0.104889  
0.103031 0.078464 0.078842 0.078399 0.097063 0.087613 0.106161 0.106386 0.068376 0.082168 0.075949 0.  
069194 0.000000 0.000435 0.001159 0.001167 0.016071 0.015976 0.018303 0.018444  
CP001585.1 0.063897 0.063897 0.072210 0.063898 0.102740 0.091791 0.103510 0.095583 0.102006 0.104804  
0.102946 0.078899 0.079277 0.078834 0.097498 0.087740 0.106246 0.106821 0.068710 0.082083 0.075933 0.  
069109 0.000435 0.000000 0.001175 0.001183 0.016506 0.016411 0.018738 0.018879  
AE009952.1 0.063537 0.063537 0.071850 0.063538 0.102233 0.090767 0.103150 0.094559 0.100982 0.103780  
0.101922 0.078387 0.078765 0.078701 0.097419 0.088722 0.107270 0.107317 0.068350 0.081059 0.077108 0.  
069644 0.001159 0.001175 0.000000 0.000778 0.016228 0.015899 0.018226 0.018367  
CP001593.1 0.064315 0.064315 0.072628 0.064316 0.103011 0.091136 0.103928 0.094928 0.101351 0.104149  
0.102291 0.078788 0.079166 0.078723 0.097387 0.088353 0.106901 0.106948 0.069128 0.081441 0.077116 0.  
069652 0.001167 0.001183 0.000778 0.000000 0.016395 0.016300 0.018627 0.018768  
CP001671.1 0.077344 0.077346 0.085284 0.077357 0.117944 0.106995 0.117672 0.110787 0.117210 0.120008  
0.118150 0.063042 0.063139 0.063178 0.081191 0.072758 0.091969 0.091089 0.082381 0.097287 0.090308 0.  
085252 0.016071 0.016506 0.016228 0.016395 0.000000 0.000869 0.002232 0.002373  
CP000468.1 0.076710 0.076710 0.085023 0.076711 0.117075 0.106126 0.116803 0.109918 0.116341 0.119139  
0.117281 0.062527 0.063317 0.063439 0.082060 0.073363 0.092230 0.091958 0.081523 0.096418 0.090823 0.  
085157 0.015976 0.016411 0.015899 0.016300 0.000869 0.000000 0.002327 0.002468  
CP001383.1 0.078638 0.078640 0.085713 0.078651 0.119238 0.108289 0.118966 0.112081 0.118504 0.121302  
0.119444 0.061675 0.062386 0.062749 0.080582 0.072329 0.091540 0.090479 0.083675 0.098581 0.092337 0.  
087484 0.018303 0.018738 0.018226 0.018627 0.002232 0.002327 0.000000 0.000254  
AE005674.2 0.078797 0.078799 0.085967 0.078810 0.119397 0.108448 0.119125 0.112240 0.118663 0.121461  
0.119603 0.061439 0.062132 0.062495 0.080328 0.072075 0.091286 0.090225 0.083834 0.098740 0.092478 0.  
087625 0.018444 0.018879 0.018367 0.018768 0.002373 0.002468 0.000254 0.000000

48 Hepatitis E virus (HEV) whole genomes

48

M73218.1\_H 0.000000 0.001774 0.006783 0.003638 0.003889 0.002809 0.001205 0.004025 0.002853 0.000970  
0.002667 0.000720 0.001114 0.003673 0.008408 0.006174 0.021784 0.030945 0.028636 0.030202 0.025812 0.  
032817 0.029633 0.027356 0.026203 0.026064 0.031316 0.025408 0.027585 0.025966 0.025548 0.025548 0.  
035569 0.027695 0.030782 0.031565 0.031215 0.032253 0.033867 0.033382 0.031538 0.031665 0.033938 0.  
033521 0.031608 0.037586 0.036433 0.033033  
D10330.1\_H 0.001774 0.000000 0.006814 0.002504 0.003426 0.002564 0.002075 0.004056 0.004627 0.002232  
0.002227 0.002357 0.000964 0.003704 0.008439 0.005773 0.021815 0.030976 0.028667 0.030233 0.025843 0.  
032848 0.029664 0.027387 0.026234 0.026095 0.031347 0.025439 0.027616 0.025997 0.025579 0.025579 0.  
035600 0.027726 0.030813 0.031596 0.031246 0.032284 0.033898 0.033413 0.031569 0.031696 0.033969 0.  
033552 0.031639 0.037617 0.036464 0.033064  
X99441.1\_H 0.006783 0.006814 0.000000 0.004310 0.003388 0.009378 0.005578 0.002758 0.004909 0.007049  
0.004587 0.006817 0.006370 0.003206 0.003266 0.002195 0.015000 0.024161 0.021852 0.023418 0.019028 0.  
026033 0.022849 0.020572 0.019419 0.019280 0.024532 0.018624 0.020801 0.019182 0.018764 0.018764 0.  
028785 0.020911 0.023998 0.024781 0.024431 0.025469 0.027083 0.026598 0.024754 0.024881 0.027154 0.  
026737 0.024824 0.030802 0.029649 0.026249  
AF076239.3 0.003638 0.002504 0.004310 0.000000 0.002876 0.005068 0.003742 0.001771 0.003837 0.003391  
0.001530 0.003535 0.003466 0.001472 0.005935 0.003269 0.019311 0.028472 0.026163 0.027729 0.023339 0.



|            |          |          |          |          |          |          |          |          |          |          |    |   |
|------------|----------|----------|----------|----------|----------|----------|----------|----------|----------|----------|----|---|
| 030344     | 0.027160 | 0.024883 | 0.023730 | 0.023591 | 0.028843 | 0.022935 | 0.025112 | 0.023493 | 0.023075 | 0.023075 | 0. | ↵ |
| 033096     | 0.025222 | 0.028309 | 0.029092 | 0.028742 | 0.029780 | 0.031394 | 0.030909 | 0.029065 | 0.029192 | 0.031465 | 0. | ↵ |
| 031048     | 0.029135 | 0.035113 | 0.033960 | 0.030560 |          |          |          |          |          |          |    |   |
| AF051830.1 | 0.003889 | 0.003426 | 0.003388 | 0.002876 | 0.000000 | 0.005990 | 0.003993 | 0.003977 | 0.005581 | 0.003661 |    | ↵ |
| 0.001371   | 0.003786 | 0.003717 | 0.003678 | 0.005013 | 0.002347 | 0.018389 | 0.027550 | 0.025241 | 0.026807 | 0.022417 | 0. | ↵ |
| 029422     | 0.026238 | 0.023961 | 0.022808 | 0.022669 | 0.027921 | 0.022013 | 0.024190 | 0.022571 | 0.022153 | 0.022153 | 0. | ↵ |
| 032174     | 0.024300 | 0.027387 | 0.028170 | 0.027820 | 0.028858 | 0.030472 | 0.029987 | 0.028143 | 0.028270 | 0.030543 | 0. | ↵ |
| 030126     | 0.028213 | 0.034191 | 0.033038 | 0.029638 |          |          |          |          |          |          |    |   |
| AF185822.1 | 0.002809 | 0.002564 | 0.009378 | 0.005068 | 0.005990 | 0.000000 | 0.003800 | 0.006620 | 0.005662 | 0.003267 |    | ↵ |
| 0.004791   | 0.003392 | 0.003008 | 0.006268 | 0.011003 | 0.008337 | 0.024379 | 0.033540 | 0.031231 | 0.032797 | 0.028407 | 0. | ↵ |
| 035412     | 0.032228 | 0.029951 | 0.028798 | 0.028659 | 0.033911 | 0.028003 | 0.030180 | 0.028561 | 0.028143 | 0.028143 | 0. | ↵ |
| 038164     | 0.030290 | 0.033377 | 0.034160 | 0.033810 | 0.034848 | 0.036462 | 0.035977 | 0.034133 | 0.034260 | 0.036533 | 0. | ↵ |
| 036116     | 0.034203 | 0.040181 | 0.039028 | 0.035628 |          |          |          |          |          |          |    |   |
| AF459438.1 | 0.001205 | 0.002075 | 0.005578 | 0.003742 | 0.003993 | 0.003800 | 0.000000 | 0.002820 | 0.002552 | 0.001978 |    | ↵ |
| 0.002771   | 0.001728 | 0.001174 | 0.003757 | 0.007426 | 0.006278 | 0.020579 | 0.029740 | 0.027431 | 0.028997 | 0.024607 | 0. | ↵ |
| 031612     | 0.028428 | 0.026151 | 0.024998 | 0.024859 | 0.030111 | 0.024203 | 0.026380 | 0.024761 | 0.024343 | 0.024343 | 0. | ↵ |
| 034364     | 0.026490 | 0.029577 | 0.030360 | 0.030010 | 0.031048 | 0.032662 | 0.032177 | 0.030333 | 0.030460 | 0.032733 | 0. | ↵ |
| 032316     | 0.030403 | 0.036381 | 0.035228 | 0.031828 |          |          |          |          |          |          |    |   |
| D11092.1_H | 0.004025 | 0.004056 | 0.002758 | 0.001771 | 0.003977 | 0.006620 | 0.002820 | 0.000000 | 0.002836 | 0.004291 |    | ↵ |
| 0.002606   | 0.004059 | 0.003612 | 0.001069 | 0.004685 | 0.003537 | 0.017759 | 0.026920 | 0.024611 | 0.026177 | 0.021787 | 0. | ↵ |
| 028792     | 0.025608 | 0.023331 | 0.022178 | 0.022039 | 0.027291 | 0.021383 | 0.023560 | 0.021941 | 0.021523 | 0.021523 | 0. | ↵ |
| 031544     | 0.023670 | 0.026757 | 0.027540 | 0.027190 | 0.028228 | 0.029842 | 0.029357 | 0.027513 | 0.027640 | 0.029913 | 0. | ↵ |
| 029496     | 0.027583 | 0.033561 | 0.032408 | 0.029008 |          |          |          |          |          |          |    |   |
| L25595.1_H | 0.002853 | 0.004627 | 0.004909 | 0.003837 | 0.005581 | 0.005662 | 0.002552 | 0.002836 | 0.000000 | 0.002395 |    | ↵ |
| 0.004210   | 0.002270 | 0.003726 | 0.003852 | 0.007521 | 0.006373 | 0.019910 | 0.029071 | 0.026762 | 0.028328 | 0.023938 | 0. | ↵ |
| 030943     | 0.027759 | 0.025482 | 0.024329 | 0.024190 | 0.029442 | 0.023534 | 0.025711 | 0.024092 | 0.023674 | 0.023674 | 0. | ↵ |
| 033695     | 0.025821 | 0.028908 | 0.029691 | 0.029341 | 0.030379 | 0.031993 | 0.031508 | 0.029664 | 0.029791 | 0.032064 | 0. | ↵ |
| 031647     | 0.029734 | 0.035712 | 0.034559 | 0.031159 |          |          |          |          |          |          |    |   |
| L08816.1_H | 0.000970 | 0.002232 | 0.007049 | 0.003391 | 0.003661 | 0.003267 | 0.001978 | 0.004291 | 0.002395 | 0.000000 |    | ↵ |
| 0.002462   | 0.000250 | 0.002084 | 0.003939 | 0.008674 | 0.006008 | 0.022050 | 0.031211 | 0.028902 | 0.030468 | 0.026078 | 0. | ↵ |
| 033083     | 0.029899 | 0.027622 | 0.026469 | 0.026330 | 0.031582 | 0.025674 | 0.027851 | 0.026232 | 0.025814 | 0.025814 | 0. | ↵ |
| 035835     | 0.027961 | 0.031048 | 0.031831 | 0.031481 | 0.032519 | 0.034133 | 0.033648 | 0.031804 | 0.031931 | 0.034204 | 0. | ↵ |
| 033787     | 0.031874 | 0.037852 | 0.036699 | 0.033299 |          |          |          |          |          |          |    |   |
| D11093.1_H | 0.002667 | 0.002227 | 0.004587 | 0.001530 | 0.001371 | 0.004791 | 0.002771 | 0.002606 | 0.004210 | 0.002462 |    | ↵ |
| 0.000000   | 0.002564 | 0.002495 | 0.002307 | 0.006212 | 0.003546 | 0.019588 | 0.028749 | 0.026440 | 0.028006 | 0.023616 | 0. | ↵ |
| 030621     | 0.027437 | 0.025160 | 0.024007 | 0.023868 | 0.029120 | 0.023212 | 0.025389 | 0.023770 | 0.023352 | 0.023352 | 0. | ↵ |
| 033373     | 0.025499 | 0.028586 | 0.029369 | 0.029019 | 0.030057 | 0.031671 | 0.031186 | 0.029342 | 0.029469 | 0.031742 | 0. | ↵ |
| 031325     | 0.029412 | 0.035390 | 0.034237 | 0.030837 |          |          |          |          |          |          |    |   |
| M94177.1_H | 0.000720 | 0.002357 | 0.006817 | 0.003535 | 0.003786 | 0.003392 | 0.001728 | 0.004059 | 0.002270 | 0.000250 |    | ↵ |
| 0.002564   | 0.000000 | 0.001834 | 0.003707 | 0.008442 | 0.006071 | 0.021818 | 0.030979 | 0.028670 | 0.030236 | 0.025846 | 0. | ↵ |
| 032851     | 0.029667 | 0.027390 | 0.026237 | 0.026098 | 0.031350 | 0.025442 | 0.027619 | 0.026000 | 0.025582 | 0.025582 | 0. | ↵ |
| 035603     | 0.027729 | 0.030816 | 0.031599 | 0.031249 | 0.032287 | 0.033901 | 0.033416 | 0.031572 | 0.031699 | 0.033972 | 0. | ↵ |
| 033555     | 0.031642 | 0.037620 | 0.036467 | 0.033067 |          |          |          |          |          |          |    |   |
| M80581.1_H | 0.001114 | 0.000964 | 0.006370 | 0.003466 | 0.003717 | 0.003008 | 0.001174 | 0.003612 | 0.003726 | 0.002084 |    | ↵ |
| 0.002495   | 0.001834 | 0.000000 | 0.003481 | 0.007995 | 0.006002 | 0.021371 | 0.030532 | 0.028223 | 0.029789 | 0.025399 | 0. | ↵ |
| 032404     | 0.029220 | 0.026943 | 0.025790 | 0.025651 | 0.030903 | 0.024995 | 0.027172 | 0.025553 | 0.025135 | 0.025135 | 0. | ↵ |
| 035156     | 0.027282 | 0.030369 | 0.031152 | 0.030802 | 0.031840 | 0.033454 | 0.032969 | 0.031125 | 0.031252 | 0.033525 | 0. | ↵ |
| 033108     | 0.031195 | 0.037173 | 0.036020 | 0.032620 |          |          |          |          |          |          |    |   |
| X98292.1_H | 0.003673 | 0.003704 | 0.003206 | 0.001472 | 0.003678 | 0.006268 | 0.003757 | 0.001069 | 0.003852 | 0.003939 |    | ↵ |
| 0.002307   | 0.003707 | 0.003481 | 0.000000 | 0.004734 | 0.002520 | 0.018110 | 0.027271 | 0.024962 | 0.026528 | 0.022138 | 0. | ↵ |
| 029143     | 0.025959 | 0.023682 | 0.022529 | 0.022390 | 0.027642 | 0.021734 | 0.023911 | 0.022292 | 0.021874 | 0.021874 | 0. | ↵ |
| 031895     | 0.024021 | 0.027108 | 0.027891 | 0.027541 | 0.028579 | 0.030193 | 0.029708 | 0.027864 | 0.027991 | 0.030264 | 0. | ↵ |
| 029847     | 0.027934 | 0.033912 | 0.032759 | 0.029359 |          |          |          |          |          |          |    |   |
| AY230202.1 | 0.008408 | 0.008439 | 0.003266 | 0.005935 | 0.005013 | 0.011003 | 0.007426 | 0.004685 | 0.007521 | 0.008674 |    | ↵ |
| 0.006212   | 0.008442 | 0.007995 | 0.004734 | 0.000000 | 0.002666 | 0.013375 | 0.022536 | 0.020227 | 0.021793 | 0.017403 | 0. | ↵ |
| 024408     | 0.021224 | 0.018947 | 0.017794 | 0.017655 | 0.022907 | 0.016999 | 0.019176 | 0.017557 | 0.017139 | 0.017139 | 0. | ↵ |
| 027160     | 0.019286 | 0.022373 | 0.023156 | 0.022806 | 0.023844 | 0.025458 | 0.024973 | 0.023129 | 0.023256 | 0.025529 | 0. | ↵ |
| 025112     | 0.023199 | 0.029177 | 0.028024 | 0.024624 |          |          |          |          |          |          |    |   |
| AY204877.1 | 0.006174 | 0.005773 | 0.002195 | 0.003269 | 0.002347 | 0.008337 | 0.006278 | 0.003537 | 0.006373 | 0.006008 |    | ↵ |
| 0.003546   | 0.006071 | 0.006002 | 0.002520 | 0.002666 | 0.000000 | 0.016042 | 0.025203 | 0.022894 | 0.024460 | 0.020070 | 0. | ↵ |
| 027075     | 0.023891 | 0.021614 | 0.020461 | 0.020322 | 0.025574 | 0.019666 | 0.021843 | 0.020224 | 0.019806 | 0.019806 | 0. | ↵ |
| 029827     | 0.021953 | 0.025040 | 0.025823 | 0.025473 | 0.026511 | 0.028125 | 0.027640 | 0.025796 | 0.025923 | 0.028196 | 0. | ↵ |



|            |          |          |          |          |          |          |          |          |          |          |    |   |
|------------|----------|----------|----------|----------|----------|----------|----------|----------|----------|----------|----|---|
| 0.025389   | 0.027619 | 0.027172 | 0.023911 | 0.019176 | 0.021843 | 0.005801 | 0.004638 | 0.002734 | 0.004401 | 0.004262 | 0. | ↵ |
| 007226     | 0.002846 | 0.000623 | 0.002820 | 0.002766 | 0.004105 | 0.002370 | 0.000000 | 0.001812 | 0.002231 | 0.002230 | 0. | ↵ |
| 007984     | 0.005149 | 0.005055 | 0.006590 | 0.005910 | 0.007248 | 0.007566 | 0.008092 | 0.006701 | 0.006488 | 0.008786 | 0. | ↵ |
| 008369     | 0.006157 | 0.010001 | 0.009822 | 0.007319 |          |          |          |          |          |          |    | ↵ |
| AB189073.1 | 0.025966 | 0.025997 | 0.019182 | 0.023493 | 0.022571 | 0.028561 | 0.024761 | 0.021941 | 0.024092 | 0.026232 | ↵  | ↵ |
| 0.023770   | 0.026000 | 0.025553 | 0.022292 | 0.017557 | 0.020224 | 0.004182 | 0.006450 | 0.003085 | 0.005876 | 0.003332 | 0. | ↵ |
| 009038     | 0.004658 | 0.001953 | 0.001606 | 0.002183 | 0.005917 | 0.000558 | 0.001812 | 0.000000 | 0.000418 | 0.000418 | 0. | ↵ |
| 009603     | 0.003466 | 0.006867 | 0.008402 | 0.007722 | 0.009060 | 0.009378 | 0.009904 | 0.008513 | 0.008300 | 0.010598 | 0. | ↵ |
| 010181     | 0.007969 | 0.011620 | 0.011634 | 0.009131 |          |          |          |          |          |          |    | ↵ |
| AB189074.1 | 0.025548 | 0.025579 | 0.018764 | 0.023075 | 0.022153 | 0.028143 | 0.024343 | 0.021523 | 0.023674 | 0.025814 | ↵  | ↵ |
| 0.023352   | 0.025582 | 0.025135 | 0.021874 | 0.017139 | 0.019806 | 0.004457 | 0.006869 | 0.003504 | 0.006295 | 0.003751 | 0. | ↵ |
| 009457     | 0.005077 | 0.001808 | 0.001328 | 0.001905 | 0.006336 | 0.000140 | 0.002231 | 0.000418 | 0.000000 | 0.000139 | 0. | ↵ |
| 010021     | 0.003745 | 0.007286 | 0.008821 | 0.008141 | 0.009479 | 0.009797 | 0.010323 | 0.008932 | 0.008719 | 0.011017 | 0. | ↵ |
| 010600     | 0.008388 | 0.012038 | 0.012053 | 0.009550 |          |          |          |          |          |          |    | ↵ |
| AB189075.1 | 0.025548 | 0.025579 | 0.018764 | 0.023075 | 0.022153 | 0.028143 | 0.024343 | 0.021523 | 0.023674 | 0.025814 | ↵  | ↵ |
| 0.023352   | 0.025582 | 0.025135 | 0.021874 | 0.017139 | 0.019806 | 0.004318 | 0.006868 | 0.003503 | 0.006294 | 0.003750 | 0. | ↵ |
| 009456     | 0.005076 | 0.001814 | 0.001467 | 0.002044 | 0.006335 | 0.000279 | 0.002230 | 0.000418 | 0.000139 | 0.000000 | 0. | ↵ |
| 010021     | 0.003606 | 0.007285 | 0.008820 | 0.008140 | 0.009478 | 0.009796 | 0.010322 | 0.008931 | 0.008718 | 0.011016 | 0. | ↵ |
| 010599     | 0.008387 | 0.012038 | 0.012052 | 0.009549 |          |          |          |          |          |          |    | ↵ |
| AB073912.1 | 0.035569 | 0.035600 | 0.028785 | 0.033096 | 0.032174 | 0.038164 | 0.034364 | 0.031544 | 0.033695 | 0.035835 | ↵  | ↵ |
| 0.033373   | 0.035603 | 0.035156 | 0.031895 | 0.027160 | 0.029827 | 0.013785 | 0.006741 | 0.006933 | 0.007707 | 0.009757 | 0. | ↵ |
| 005320     | 0.005936 | 0.008213 | 0.009365 | 0.009505 | 0.004253 | 0.010161 | 0.007984 | 0.009603 | 0.010021 | 0.010021 | 0. | ↵ |
| 000000     | 0.009129 | 0.006089 | 0.006439 | 0.006760 | 0.005531 | 0.004169 | 0.005217 | 0.005849 | 0.005727 | 0.005217 | 0. | ↵ |
| 005078     | 0.005401 | 0.004194 | 0.004453 | 0.007216 |          |          |          |          |          |          |    | ↵ |
| AF455784.1 | 0.027695 | 0.027726 | 0.020911 | 0.025222 | 0.024300 | 0.030290 | 0.026490 | 0.023670 | 0.025821 | 0.027961 | ↵  | ↵ |
| 0.025499   | 0.027729 | 0.027282 | 0.024021 | 0.019286 | 0.021953 | 0.005911 | 0.008398 | 0.005033 | 0.007824 | 0.005280 | 0. | ↵ |
| 010986     | 0.006606 | 0.005219 | 0.003828 | 0.004597 | 0.007865 | 0.003884 | 0.005149 | 0.003466 | 0.003745 | 0.003606 | 0. | ↵ |
| 009129     | 0.000000 | 0.008815 | 0.010350 | 0.009670 | 0.011008 | 0.011326 | 0.011852 | 0.010461 | 0.010248 | 0.012546 | 0. | ↵ |
| 012129     | 0.009917 | 0.013324 | 0.013582 | 0.011079 |          |          |          |          |          |          |    | ↵ |
| AB097812.1 | 0.030782 | 0.030813 | 0.023998 | 0.028309 | 0.027387 | 0.033377 | 0.029577 | 0.026757 | 0.028908 | 0.031048 | ↵  | ↵ |
| 0.028586   | 0.030816 | 0.030369 | 0.027108 | 0.022373 | 0.025040 | 0.010760 | 0.001231 | 0.003782 | 0.002028 | 0.004970 | 0. | ↵ |
| 002171     | 0.002209 | 0.005678 | 0.007875 | 0.007821 | 0.002449 | 0.007425 | 0.005055 | 0.006867 | 0.007286 | 0.007285 | 0. | ↵ |
| 006089     | 0.008815 | 0.000000 | 0.001535 | 0.000855 | 0.002193 | 0.003085 | 0.003037 | 0.001646 | 0.001433 | 0.003731 | 0. | ↵ |
| 003314     | 0.001102 | 0.006804 | 0.005651 | 0.002264 |          |          |          |          |          |          |    | ↵ |
| AB099347.1 | 0.031565 | 0.031596 | 0.024781 | 0.029092 | 0.028170 | 0.034160 | 0.030360 | 0.027540 | 0.029691 | 0.031831 | ↵  | ↵ |
| 0.029369   | 0.031599 | 0.031152 | 0.027891 | 0.023156 | 0.025823 | 0.012295 | 0.001952 | 0.005317 | 0.002526 | 0.005753 | 0. | ↵ |
| 001252     | 0.003744 | 0.007213 | 0.009410 | 0.009356 | 0.002799 | 0.008960 | 0.006590 | 0.008402 | 0.008821 | 0.008820 | 0. | ↵ |
| 006439     | 0.010350 | 0.001535 | 0.000000 | 0.000680 | 0.000908 | 0.002302 | 0.001817 | 0.000729 | 0.000712 | 0.002373 | 0. | ↵ |
| 001956     | 0.001038 | 0.006021 | 0.004868 | 0.001516 |          |          |          |          |          |          |    | ↵ |
| AB080575.1 | 0.031215 | 0.031246 | 0.024431 | 0.028742 | 0.027820 | 0.033810 | 0.030010 | 0.027190 | 0.029341 | 0.031481 | ↵  | ↵ |
| 0.029019   | 0.031249 | 0.030802 | 0.027541 | 0.022806 | 0.025473 | 0.011615 | 0.001272 | 0.004637 | 0.001846 | 0.005403 | 0. | ↵ |
| 001602     | 0.003064 | 0.006533 | 0.008730 | 0.008676 | 0.003120 | 0.008280 | 0.005910 | 0.007722 | 0.008141 | 0.008140 | 0. | ↵ |
| 006760     | 0.009670 | 0.000855 | 0.000680 | 0.000000 | 0.001530 | 0.002652 | 0.002182 | 0.001379 | 0.001161 | 0.002876 | 0. | ↵ |
| 002459     | 0.001359 | 0.006371 | 0.005218 | 0.001818 |          |          |          |          |          |          |    | ↵ |
| AB074915.3 | 0.032253 | 0.032284 | 0.025469 | 0.029780 | 0.028858 | 0.034848 | 0.031048 | 0.028228 | 0.030379 | 0.032519 | ↵  | ↵ |
| 0.030057   | 0.032287 | 0.031840 | 0.028579 | 0.023844 | 0.026511 | 0.012953 | 0.002610 | 0.005975 | 0.003310 | 0.006441 | 0. | ↵ |
| 000564     | 0.004402 | 0.007871 | 0.010068 | 0.010014 | 0.003143 | 0.009618 | 0.007248 | 0.009060 | 0.009479 | 0.009478 | 0. | ↵ |
| 005531     | 0.011008 | 0.002193 | 0.000908 | 0.001530 | 0.000000 | 0.001614 | 0.001129 | 0.000715 | 0.000760 | 0.001685 | 0. | ↵ |
| 001268     | 0.001091 | 0.005333 | 0.004180 | 0.002396 |          |          |          |          |          |          |    | ↵ |
| AB074917.3 | 0.033867 | 0.033898 | 0.027083 | 0.031394 | 0.030472 | 0.036462 | 0.032662 | 0.029842 | 0.031993 | 0.034133 | ↵  | ↵ |
| 0.031671   | 0.033901 | 0.033454 | 0.030193 | 0.025458 | 0.028125 | 0.013271 | 0.002928 | 0.006293 | 0.003665 | 0.008055 | 0. | ↵ |
| 001151     | 0.004720 | 0.008189 | 0.010386 | 0.010332 | 0.003461 | 0.009936 | 0.007566 | 0.009378 | 0.009797 | 0.009796 | 0. | ↵ |
| 004169     | 0.011326 | 0.003085 | 0.002302 | 0.002652 | 0.001614 | 0.000000 | 0.001048 | 0.002329 | 0.002202 | 0.001220 | 0. | ↵ |
| 000909     | 0.002259 | 0.003719 | 0.002566 | 0.003047 |          |          |          |          |          |          |    | ↵ |
| AB161717.1 | 0.033382 | 0.033413 | 0.026598 | 0.030909 | 0.029987 | 0.035977 | 0.032177 | 0.029357 | 0.031508 | 0.033648 | ↵  | ↵ |
| 0.031186   | 0.033416 | 0.032969 | 0.029708 | 0.024973 | 0.027640 | 0.013797 | 0.003454 | 0.006819 | 0.004028 | 0.007570 | 0. | ↵ |
| 000866     | 0.005246 | 0.008715 | 0.010912 | 0.010858 | 0.003987 | 0.010462 | 0.008092 | 0.009904 | 0.010323 | 0.010322 | 0. | ↵ |
| 005217     | 0.011852 | 0.003037 | 0.001817 | 0.002182 | 0.001129 | 0.001048 | 0.000000 | 0.001844 | 0.001717 | 0.000694 | 0. | ↵ |
| 000278     | 0.001935 | 0.004204 | 0.003051 | 0.002423 |          |          |          |          |          |          |    | ↵ |
| AB091395.1 | 0.031538 | 0.031569 | 0.024754 | 0.029065 | 0.028143 | 0.034133 | 0.030333 | 0.027513 | 0.029664 | 0.031804 | ↵  | ↵ |
| 0.029342   | 0.031572 | 0.031125 | 0.027864 | 0.023129 | 0.025796 | 0.012406 | 0.002362 | 0.005428 | 0.003159 | 0.005726 | 0. | ↵ |
| 001279     | 0.003855 | 0.007324 | 0.009521 | 0.009467 | 0.002596 | 0.009071 | 0.006701 | 0.008513 | 0.008932 | 0.008931 | 0. | ↵ |

005849 0.010461 0.001646 0.000729 0.001379 0.000715 0.002329 0.001844 0.000000 0.000218 0.002400 0. 7  
001983 0.000544 0.006048 0.004895 0.002245  
AB200239.1 0.031665 0.031696 0.024881 0.029192 0.028270 0.034260 0.030460 0.027640 0.029791 0.031931 7  
0.029469 0.031699 0.031252 0.027991 0.023256 0.025923 0.012193 0.002144 0.005215 0.002941 0.005853 0. 7  
001152 0.003642 0.007111 0.009308 0.009254 0.002383 0.008858 0.006488 0.008300 0.008719 0.008718 0. 7  
005727 0.010248 0.001433 0.000712 0.001161 0.000760 0.002202 0.001717 0.000218 0.000000 0.002298 0. 7  
001881 0.000331 0.005921 0.004768 0.002027  
AB161718.1 0.033938 0.033969 0.027154 0.031465 0.030543 0.036533 0.032733 0.029913 0.032064 0.034204 7  
0.031742 0.033972 0.033525 0.030264 0.025529 0.028196 0.014491 0.004148 0.007513 0.004722 0.008126 0. 7  
001560 0.005940 0.009409 0.011606 0.011552 0.004681 0.011156 0.008786 0.010598 0.011017 0.011016 0. 7  
005217 0.012546 0.003731 0.002373 0.002876 0.001685 0.001220 0.000694 0.002400 0.002298 0.000000 0. 7  
000417 0.002629 0.003648 0.002495 0.002562  
AB161719.1 0.033521 0.033552 0.026737 0.031048 0.030126 0.036116 0.032316 0.029496 0.031647 0.033787 7  
0.031325 0.033555 0.033108 0.029847 0.025112 0.027779 0.014074 0.003731 0.007096 0.004305 0.007709 0. 7  
001143 0.005523 0.008992 0.011189 0.011135 0.004264 0.010739 0.008369 0.010181 0.010600 0.010599 0. 7  
005078 0.012129 0.003314 0.001956 0.002459 0.001268 0.000909 0.000278 0.001983 0.001881 0.000417 0. 7  
000000 0.002212 0.004065 0.002912 0.002701  
AB097811.1 0.031608 0.031639 0.024824 0.029135 0.028213 0.034203 0.030403 0.027583 0.029734 0.031874 7  
0.029412 0.031642 0.031195 0.027934 0.023199 0.025866 0.011862 0.002196 0.004884 0.002993 0.005796 0. 7  
001209 0.003311 0.006780 0.008977 0.008923 0.002052 0.008527 0.006157 0.007969 0.008388 0.008387 0. 7  
005401 0.009917 0.001102 0.001038 0.001359 0.001091 0.002259 0.001935 0.000544 0.000331 0.002629 0. 7  
002212 0.000000 0.005978 0.004825 0.002079  
AY594199.1 0.037586 0.037617 0.030802 0.035113 0.034191 0.040181 0.036381 0.033561 0.035712 0.037852 7  
0.035390 0.037620 0.037173 0.033912 0.029177 0.031844 0.015802 0.006641 0.008950 0.007384 0.011774 0. 7  
004769 0.007953 0.010230 0.012383 0.012330 0.006270 0.012178 0.010001 0.011620 0.012038 0.012038 0. 7  
004194 0.013324 0.006804 0.006021 0.006371 0.005333 0.003719 0.004204 0.006048 0.005921 0.003648 0. 7  
004065 0.005978 0.000000 0.001153 0.004553  
AJ272108.1 0.036433 0.036464 0.029649 0.033960 0.033038 0.039028 0.035228 0.032408 0.034559 0.036699 7  
0.034237 0.036467 0.036020 0.032759 0.028024 0.030691 0.015527 0.005488 0.008549 0.006231 0.010621 0. 7  
003616 0.006976 0.010445 0.012642 0.012588 0.005717 0.012192 0.009822 0.011634 0.012053 0.012052 0. 7  
004453 0.013582 0.005651 0.004868 0.005218 0.004180 0.002566 0.003051 0.004895 0.004768 0.002495 0. 7  
002912 0.004825 0.001153 0.000000 0.003637  
AB108537.1 0.033033 0.033064 0.026249 0.030560 0.029638 0.035628 0.031828 0.029008 0.031159 0.033299 7  
0.030837 0.033067 0.032620 0.029359 0.024624 0.027291 0.013024 0.002681 0.006046 0.003255 0.007221 0. 7  
002019 0.004473 0.007942 0.010139 0.010085 0.003576 0.009689 0.007319 0.009131 0.009550 0.009549 0. 7  
007216 0.011079 0.002264 0.001516 0.001818 0.002396 0.003047 0.002423 0.002245 0.002027 0.002562 0. 7  
002701 0.002079 0.004553 0.003637 0.000000

## 24 Eutherian mammal sequences

24

X58533.1\_R 0.000000 0.014391 0.039530 0.014631 0.026769 0.002626 0.014092 0.014741 0.008869 0.016469 7  
0.009505 0.044183 0.058718 0.036920 0.071142 0.025380 0.023122 0.023122 0.020545 0.023291 0.013332 0. 7  
026981 0.024616 0.021426  
S95936.1\_t 0.014391 0.000000 0.028169 0.014493 0.014893 0.015052 0.027967 0.028158 0.022744 0.030344 7  
0.021328 0.032822 0.047357 0.025044 0.059266 0.015217 0.017347 0.017757 0.014892 0.015092 0.022477 0. 7  
015456 0.012740 0.014888  
U02564.1\_B 0.039530 0.028169 0.000000 0.038987 0.030085 0.041339 0.052226 0.054271 0.039919 0.049621 7  
0.049035 0.015419 0.019188 0.017977 0.045601 0.032069 0.034199 0.034609 0.031744 0.031944 0.039329 0. 7  
032308 0.032925 0.031740  
D38380.1\_R 0.014631 0.014493 0.038987 0.000000 0.012138 0.017257 0.022401 0.017781 0.019049 0.015851 7  
0.011447 0.043640 0.058175 0.030689 0.056511 0.010749 0.014649 0.010133 0.008937 0.012001 0.013370 0. 7  
012350 0.009985 0.008507  
NM\_008522. 0.026769 0.014893 0.030085 0.012138 0.000000 0.029395 0.034305 0.029919 0.023869 0.022508 7  
0.023585 0.031766 0.046301 0.018815 0.046649 0.003614 0.010536 0.006431 0.006224 0.005465 0.014894 0. 7  
003846 0.005812 0.005343  
NM\_002343. 0.002626 0.015052 0.041339 0.017257 0.029395 0.000000 0.014247 0.014438 0.009024 0.016624 7  
0.007696 0.045992 0.060527 0.039546 0.073768 0.028006 0.025748 0.025748 0.023171 0.025917 0.015958 0. 7  
029607 0.027242 0.024052  
X78902.1\_C 0.014092 0.027967 0.052226 0.022401 0.034305 0.014247 0.000000 0.006240 0.012305 0.015824 7  
0.014168 0.056879 0.071414 0.044456 0.078678 0.032916 0.030658 0.030658 0.028081 0.030827 0.020868 0. 7

034517 0.032152 0.028962  
AJ005203.1 0.014741 0.028158 0.054271 0.017781 0.029919 0.014438 0.006240 0.000000 0.014350 0.011438 0.007928 0.058924 0.073459 0.045973 0.074292 0.028530 0.029933 0.026272 0.024221 0.027285 0.019371 0.030131 0.027766 0.024576  
X57084.1\_B 0.008869 0.022744 0.039919 0.019049 0.023869 0.009024 0.012305 0.014350 0.000000 0.009699 0.010816 0.044572 0.059107 0.034020 0.068242 0.022480 0.020222 0.020222 0.017645 0.020391 0.010432 0.024081 0.026110 0.018526  
AJ131674.1 0.016469 0.030344 0.049621 0.015851 0.022508 0.016624 0.015824 0.011438 0.009699 0.000000 0.009016 0.054274 0.068809 0.041323 0.062854 0.018894 0.025283 0.020767 0.019571 0.022635 0.014721 0.018693 0.018989 0.019141  
M92089.1\_S 0.009505 0.021328 0.049035 0.011447 0.023585 0.007696 0.014168 0.007928 0.010816 0.009016 0.000000 0.053688 0.068223 0.040737 0.067958 0.022196 0.024697 0.020181 0.018985 0.022049 0.014135 0.023797 0.021432 0.018555  
AF092510.1 0.044183 0.032822 0.015419 0.043640 0.031766 0.045992 0.056879 0.058924 0.044572 0.054274 0.053688 0.000000 0.014583 0.018869 0.033247 0.035380 0.035091 0.035501 0.034703 0.032836 0.040221 0.035612 0.037578 0.035133  
X54530.1\_X 0.058718 0.047357 0.019188 0.058175 0.046301 0.060527 0.071414 0.073459 0.059107 0.068809 0.068223 0.014583 0.000000 0.033452 0.045693 0.049915 0.049674 0.050084 0.049238 0.047419 0.054804 0.050147 0.052113 0.049668  
D88801.1\_P 0.036920 0.025044 0.017977 0.030689 0.018815 0.039546 0.044456 0.045973 0.034020 0.041323 0.040737 0.018869 0.033452 0.000000 0.043205 0.022429 0.016222 0.020556 0.021752 0.018688 0.026602 0.022661 0.024627 0.022182  
AH008271.2 0.071142 0.059266 0.045601 0.056511 0.046649 0.073768 0.078678 0.074292 0.068242 0.062854 0.067958 0.033247 0.045693 0.043205 0.000000 0.046407 0.057185 0.053080 0.051595 0.052114 0.061543 0.044814 0.046526 0.050280  
L20313.1\_S 0.025380 0.015217 0.032069 0.010749 0.003614 0.028006 0.032916 0.028530 0.022480 0.018894 0.022196 0.035380 0.049915 0.022429 0.046407 0.000000 0.010778 0.006673 0.005188 0.005707 0.015136 0.001600 0.005295 0.003954  
D89091.1\_S 0.023122 0.017347 0.034199 0.014649 0.010536 0.025748 0.030658 0.029933 0.020222 0.025283 0.024697 0.035091 0.049674 0.016222 0.057185 0.010778 0.000000 0.004516 0.005712 0.005071 0.010562 0.012371 0.016073 0.006905  
D89088.1\_S 0.023122 0.017757 0.034609 0.010133 0.006431 0.025748 0.030658 0.026272 0.020222 0.020767 0.020181 0.035501 0.050084 0.020556 0.053080 0.006673 0.004516 0.000000 0.002865 0.002665 0.009790 0.008266 0.011968 0.002869  
D89090.1\_S 0.020545 0.014892 0.031744 0.008937 0.006224 0.023171 0.028081 0.024221 0.017645 0.019571 0.018985 0.034703 0.049238 0.021752 0.051595 0.005188 0.005712 0.002865 0.000000 0.003064 0.009948 0.006781 0.010483 0.001315  
D89089.1\_S 0.023291 0.015092 0.031944 0.012001 0.005465 0.025917 0.030827 0.027285 0.020391 0.022635 0.022049 0.032836 0.047419 0.018688 0.052114 0.005707 0.005071 0.002665 0.003064 0.000000 0.009959 0.007300 0.011002 0.003494  
D89086.2\_0 0.013332 0.022477 0.039329 0.013370 0.014894 0.015958 0.020868 0.019371 0.010432 0.014721 0.014135 0.040221 0.054804 0.026602 0.061543 0.015136 0.010562 0.009790 0.009948 0.009959 0.000000 0.016729 0.020431 0.011263  
D89083.1\_0 0.026981 0.015456 0.032308 0.012350 0.003846 0.029607 0.034517 0.030131 0.024081 0.018693 0.023797 0.035612 0.050147 0.022661 0.044814 0.001600 0.012371 0.008266 0.006781 0.007300 0.016729 0.000000 0.004101 0.005555  
D89084.1\_0 0.024616 0.012740 0.032925 0.009985 0.005812 0.027242 0.032152 0.027766 0.026110 0.018989 0.021432 0.037578 0.052113 0.024627 0.046526 0.005295 0.016073 0.011968 0.010483 0.011002 0.020431 0.004101 0.000000 0.009168  
D89085.1\_0 0.021426 0.014888 0.031740 0.008507 0.005343 0.024052 0.028962 0.024576 0.018526 0.019141 0.018555 0.035133 0.049668 0.022182 0.050280 0.003954 0.006905 0.002869 0.001315 0.003494 0.011263 0.005555 0.009168 0.000000

58 genome datasets from different species

58

V00662.1\_H 0.000000 0.005647 0.004698 0.005499 0.007525 0.006900 0.010812 0.012034 0.015085 0.084152 0.085775 0.085933 0.085828 0.085775 0.104468 0.104667 0.104945 0.105014 0.104424 0.112568 0.112586 0.112617 0.112608 0.112709 0.112578 0.112571 0.112611 0.112598 0.112645 0.138241 0.140015 0.137790 0.138763 0.140969 0.141050 0.137940 0.136992 0.135387 0.137783 0.139598 0.159249 0.153439 0.153723 0.144747 0.135197 0.136078 0.133332 0.133501 0.132922 0.160170 0.120456 0.143490 0.188915 0.189660 0.



|            |          |          |          |          |          |          |          |          |          |          |    |   |
|------------|----------|----------|----------|----------|----------|----------|----------|----------|----------|----------|----|---|
| 0.000159   | 0.000000 | 0.000159 | 0.000159 | 0.018535 | 0.018734 | 0.019012 | 0.019081 | 0.018491 | 0.041211 | 0.041534 | 0. | ↰ |
| 041308     | 0.041064 | 0.041165 | 0.041429 | 0.041423 | 0.041429 | 0.041435 | 0.041462 | 0.144534 | 0.146308 | 0.144083 | 0. | ↰ |
| 145056     | 0.147262 | 0.147343 | 0.144233 | 0.143285 | 0.141680 | 0.144076 | 0.145891 | 0.098584 | 0.092774 | 0.093058 | 0. | ↰ |
| 084082     | 0.074532 | 0.075413 | 0.072667 | 0.072836 | 0.063366 | 0.074237 | 0.070010 | 0.068193 | 0.128250 | 0.128995 | 0. | ↰ |
| 128752     | 0.130753 | 0.123648 | 0.128027 |          |          |          |          |          |          |          |    |   |
| KC545394.1 | 0.085828 | 0.080384 | 0.081457 | 0.080329 | 0.091008 | 0.078928 | 0.075787 | 0.097862 | 0.100913 | 0.001676 | ↰  |   |
| 0.000053   | 0.000159 | 0.000000 | 0.000106 | 0.018640 | 0.018839 | 0.019117 | 0.019186 | 0.018596 | 0.041370 | 0.041693 | 0. | ↰ |
| 041467     | 0.041223 | 0.041324 | 0.041588 | 0.041582 | 0.041588 | 0.041594 | 0.041621 | 0.144481 | 0.146255 | 0.144030 | 0. | ↰ |
| 145003     | 0.147209 | 0.147290 | 0.144180 | 0.143232 | 0.141627 | 0.144023 | 0.145838 | 0.098478 | 0.092668 | 0.092952 | 0. | ↰ |
| 083976     | 0.074426 | 0.075307 | 0.072561 | 0.072730 | 0.063313 | 0.074342 | 0.069957 | 0.068087 | 0.128144 | 0.128889 | 0. | ↰ |
| 128646     | 0.130647 | 0.123542 | 0.127921 |          |          |          |          |          |          |          |    |   |
| KC545396.1 | 0.085775 | 0.080331 | 0.081404 | 0.080276 | 0.090955 | 0.078875 | 0.075734 | 0.097809 | 0.100860 | 0.001623 | ↰  |   |
| 0.000053   | 0.000159 | 0.000106 | 0.000000 | 0.018693 | 0.018892 | 0.019170 | 0.019239 | 0.018649 | 0.041370 | 0.041693 | 0. | ↰ |
| 041467     | 0.041223 | 0.041324 | 0.041588 | 0.041582 | 0.041588 | 0.041594 | 0.041621 | 0.144534 | 0.146308 | 0.144083 | 0. | ↰ |
| 145056     | 0.147262 | 0.147343 | 0.144233 | 0.143285 | 0.141680 | 0.144076 | 0.145891 | 0.098584 | 0.092774 | 0.093058 | 0. | ↰ |
| 084082     | 0.074532 | 0.075413 | 0.072667 | 0.072836 | 0.063366 | 0.074395 | 0.070010 | 0.068193 | 0.128250 | 0.128995 | 0. | ↰ |
| 128752     | 0.130753 | 0.123648 | 0.128027 |          |          |          |          |          |          |          |    |   |
| AF522874.1 | 0.104468 | 0.099024 | 0.100097 | 0.098969 | 0.109648 | 0.097568 | 0.094427 | 0.116502 | 0.119553 | 0.020316 | ↰  |   |
| 0.018693   | 0.018535 | 0.018640 | 0.018693 | 0.000000 | 0.000798 | 0.000477 | 0.001002 | 0.001154 | 0.029509 | 0.029893 | 0. | ↰ |
| 029366     | 0.029244 | 0.029244 | 0.029771 | 0.029916 | 0.029771 | 0.029806 | 0.029771 | 0.143324 | 0.145098 | 0.142873 | 0. | ↰ |
| 143846     | 0.146052 | 0.146133 | 0.143023 | 0.142075 | 0.140470 | 0.142866 | 0.144681 | 0.092220 | 0.086410 | 0.086694 | 0. | ↰ |
| 077718     | 0.068168 | 0.069049 | 0.066303 | 0.066472 | 0.062156 | 0.055702 | 0.068800 | 0.061829 | 0.121886 | 0.122631 | 0. | ↰ |
| 122388     | 0.124389 | 0.117284 | 0.121663 |          |          |          |          |          |          |          |    |   |
| AB050936.1 | 0.104667 | 0.099223 | 0.100296 | 0.099168 | 0.109847 | 0.097767 | 0.094626 | 0.116701 | 0.119752 | 0.020515 | ↰  |   |
| 0.018892   | 0.018734 | 0.018839 | 0.018892 | 0.000798 | 0.000000 | 0.000405 | 0.000347 | 0.000700 | 0.028998 | 0.029382 | 0. | ↰ |
| 028855     | 0.028733 | 0.028733 | 0.029260 | 0.029405 | 0.029260 | 0.029295 | 0.029260 | 0.142813 | 0.144587 | 0.142362 | 0. | ↰ |
| 143335     | 0.145541 | 0.145622 | 0.142512 | 0.141564 | 0.139959 | 0.142355 | 0.144170 | 0.091422 | 0.085612 | 0.085896 | 0. | ↰ |
| 076920     | 0.067370 | 0.068251 | 0.065505 | 0.065674 | 0.061645 | 0.055503 | 0.068289 | 0.061031 | 0.121088 | 0.121833 | 0. | ↰ |
| 121590     | 0.123591 | 0.116486 | 0.120865 |          |          |          |          |          |          |          |    |   |
| JX477166.1 | 0.104945 | 0.099501 | 0.100574 | 0.099446 | 0.110125 | 0.098045 | 0.094904 | 0.116979 | 0.120030 | 0.020793 | ↰  |   |
| 0.019170   | 0.019012 | 0.019117 | 0.019170 | 0.000477 | 0.000405 | 0.000000 | 0.000526 | 0.000894 | 0.029403 | 0.029787 | 0. | ↰ |
| 029260     | 0.029138 | 0.029138 | 0.029665 | 0.029810 | 0.029665 | 0.029700 | 0.029665 | 0.143218 | 0.144992 | 0.142767 | 0. | ↰ |
| 143740     | 0.145946 | 0.146027 | 0.142917 | 0.141969 | 0.140364 | 0.142760 | 0.144575 | 0.091744 | 0.085934 | 0.086218 | 0. | ↰ |
| 077242     | 0.067692 | 0.068573 | 0.065827 | 0.065996 | 0.062050 | 0.055225 | 0.068694 | 0.061353 | 0.121410 | 0.122155 | 0. | ↰ |
| 121912     | 0.123913 | 0.116808 | 0.121187 |          |          |          |          |          |          |          |    |   |
| FJ621585.1 | 0.105014 | 0.099570 | 0.100643 | 0.099515 | 0.110194 | 0.098114 | 0.094973 | 0.117048 | 0.120099 | 0.020862 | ↰  |   |
| 0.019239   | 0.019081 | 0.019186 | 0.019239 | 0.001002 | 0.000347 | 0.000526 | 0.000000 | 0.000713 | 0.029128 | 0.029512 | 0. | ↰ |
| 028985     | 0.028863 | 0.028863 | 0.029390 | 0.029535 | 0.029390 | 0.029425 | 0.029390 | 0.142943 | 0.144717 | 0.142492 | 0. | ↰ |
| 143465     | 0.145671 | 0.145752 | 0.142642 | 0.141694 | 0.140089 | 0.142485 | 0.144300 | 0.091218 | 0.085408 | 0.085692 | 0. | ↰ |
| 076716     | 0.067166 | 0.068047 | 0.065301 | 0.065470 | 0.061775 | 0.055156 | 0.068419 | 0.060827 | 0.120884 | 0.121629 | 0. | ↰ |
| 121386     | 0.123387 | 0.116282 | 0.120661 |          |          |          |          |          |          |          |    |   |
| FJ621583.1 | 0.104424 | 0.098980 | 0.100053 | 0.098925 | 0.109604 | 0.097524 | 0.094383 | 0.116458 | 0.119509 | 0.020272 | ↰  |   |
| 0.018649   | 0.018491 | 0.018596 | 0.018649 | 0.001154 | 0.000700 | 0.000894 | 0.000713 | 0.000000 | 0.029099 | 0.029483 | 0. | ↰ |
| 028956     | 0.028834 | 0.028834 | 0.029361 | 0.029506 | 0.029361 | 0.029396 | 0.029361 | 0.142914 | 0.144688 | 0.142463 | 0. | ↰ |
| 143436     | 0.145642 | 0.145723 | 0.142613 | 0.141665 | 0.140060 | 0.142456 | 0.144271 | 0.091066 | 0.085256 | 0.085540 | 0. | ↰ |
| 076564     | 0.067014 | 0.067895 | 0.065149 | 0.065318 | 0.061746 | 0.055746 | 0.068390 | 0.060675 | 0.120732 | 0.121477 | 0. | ↰ |
| 121234     | 0.123235 | 0.116130 | 0.120509 |          |          |          |          |          |          |          |    |   |
| AY278488.2 | 0.112568 | 0.107124 | 0.108197 | 0.107069 | 0.117748 | 0.105668 | 0.102527 | 0.124602 | 0.127653 | 0.042229 | ↰  |   |
| 0.041370   | 0.041211 | 0.041370 | 0.041370 | 0.029509 | 0.028998 | 0.029403 | 0.029128 | 0.029099 | 0.000000 | 0.000384 | 0. | ↰ |
| 000189     | 0.000265 | 0.000265 | 0.000262 | 0.000407 | 0.000262 | 0.000297 | 0.000262 | 0.121003 | 0.121034 | 0.114219 | 0. | ↰ |
| 118530     | 0.117608 | 0.123598 | 0.119798 | 0.116978 | 0.119129 | 0.121269 | 0.118807 | 0.091967 | 0.086068 | 0.096884 | 0. | ↰ |
| 076915     | 0.079942 | 0.081257 | 0.081776 | 0.086847 | 0.035506 | 0.047602 | 0.039291 | 0.052051 | 0.112175 | 0.114112 | 0. | ↰ |
| 113101     | 0.114611 | 0.113835 | 0.111885 |          |          |          |          |          |          |          |    |   |
| AY278741.1 | 0.112586 | 0.107142 | 0.108215 | 0.107087 | 0.117766 | 0.105686 | 0.102545 | 0.124620 | 0.127671 | 0.042552 | ↰  |   |
| 0.041693   | 0.041534 | 0.041693 | 0.041693 | 0.029893 | 0.029382 | 0.029787 | 0.029512 | 0.029483 | 0.000384 | 0.000000 | 0. | ↰ |
| 000527     | 0.000649 | 0.000649 | 0.000122 | 0.000117 | 0.000122 | 0.000099 | 0.000122 | 0.121021 | 0.121052 | 0.114237 | 0. | ↰ |
| 118548     | 0.117626 | 0.123616 | 0.119816 | 0.116996 | 0.119147 | 0.121287 | 0.118825 | 0.092290 | 0.086391 | 0.097207 | 0. | ↰ |
| 077238     | 0.080265 | 0.081580 | 0.082099 | 0.087170 | 0.035425 | 0.047584 | 0.038907 | 0.051970 | 0.112498 | 0.114435 | 0. | ↰ |
| 113424     | 0.114530 | 0.114158 | 0.111949 |          |          |          |          |          |          |          |    |   |
| AY278491.2 | 0.112617 | 0.107173 | 0.108246 | 0.107118 | 0.117797 | 0.105717 | 0.102576 | 0.124651 | 0.127702 | 0.042326 | ↰  |   |
| 0.041467   | 0.041308 | 0.041467 | 0.041467 | 0.029366 | 0.028855 | 0.029260 | 0.028985 | 0.028956 | 0.000189 | 0.000527 | 0. | ↰ |
| 000000     | 0.000244 | 0.000143 | 0.000405 | 0.000550 | 0.000405 | 0.000440 | 0.000405 | 0.121052 | 0.121083 | 0.114268 | 0. | ↰ |

|            |          |          |          |          |          |          |          |          |          |          |    |   |
|------------|----------|----------|----------|----------|----------|----------|----------|----------|----------|----------|----|---|
| 118579     | 0.117657 | 0.123647 | 0.119847 | 0.117027 | 0.119178 | 0.121318 | 0.118856 | 0.092064 | 0.086165 | 0.096981 | 0. | ↻ |
| 077012     | 0.080039 | 0.081354 | 0.081873 | 0.086944 | 0.035695 | 0.047553 | 0.039434 | 0.052240 | 0.112297 | 0.114209 | 0. | ↻ |
| 113198     | 0.114800 | 0.113932 | 0.112074 |          |          |          |          |          |          |          |    |   |
| AY278554.2 | 0.112608 | 0.107164 | 0.108237 | 0.107109 | 0.117788 | 0.105708 | 0.102567 | 0.124642 | 0.127693 | 0.042082 |    | ↻ |
| 0.041223   | 0.041064 | 0.041223 | 0.041223 | 0.029244 | 0.028733 | 0.029138 | 0.028863 | 0.028834 | 0.000265 | 0.000649 | 0. | ↻ |
| 000244     | 0.000000 | 0.000101 | 0.000527 | 0.000672 | 0.000527 | 0.000562 | 0.000527 | 0.121043 | 0.121074 | 0.114259 | 0. | ↻ |
| 118570     | 0.117648 | 0.123638 | 0.119838 | 0.117018 | 0.119169 | 0.121309 | 0.118847 | 0.091820 | 0.085921 | 0.096737 | 0. | ↻ |
| 076768     | 0.079795 | 0.081110 | 0.081629 | 0.086700 | 0.035583 | 0.047562 | 0.039556 | 0.052128 | 0.112185 | 0.113965 | 0. | ↻ |
| 112954     | 0.114688 | 0.113688 | 0.111962 |          |          |          |          |          |          |          |    |   |
| AY282752.2 | 0.112709 | 0.107265 | 0.108338 | 0.107210 | 0.117889 | 0.105809 | 0.102668 | 0.124743 | 0.127794 | 0.042183 |    | ↻ |
| 0.041324   | 0.041165 | 0.041324 | 0.041324 | 0.029244 | 0.028733 | 0.029138 | 0.028863 | 0.028834 | 0.000265 | 0.000649 | 0. | ↻ |
| 000143     | 0.000101 | 0.000000 | 0.000527 | 0.000672 | 0.000527 | 0.000562 | 0.000527 | 0.121144 | 0.121175 | 0.114360 | 0. | ↻ |
| 118671     | 0.117749 | 0.123739 | 0.119939 | 0.117119 | 0.119270 | 0.121410 | 0.118948 | 0.091921 | 0.086022 | 0.096838 | 0. | ↻ |
| 076869     | 0.079896 | 0.081211 | 0.081730 | 0.086801 | 0.035583 | 0.047461 | 0.039556 | 0.052128 | 0.112185 | 0.114066 | 0. | ↻ |
| 113055     | 0.114688 | 0.113789 | 0.111962 |          |          |          |          |          |          |          |    |   |
| AY283794.1 | 0.112578 | 0.107134 | 0.108207 | 0.107079 | 0.117758 | 0.105678 | 0.102537 | 0.124612 | 0.127663 | 0.042447 |    | ↻ |
| 0.041588   | 0.041429 | 0.041588 | 0.041588 | 0.029771 | 0.029260 | 0.029665 | 0.029390 | 0.029361 | 0.000262 | 0.000122 | 0. | ↻ |
| 000405     | 0.000527 | 0.000527 | 0.000000 | 0.000145 | 0.000034 | 0.000049 | 0.000067 | 0.121013 | 0.121044 | 0.114229 | 0. | ↻ |
| 118540     | 0.117618 | 0.123608 | 0.119808 | 0.116988 | 0.119139 | 0.121279 | 0.118817 | 0.092185 | 0.086286 | 0.097102 | 0. | ↻ |
| 077133     | 0.080160 | 0.081475 | 0.081994 | 0.087065 | 0.035451 | 0.047592 | 0.039029 | 0.051996 | 0.112393 | 0.114330 | 0. | ↻ |
| 113319     | 0.114556 | 0.114053 | 0.111844 |          |          |          |          |          |          |          |    |   |
| AY283795.1 | 0.112571 | 0.107127 | 0.108200 | 0.107072 | 0.117751 | 0.105671 | 0.102530 | 0.124605 | 0.127656 | 0.042441 |    | ↻ |
| 0.041582   | 0.041423 | 0.041582 | 0.041582 | 0.029916 | 0.029405 | 0.029810 | 0.029535 | 0.029506 | 0.000407 | 0.000117 | 0. | ↻ |
| 000550     | 0.000672 | 0.000672 | 0.000145 | 0.000000 | 0.000145 | 0.000110 | 0.000145 | 0.121006 | 0.121037 | 0.114222 | 0. | ↻ |
| 118533     | 0.117611 | 0.123601 | 0.119801 | 0.116981 | 0.119132 | 0.121272 | 0.118810 | 0.092179 | 0.086280 | 0.097096 | 0. | ↻ |
| 077127     | 0.080154 | 0.081469 | 0.081988 | 0.087059 | 0.035308 | 0.047599 | 0.038884 | 0.051853 | 0.112387 | 0.114324 | 0. | ↻ |
| 113313     | 0.114413 | 0.114047 | 0.111838 |          |          |          |          |          |          |          |    |   |
| AY283796.1 | 0.112611 | 0.107167 | 0.108240 | 0.107112 | 0.117791 | 0.105711 | 0.102570 | 0.124645 | 0.127696 | 0.042447 |    | ↻ |
| 0.041588   | 0.041429 | 0.041588 | 0.041588 | 0.029771 | 0.029260 | 0.029665 | 0.029390 | 0.029361 | 0.000262 | 0.000122 | 0. | ↻ |
| 000405     | 0.000527 | 0.000527 | 0.000034 | 0.000145 | 0.000000 | 0.000035 | 0.000034 | 0.121046 | 0.121077 | 0.114262 | 0. | ↻ |
| 118573     | 0.117651 | 0.123641 | 0.119841 | 0.117021 | 0.119172 | 0.121312 | 0.118850 | 0.092185 | 0.086286 | 0.097102 | 0. | ↻ |
| 077133     | 0.080160 | 0.081475 | 0.081994 | 0.087065 | 0.035417 | 0.047559 | 0.039029 | 0.051962 | 0.112393 | 0.114330 | 0. | ↻ |
| 113319     | 0.114522 | 0.114053 | 0.111844 |          |          |          |          |          |          |          |    |   |
| AY283797.1 | 0.112598 | 0.107154 | 0.108227 | 0.107099 | 0.117778 | 0.105698 | 0.102557 | 0.124632 | 0.127683 | 0.042453 |    | ↻ |
| 0.041594   | 0.041435 | 0.041594 | 0.041594 | 0.029806 | 0.029295 | 0.029700 | 0.029425 | 0.029396 | 0.000297 | 0.000099 | 0. | ↻ |
| 000440     | 0.000562 | 0.000562 | 0.000049 | 0.000110 | 0.000035 | 0.000000 | 0.000047 | 0.121033 | 0.121064 | 0.114249 | 0. | ↻ |
| 118560     | 0.117638 | 0.123628 | 0.119828 | 0.117008 | 0.119159 | 0.121299 | 0.118837 | 0.092191 | 0.086292 | 0.097108 | 0. | ↻ |
| 077139     | 0.080166 | 0.081481 | 0.082000 | 0.087071 | 0.035402 | 0.047572 | 0.038994 | 0.051947 | 0.112399 | 0.114336 | 0. | ↻ |
| 113325     | 0.114507 | 0.114059 | 0.111850 |          |          |          |          |          |          |          |    |   |
| AY283798.2 | 0.112645 | 0.107201 | 0.108274 | 0.107146 | 0.117825 | 0.105745 | 0.102604 | 0.124679 | 0.127730 | 0.042480 |    | ↻ |
| 0.041621   | 0.041462 | 0.041621 | 0.041621 | 0.029771 | 0.029260 | 0.029665 | 0.029390 | 0.029361 | 0.000262 | 0.000122 | 0. | ↻ |
| 000405     | 0.000527 | 0.000527 | 0.000067 | 0.000145 | 0.000034 | 0.000047 | 0.000000 | 0.121080 | 0.121111 | 0.114296 | 0. | ↻ |
| 118607     | 0.117685 | 0.123675 | 0.119875 | 0.117055 | 0.119206 | 0.121346 | 0.118884 | 0.092218 | 0.086319 | 0.097135 | 0. | ↻ |
| 077166     | 0.080193 | 0.081508 | 0.082027 | 0.087098 | 0.035417 | 0.047525 | 0.039029 | 0.051962 | 0.112426 | 0.114363 | 0. | ↻ |
| 113352     | 0.114522 | 0.114086 | 0.111877 |          |          |          |          |          |          |          |    |   |
| M73218.1_H | 0.138241 | 0.142341 | 0.140396 | 0.138206 | 0.134964 | 0.143501 | 0.149054 | 0.134561 | 0.133977 | 0.143934 |    | ↻ |
| 0.144481   | 0.144534 | 0.144481 | 0.144534 | 0.143324 | 0.142813 | 0.143218 | 0.142943 | 0.142914 | 0.121003 | 0.121021 | 0. | ↻ |
| 121052     | 0.121043 | 0.121144 | 0.121013 | 0.121006 | 0.121046 | 0.121033 | 0.121080 | 0.000000 | 0.001774 | 0.006784 | 0. | ↻ |
| 003638     | 0.003889 | 0.002809 | 0.001205 | 0.004025 | 0.002853 | 0.000970 | 0.002667 | 0.073114 | 0.065418 | 0.074531 | 0. | ↻ |
| 086284     | 0.083973 | 0.084403 | 0.087467 | 0.090115 | 0.141357 | 0.168605 | 0.128891 | 0.151925 | 0.084805 | 0.086083 | 0. | ↻ |
| 085750     | 0.087511 | 0.086384 | 0.085743 |          |          |          |          |          |          |          |    |   |
| D10330.1_H | 0.140015 | 0.144115 | 0.142170 | 0.139980 | 0.136738 | 0.145275 | 0.150828 | 0.136335 | 0.135751 | 0.145708 |    | ↻ |
| 0.146255   | 0.146308 | 0.146255 | 0.146308 | 0.145098 | 0.144587 | 0.144992 | 0.144717 | 0.144688 | 0.121034 | 0.121052 | 0. | ↻ |
| 121083     | 0.121074 | 0.121175 | 0.121044 | 0.121037 | 0.121077 | 0.121064 | 0.121111 | 0.001774 | 0.000000 | 0.006815 | 0. | ↻ |
| 002504     | 0.003426 | 0.002564 | 0.002075 | 0.004056 | 0.004627 | 0.002232 | 0.002227 | 0.074888 | 0.067192 | 0.076305 | 0. | ↻ |
| 088058     | 0.085747 | 0.086177 | 0.089241 | 0.091889 | 0.141388 | 0.168636 | 0.128922 | 0.151956 | 0.084836 | 0.086114 | 0. | ↻ |
| 085781     | 0.087542 | 0.087300 | 0.085774 |          |          |          |          |          |          |          |    |   |
| X99441.1_H | 0.137790 | 0.141890 | 0.139945 | 0.137755 | 0.134513 | 0.143050 | 0.148603 | 0.134110 | 0.133526 | 0.143483 |    | ↻ |
| 0.144030   | 0.144083 | 0.144030 | 0.144083 | 0.142873 | 0.142362 | 0.142767 | 0.142492 | 0.142463 | 0.114219 | 0.114237 | 0. | ↻ |
| 114268     | 0.114259 | 0.114360 | 0.114229 | 0.114222 | 0.114262 | 0.114249 | 0.114296 | 0.006784 | 0.006815 | 0.000000 | 0. | ↻ |
| 004311     | 0.003389 | 0.009379 | 0.005579 | 0.002759 | 0.004910 | 0.007050 | 0.004588 | 0.072663 | 0.064967 | 0.074080 | 0. | ↻ |
| 085833     | 0.083522 | 0.083952 | 0.087016 | 0.089664 | 0.134573 | 0.161821 | 0.122107 | 0.145141 | 0.078021 | 0.079704 | 0. | ↻ |



078966 0.080727 0.085075 0.078959  
AF076239.3 0.138763 0.142863 0.140918 0.138728 0.135486 0.144023 0.149576 0.135083 0.134499 0.144456 0.145003 0.145056 0.145003 0.145056 0.143846 0.143335 0.143740 0.143465 0.143436 0.118530 0.118548 0.118579 0.118570 0.118671 0.118540 0.118533 0.118573 0.118560 0.118607 0.003638 0.002504 0.004311 0.000000 0.002876 0.005068 0.003742 0.001771 0.003837 0.003392 0.001530 0.073636 0.065940 0.075053 0.086806 0.084495 0.084925 0.087989 0.090637 0.138884 0.166132 0.126418 0.149452 0.082332 0.083610 0.083277 0.085038 0.086048 0.083270  
AF051830.1 0.140969 0.145069 0.143124 0.140934 0.137692 0.146229 0.151782 0.137289 0.136705 0.146662 0.147209 0.147262 0.147209 0.147262 0.146052 0.145541 0.145946 0.145671 0.145642 0.117608 0.117626 0.117657 0.117648 0.117749 0.117618 0.117611 0.117651 0.117638 0.117685 0.003889 0.003426 0.003389 0.002876 0.000000 0.005990 0.003993 0.003977 0.005581 0.003661 0.001371 0.075842 0.068146 0.077259 0.089012 0.086701 0.087131 0.090195 0.092843 0.137962 0.165210 0.125496 0.148530 0.081410 0.082883 0.082355 0.084116 0.088254 0.082348  
AF185822.1 0.141050 0.145150 0.143205 0.141015 0.137773 0.146310 0.151863 0.137370 0.136786 0.146743 0.147290 0.147343 0.147290 0.147343 0.146133 0.145622 0.146027 0.145752 0.145723 0.123598 0.123616 0.123647 0.123638 0.123739 0.123608 0.123601 0.123641 0.123628 0.123675 0.002809 0.002564 0.009379 0.005068 0.005990 0.000000 0.003800 0.006620 0.005662 0.003267 0.004791 0.075923 0.068227 0.077340 0.089093 0.086782 0.087212 0.090276 0.092924 0.143952 0.171200 0.131486 0.154520 0.087400 0.088678 0.088345 0.090106 0.088979 0.088338  
AF459438.1 0.137940 0.142040 0.140095 0.137905 0.134663 0.143200 0.148753 0.134260 0.133676 0.143633 0.144180 0.144233 0.144180 0.144233 0.143023 0.142512 0.142917 0.142642 0.142613 0.119798 0.119816 0.119847 0.119838 0.119939 0.119808 0.119801 0.119841 0.119828 0.119875 0.001205 0.002075 0.005579 0.003742 0.003993 0.003800 0.000000 0.002820 0.002552 0.001978 0.002771 0.072813 0.065117 0.074230 0.085983 0.083672 0.084102 0.087166 0.089814 0.140152 0.167400 0.127686 0.150720 0.083600 0.084878 0.084545 0.086306 0.085225 0.084538  
D11092.1\_H 0.136992 0.141092 0.139147 0.136957 0.133715 0.142252 0.147805 0.133312 0.132728 0.142685 0.143232 0.143285 0.143232 0.143285 0.142075 0.141564 0.141969 0.141694 0.141665 0.116978 0.116996 0.117027 0.117018 0.117119 0.116988 0.116981 0.117021 0.117008 0.117055 0.004025 0.004056 0.002759 0.001771 0.003977 0.006620 0.002820 0.000000 0.002836 0.004291 0.002606 0.071865 0.064169 0.073282 0.085035 0.082724 0.083154 0.086218 0.088866 0.137332 0.164580 0.124866 0.147900 0.080780 0.082058 0.081725 0.083486 0.084277 0.081718  
L25595.1\_H 0.135387 0.139487 0.137542 0.135352 0.132110 0.140647 0.146200 0.131707 0.131123 0.141080 0.141627 0.141680 0.141627 0.141680 0.140470 0.139959 0.140364 0.140089 0.140060 0.119129 0.119147 0.119178 0.119169 0.119270 0.119139 0.119132 0.119172 0.119159 0.119206 0.002853 0.004627 0.004910 0.003837 0.005581 0.005662 0.002552 0.002836 0.000000 0.002395 0.004210 0.070260 0.062564 0.071677 0.083430 0.081119 0.081549 0.084613 0.087261 0.139483 0.166731 0.127017 0.150051 0.082931 0.084209 0.083876 0.085637 0.084510 0.083869  
L08816.1\_H 0.137783 0.141883 0.139938 0.137748 0.134506 0.143043 0.148596 0.134103 0.133519 0.143476 0.144023 0.144076 0.144023 0.144076 0.142866 0.142355 0.142760 0.142485 0.142456 0.121269 0.121287 0.121318 0.121309 0.121410 0.121279 0.121272 0.121312 0.121299 0.121346 0.000970 0.002232 0.007050 0.003392 0.003661 0.003267 0.001978 0.004291 0.002395 0.000000 0.002462 0.072656 0.064960 0.074073 0.085826 0.083515 0.083945 0.087009 0.089657 0.141623 0.168871 0.129157 0.152191 0.085071 0.086349 0.086016 0.087777 0.086650 0.086009  
D11093.1\_H 0.139598 0.143698 0.141753 0.139563 0.136321 0.144858 0.150411 0.135918 0.135334 0.145291 0.145838 0.145891 0.145838 0.145891 0.144681 0.144170 0.144575 0.144300 0.144271 0.118807 0.118825 0.118856 0.118847 0.118948 0.118817 0.118810 0.118850 0.118837 0.118884 0.002667 0.002227 0.004588 0.001530 0.001371 0.004791 0.002771 0.002606 0.004210 0.002462 0.000000 0.074471 0.066775 0.075888 0.087641 0.085330 0.085760 0.088824 0.091472 0.139161 0.166409 0.126695 0.149729 0.082609 0.083887 0.083554 0.085315 0.086883 0.083547  
NM\_002343. 0.159249 0.163551 0.161730 0.158585 0.153627 0.159300 0.165512 0.158298 0.158692 0.098747 0.098531 0.098584 0.098478 0.098584 0.092220 0.091422 0.091744 0.091218 0.091066 0.091967 0.092290 0.092064 0.091820 0.091921 0.092185 0.092179 0.092185 0.092191 0.092218 0.073114 0.074888 0.072663 0.073636 0.075842 0.075923 0.072813 0.071865 0.070260 0.072656 0.074471 0.000000 0.007696 0.009024 0.015052 0.024052 0.023171 0.025917 0.025748 0.109463 0.119005 0.105571 0.098866 0.029666 0.030411 0.030168 0.032169 0.025064 0.029443  
M92089.1\_S 0.153439 0.157741 0.155920 0.152775 0.147817 0.153490 0.159702 0.152488 0.152882 0.092937 0.092721 0.092774 0.092668 0.092774 0.086410 0.085612 0.085934 0.085408 0.085256 0.086068 0.086391 0.086165 0.085921 0.086022 0.086286 0.086280 0.086286 0.086292 0.086319 0.065418 0.067192 0.064967 0.065940 0.068146 0.068227 0.065117 0.064169 0.062564 0.064960 0.066775 0.007696 0.000000 0.010816 0.021328 0.018555 0.018985 0.022049 0.024697 0.103564 0.113106 0.099672 0.092967 0.035476 0.036221 0.035978 0.037979 0.030874 0.035253  
X57084.1\_B 0.153723 0.158025 0.156204 0.153059 0.148101 0.153774 0.159986 0.152772 0.153166 0.093221

|            |          |          |          |          |          |          |          |          |          |          |    |   |
|------------|----------|----------|----------|----------|----------|----------|----------|----------|----------|----------|----|---|
| 0.093005   | 0.093058 | 0.092952 | 0.093058 | 0.086694 | 0.085896 | 0.086218 | 0.085692 | 0.085540 | 0.096884 | 0.097207 | 0. | ↵ |
| 096981     | 0.096737 | 0.096838 | 0.097102 | 0.097096 | 0.097102 | 0.097108 | 0.097135 | 0.074531 | 0.076305 | 0.074080 | 0. | ↵ |
| 075053     | 0.077259 | 0.077340 | 0.074230 | 0.073282 | 0.071677 | 0.074073 | 0.075888 | 0.009024 | 0.010816 | 0.000000 | 0. | ↵ |
| 022744     | 0.018526 | 0.017645 | 0.020391 | 0.020222 | 0.114380 | 0.123922 | 0.110488 | 0.103783 | 0.035192 | 0.035937 | 0. | ↵ |
| 035694     | 0.037695 | 0.030590 | 0.034969 |          |          |          |          |          |          |          |    |   |
| S95936.1_t | 0.144747 | 0.149049 | 0.147228 | 0.144083 | 0.139125 | 0.144798 | 0.151010 | 0.143796 | 0.144190 | 0.084245 | ↵  |   |
| 0.084029   | 0.084082 | 0.083976 | 0.084082 | 0.077718 | 0.076920 | 0.077242 | 0.076716 | 0.076564 | 0.076915 | 0.077238 | 0. | ↵ |
| 077012     | 0.076768 | 0.076869 | 0.077133 | 0.077127 | 0.077133 | 0.077139 | 0.077166 | 0.086284 | 0.088058 | 0.085833 | 0. | ↵ |
| 086806     | 0.089012 | 0.089093 | 0.085983 | 0.085035 | 0.083430 | 0.085826 | 0.087641 | 0.015052 | 0.021328 | 0.022744 | 0. | ↵ |
| 000000     | 0.014888 | 0.014892 | 0.015092 | 0.017347 | 0.094411 | 0.103953 | 0.090519 | 0.083814 | 0.044168 | 0.044913 | 0. | ↵ |
| 044670     | 0.046671 | 0.039566 | 0.043945 |          |          |          |          |          |          |          |    |   |
| D89085.1_0 | 0.135197 | 0.139499 | 0.137678 | 0.134533 | 0.129575 | 0.135248 | 0.141460 | 0.134246 | 0.134640 | 0.074695 | ↵  |   |
| 0.074479   | 0.074532 | 0.074426 | 0.074532 | 0.068168 | 0.067370 | 0.067692 | 0.067166 | 0.067014 | 0.079942 | 0.080265 | 0. | ↵ |
| 080039     | 0.079795 | 0.079896 | 0.080160 | 0.080154 | 0.080160 | 0.080166 | 0.080193 | 0.083973 | 0.085747 | 0.083522 | 0. | ↵ |
| 084495     | 0.086701 | 0.086782 | 0.083672 | 0.082724 | 0.081119 | 0.083515 | 0.085330 | 0.024052 | 0.018555 | 0.018526 | 0. | ↵ |
| 014888     | 0.000000 | 0.001315 | 0.003494 | 0.006905 | 0.097438 | 0.106980 | 0.093546 | 0.086841 | 0.053718 | 0.054463 | 0. | ↵ |
| 054220     | 0.056221 | 0.049116 | 0.053495 |          |          |          |          |          |          |          |    |   |
| D89090.1_S | 0.136078 | 0.140380 | 0.138559 | 0.135414 | 0.130456 | 0.136129 | 0.142341 | 0.135127 | 0.135521 | 0.075576 | ↵  |   |
| 0.075360   | 0.075413 | 0.075307 | 0.075413 | 0.069049 | 0.068251 | 0.068573 | 0.068047 | 0.067895 | 0.081257 | 0.081580 | 0. | ↵ |
| 081354     | 0.081110 | 0.081211 | 0.081475 | 0.081469 | 0.081475 | 0.081481 | 0.081508 | 0.084403 | 0.086177 | 0.083952 | 0. | ↵ |
| 084925     | 0.087131 | 0.087212 | 0.084102 | 0.083154 | 0.081549 | 0.083945 | 0.085760 | 0.023171 | 0.018985 | 0.017645 | 0. | ↵ |
| 014892     | 0.001315 | 0.000000 | 0.003064 | 0.005712 | 0.098753 | 0.108295 | 0.094861 | 0.088156 | 0.052837 | 0.053582 | 0. | ↵ |
| 053339     | 0.055340 | 0.048235 | 0.052614 |          |          |          |          |          |          |          |    |   |
| D89089.1_S | 0.133332 | 0.137634 | 0.135813 | 0.132668 | 0.127710 | 0.133383 | 0.139595 | 0.132381 | 0.132775 | 0.072830 | ↵  |   |
| 0.072614   | 0.072667 | 0.072561 | 0.072667 | 0.066303 | 0.065505 | 0.065827 | 0.065301 | 0.065149 | 0.081776 | 0.082099 | 0. | ↵ |
| 081873     | 0.081629 | 0.081730 | 0.081994 | 0.081988 | 0.081994 | 0.082000 | 0.082027 | 0.087467 | 0.089241 | 0.087016 | 0. | ↵ |
| 087989     | 0.090195 | 0.090276 | 0.087166 | 0.086218 | 0.084613 | 0.087009 | 0.088824 | 0.025917 | 0.022049 | 0.020391 | 0. | ↵ |
| 015092     | 0.003494 | 0.003064 | 0.000000 | 0.005071 | 0.099272 | 0.108814 | 0.095380 | 0.088675 | 0.055583 | 0.056328 | 0. | ↵ |
| 056085     | 0.058086 | 0.050981 | 0.055360 |          |          |          |          |          |          |          |    |   |
| D89091.1_S | 0.133501 | 0.137803 | 0.135982 | 0.132837 | 0.127879 | 0.133552 | 0.139764 | 0.132550 | 0.132944 | 0.072999 | ↵  |   |
| 0.072783   | 0.072836 | 0.072730 | 0.072836 | 0.066472 | 0.065674 | 0.065996 | 0.065470 | 0.065318 | 0.086847 | 0.087170 | 0. | ↵ |
| 086944     | 0.086700 | 0.086801 | 0.087065 | 0.087059 | 0.087065 | 0.087071 | 0.087098 | 0.090115 | 0.091889 | 0.089664 | 0. | ↵ |
| 090637     | 0.092843 | 0.092924 | 0.089814 | 0.088866 | 0.087261 | 0.089657 | 0.091472 | 0.025748 | 0.024697 | 0.020222 | 0. | ↵ |
| 017347     | 0.006905 | 0.005712 | 0.005071 | 0.000000 | 0.104343 | 0.113885 | 0.100451 | 0.093746 | 0.055414 | 0.056159 | 0. | ↵ |
| 055916     | 0.057917 | 0.050812 | 0.055191 |          |          |          |          |          |          |          |    |   |
| MF185111.1 | 0.132922 | 0.127478 | 0.128551 | 0.127423 | 0.138102 | 0.126022 | 0.122881 | 0.144956 | 0.148007 | 0.062766 | ↵  |   |
| 0.063313   | 0.063366 | 0.063313 | 0.063366 | 0.062156 | 0.061645 | 0.062050 | 0.061775 | 0.061746 | 0.035506 | 0.035425 | 0. | ↵ |
| 035695     | 0.035583 | 0.035583 | 0.035451 | 0.035308 | 0.035417 | 0.035402 | 0.035417 | 0.141357 | 0.141388 | 0.134573 | 0. | ↵ |
| 138884     | 0.137962 | 0.143952 | 0.140152 | 0.137332 | 0.139483 | 0.141623 | 0.139161 | 0.109463 | 0.103564 | 0.114380 | 0. | ↵ |
| 094411     | 0.097438 | 0.098753 | 0.099272 | 0.104343 | 0.000000 | 0.027248 | 0.012465 | 0.016545 | 0.129671 | 0.131608 | 0. | ↵ |
| 130597     | 0.130460 | 0.131331 | 0.129122 |          |          |          |          |          |          |          |    |   |
| MF185115.1 | 0.160170 | 0.154726 | 0.155799 | 0.154671 | 0.165350 | 0.153270 | 0.150129 | 0.172204 | 0.175255 | 0.076018 | ↵  |   |
| 0.074395   | 0.074237 | 0.074342 | 0.074395 | 0.055702 | 0.055503 | 0.055225 | 0.055156 | 0.055746 | 0.047602 | 0.047584 | 0. | ↵ |
| 047553     | 0.047562 | 0.047461 | 0.047592 | 0.047599 | 0.047559 | 0.047572 | 0.047525 | 0.168605 | 0.168636 | 0.161821 | 0. | ↵ |
| 166132     | 0.165210 | 0.171200 | 0.167400 | 0.164580 | 0.166731 | 0.168871 | 0.166409 | 0.119005 | 0.113106 | 0.123922 | 0. | ↵ |
| 103953     | 0.106980 | 0.108295 | 0.108814 | 0.113885 | 0.027248 | 0.000000 | 0.039713 | 0.020139 | 0.139213 | 0.141150 | 0. | ↵ |
| 140139     | 0.140002 | 0.140873 | 0.138664 |          |          |          |          |          |          |          |    |   |
| MF185117.1 | 0.120456 | 0.115012 | 0.116085 | 0.114957 | 0.125636 | 0.113556 | 0.116647 | 0.132490 | 0.135541 | 0.069410 | ↵  |   |
| 0.069957   | 0.070010 | 0.069957 | 0.070010 | 0.068800 | 0.068289 | 0.068694 | 0.068419 | 0.068390 | 0.039291 | 0.038907 | 0. | ↵ |
| 039434     | 0.039556 | 0.039556 | 0.039029 | 0.038884 | 0.039029 | 0.038994 | 0.039029 | 0.128891 | 0.128922 | 0.122107 | 0. | ↵ |
| 126418     | 0.125496 | 0.131486 | 0.127686 | 0.124866 | 0.127017 | 0.129157 | 0.126695 | 0.105571 | 0.099672 | 0.110488 | 0. | ↵ |
| 090519     | 0.093546 | 0.094861 | 0.095380 | 0.100451 | 0.012465 | 0.039713 | 0.000000 | 0.023033 | 0.125779 | 0.127716 | 0. | ↵ |
| 126705     | 0.126568 | 0.127439 | 0.125230 |          |          |          |          |          |          |          |    |   |
| MF185119.1 | 0.143490 | 0.138046 | 0.139119 | 0.137991 | 0.148670 | 0.136590 | 0.135121 | 0.155524 | 0.158575 | 0.068356 | ↵  |   |
| 0.068140   | 0.068193 | 0.068087 | 0.068193 | 0.061829 | 0.061031 | 0.061353 | 0.060827 | 0.060675 | 0.052051 | 0.051970 | 0. | ↵ |
| 052240     | 0.052128 | 0.052128 | 0.051996 | 0.051853 | 0.051962 | 0.051947 | 0.051962 | 0.151925 | 0.151956 | 0.145141 | 0. | ↵ |
| 149452     | 0.148530 | 0.154520 | 0.150720 | 0.147900 | 0.150051 | 0.152191 | 0.149729 | 0.098866 | 0.092967 | 0.103783 | 0. | ↵ |
| 083814     | 0.086841 | 0.088156 | 0.088675 | 0.093746 | 0.016545 | 0.020139 | 0.023033 | 0.000000 | 0.119074 | 0.121011 | 0. | ↵ |
| 120000     | 0.119863 | 0.120734 | 0.118525 |          |          |          |          |          |          |          |    |   |
| KY486224.1 | 0.188915 | 0.193217 | 0.191396 | 0.188251 | 0.183293 | 0.188966 | 0.195178 | 0.187964 | 0.188358 | 0.128413 | ↵  |   |
| 0.128197   | 0.128250 | 0.128144 | 0.128250 | 0.121886 | 0.121088 | 0.121410 | 0.120884 | 0.120732 | 0.112175 | 0.112498 | 0. | ↵ |
| 112297     | 0.112185 | 0.112185 | 0.112393 | 0.112387 | 0.112393 | 0.112399 | 0.112426 | 0.084805 | 0.084836 | 0.078021 | 0. | ↵ |

|            |          |          |          |          |          |          |          |          |          |          |          |    |   |
|------------|----------|----------|----------|----------|----------|----------|----------|----------|----------|----------|----------|----|---|
| 082332     | 0.081410 | 0.087400 | 0.083600 | 0.080780 | 0.082931 | 0.085071 | 0.082609 | 0.029666 | 0.035476 | 0.035192 | 0.       | ↗  |   |
| 044168     | 0.053718 | 0.052837 | 0.055583 | 0.055414 | 0.129671 | 0.139213 | 0.125779 | 0.119074 | 0.000000 | 0.002471 | 0.       | ↗  |   |
| 001370     | 0.002706 | 0.007842 | 0.000938 |          |          |          |          |          |          |          |          |    |   |
| KY486226.1 | 0.189660 | 0.193962 | 0.192141 | 0.188996 | 0.184038 | 0.189711 | 0.195923 | 0.188709 | 0.189103 | 0.129158 |          | ↗  |   |
|            | 0.128942 | 0.128995 | 0.128889 | 0.128995 | 0.122631 | 0.121833 | 0.122155 | 0.121629 | 0.121477 | 0.114112 | 0.114435 | 0. | ↗ |
| 114209     | 0.113965 | 0.114066 | 0.114330 | 0.114324 | 0.114330 | 0.114336 | 0.114363 | 0.086083 | 0.086114 | 0.079704 | 0.       | ↗  |   |
| 083610     | 0.082883 | 0.088678 | 0.084878 | 0.082058 | 0.084209 | 0.086349 | 0.083887 | 0.030411 | 0.036221 | 0.035937 | 0.       | ↗  |   |
| 044913     | 0.054463 | 0.053582 | 0.056328 | 0.056159 | 0.131608 | 0.141150 | 0.127716 | 0.121011 | 0.002471 | 0.000000 | 0.       | ↗  |   |
| 001100     | 0.001758 | 0.005371 | 0.002486 |          |          |          |          |          |          |          |          |    |   |
| KY486227.1 | 0.189417 | 0.193719 | 0.191898 | 0.188753 | 0.183795 | 0.189468 | 0.195680 | 0.188466 | 0.188860 | 0.128915 |          | ↗  |   |
|            | 0.128699 | 0.128752 | 0.128646 | 0.128752 | 0.122388 | 0.121590 | 0.121912 | 0.121386 | 0.121234 | 0.113101 | 0.113424 | 0. | ↗ |
| 113198     | 0.112954 | 0.113055 | 0.113319 | 0.113313 | 0.113319 | 0.113325 | 0.113352 | 0.085750 | 0.085781 | 0.078966 | 0.       | ↗  |   |
| 083277     | 0.082355 | 0.088345 | 0.084545 | 0.081725 | 0.083876 | 0.086016 | 0.083554 | 0.030168 | 0.035978 | 0.035694 | 0.       | ↗  |   |
| 044670     | 0.054220 | 0.053339 | 0.056085 | 0.055916 | 0.130597 | 0.140139 | 0.126705 | 0.120000 | 0.001370 | 0.001100 | 0.       | ↗  |   |
| 000000     | 0.002001 | 0.006471 | 0.001475 |          |          |          |          |          |          |          |          |    |   |
| KY486214.1 | 0.191418 | 0.195720 | 0.193899 | 0.190754 | 0.185796 | 0.191469 | 0.197681 | 0.190467 | 0.190861 | 0.130916 |          | ↗  |   |
|            | 0.130700 | 0.130753 | 0.130647 | 0.130753 | 0.124389 | 0.123591 | 0.123913 | 0.123387 | 0.123235 | 0.114611 | 0.114530 | 0. | ↗ |
| 114800     | 0.114688 | 0.114688 | 0.114556 | 0.114413 | 0.114522 | 0.114507 | 0.114522 | 0.087511 | 0.087542 | 0.080727 | 0.       | ↗  |   |
| 085038     | 0.084116 | 0.090106 | 0.086306 | 0.083486 | 0.085637 | 0.087777 | 0.085315 | 0.032169 | 0.037979 | 0.037695 | 0.       | ↗  |   |
| 046671     | 0.056221 | 0.055340 | 0.058086 | 0.057917 | 0.130460 | 0.140002 | 0.126568 | 0.119863 | 0.002706 | 0.001758 | 0.       | ↗  |   |
| 002001     | 0.000000 | 0.007105 | 0.002726 |          |          |          |          |          |          |          |          |    |   |
| KY486215.1 | 0.184313 | 0.188615 | 0.186794 | 0.183649 | 0.178691 | 0.184364 | 0.190576 | 0.183362 | 0.183756 | 0.123811 |          | ↗  |   |
|            | 0.123595 | 0.123648 | 0.123542 | 0.123648 | 0.117284 | 0.116486 | 0.116808 | 0.116282 | 0.116130 | 0.113835 | 0.114158 | 0. | ↗ |
| 113932     | 0.113688 | 0.113789 | 0.114053 | 0.114047 | 0.114053 | 0.114059 | 0.114086 | 0.086384 | 0.087300 | 0.085075 | 0.       | ↗  |   |
| 086048     | 0.088254 | 0.088979 | 0.085225 | 0.084277 | 0.084510 | 0.086650 | 0.086883 | 0.025064 | 0.030874 | 0.030590 | 0.       | ↗  |   |
| 039566     | 0.049116 | 0.048235 | 0.050981 | 0.050812 | 0.131331 | 0.140873 | 0.127439 | 0.120734 | 0.007842 | 0.005371 | 0.       | ↗  |   |
| 006471     | 0.007105 | 0.000000 | 0.007228 |          |          |          |          |          |          |          |          |    |   |
| KY486216.1 | 0.188692 | 0.192994 | 0.191173 | 0.188028 | 0.183070 | 0.188743 | 0.194955 | 0.187741 | 0.188135 | 0.128190 |          | ↗  |   |
|            | 0.127974 | 0.128027 | 0.127921 | 0.128027 | 0.121663 | 0.120865 | 0.121187 | 0.120661 | 0.120509 | 0.111885 | 0.111949 | 0. | ↗ |
| 112074     | 0.111962 | 0.111962 | 0.111844 | 0.111838 | 0.111844 | 0.111850 | 0.111877 | 0.085743 | 0.085774 | 0.078959 | 0.       | ↗  |   |
| 083270     | 0.082348 | 0.088338 | 0.084538 | 0.081718 | 0.083869 | 0.086009 | 0.083547 | 0.029443 | 0.035253 | 0.034969 | 0.       | ↗  |   |
| 043945     | 0.053495 | 0.052614 | 0.055360 | 0.055191 | 0.129122 | 0.138664 | 0.125230 | 0.118525 | 0.000938 | 0.002486 | 0.       | ↗  |   |
| 001475     | 0.002726 | 0.007228 | 0.000000 |          |          |          |          |          |          |          |          |    |   |

29 Escherichia/Shigella complete genomes

29

|            |          |          |          |          |          |          |          |          |          |          |          |    |   |
|------------|----------|----------|----------|----------|----------|----------|----------|----------|----------|----------|----------|----|---|
| CU928160.2 | 0.000000 | 0.000349 | 0.001084 | 0.002022 | 0.003423 | 0.004214 | 0.000763 | 0.000735 | 0.000732 | 0.001564 |          | ↗  |   |
|            | 0.000291 | 0.000415 | 0.000948 | 0.000526 | 0.000456 | 0.003017 | 0.002095 | 0.002243 | 0.002541 | 0.000838 | 0.001394 | 0. | ↗ |
| 001776     | 0.002060 | 0.001519 | 0.000868 | 0.002069 | 0.001145 | 0.001417 | 0.001736 |          |          |          |          |    |   |
| AP009240.1 | 0.000349 | 0.000000 | 0.001433 | 0.002141 | 0.003542 | 0.004333 | 0.001020 | 0.001055 | 0.001052 | 0.001683 |          | ↗  |   |
|            | 0.000538 | 0.000563 | 0.001067 | 0.000674 | 0.000604 | 0.002736 | 0.002243 | 0.002391 | 0.002689 | 0.000986 | 0.001275 | 0. | ↗ |
| 001924     | 0.002208 | 0.001602 | 0.000749 | 0.002217 | 0.001293 | 0.001272 | 0.001884 |          |          |          |          |    |   |
| CP000800.1 | 0.001084 | 0.001433 | 0.000000 | 0.002730 | 0.004131 | 0.004922 | 0.001625 | 0.001472 | 0.001744 | 0.002272 |          | ↗  |   |
|            | 0.001126 | 0.001207 | 0.001656 | 0.001218 | 0.001134 | 0.004101 | 0.001082 | 0.001230 | 0.001528 | 0.000772 | 0.000774 | 0. | ↗ |
| 000880     | 0.001047 | 0.000872 | 0.001282 | 0.001056 | 0.000843 | 0.000780 | 0.000953 |          |          |          |          |    |   |
| CP000038.1 | 0.002022 | 0.002141 | 0.002730 | 0.000000 | 0.001401 | 0.002388 | 0.001258 | 0.001352 | 0.001795 | 0.001203 |          | ↗  |   |
|            | 0.001731 | 0.001636 | 0.001405 | 0.001619 | 0.001596 | 0.002746 | 0.002957 | 0.003252 | 0.002679 | 0.001957 | 0.003416 | 0. | ↗ |
| 003216     | 0.002310 | 0.003541 | 0.002890 | 0.003116 | 0.002004 | 0.002793 | 0.002739 |          |          |          |          |    |   |
| CP000036.1 | 0.003423 | 0.003542 | 0.004131 | 0.001401 | 0.000000 | 0.001251 | 0.002659 | 0.002753 | 0.003196 | 0.002097 |          | ↗  |   |
|            | 0.003132 | 0.003037 | 0.002475 | 0.003020 | 0.002997 | 0.002115 | 0.004094 | 0.004653 | 0.003623 | 0.003358 | 0.004817 | 0. | ↗ |
| 004617     | 0.003639 | 0.004942 | 0.004291 | 0.004517 | 0.003405 | 0.004194 | 0.004140 |          |          |          |          |    |   |
| CP001063.1 | 0.004214 | 0.004333 | 0.004922 | 0.002388 | 0.001251 | 0.000000 | 0.003450 | 0.003544 | 0.003987 | 0.002650 |          | ↗  |   |
|            | 0.003923 | 0.003828 | 0.003266 | 0.003811 | 0.003788 | 0.002538 | 0.005345 | 0.005444 | 0.004874 | 0.004149 | 0.005608 | 0. | ↗ |
| 005408     | 0.004698 | 0.005733 | 0.005082 | 0.005308 | 0.004196 | 0.004985 | 0.004931 |          |          |          |          |    |   |
| CP000266.1 | 0.000763 | 0.001020 | 0.001625 | 0.001258 | 0.002659 | 0.003450 | 0.000000 | 0.000153 | 0.000536 | 0.001313 |          | ↗  |   |
|            | 0.000508 | 0.000892 | 0.001366 | 0.001003 | 0.000933 | 0.002476 | 0.002572 | 0.002720 | 0.003018 | 0.001315 | 0.002157 | 0. | ↗ |
| 002253     | 0.002537 | 0.002282 | 0.001631 | 0.002546 | 0.001622 | 0.002117 | 0.002290 |          |          |          |          |    |   |
| AE014073.1 | 0.000735 | 0.001055 | 0.001472 | 0.001352 | 0.002753 | 0.003544 | 0.000153 | 0.000000 | 0.000443 | 0.001288 |          | ↗  |   |
|            | 0.000517 | 0.000888 | 0.001341 | 0.000993 | 0.000908 | 0.002629 | 0.002547 | 0.002695 | 0.002993 | 0.001290 | 0.002064 | 0. | ↗ |
| 002252     | 0.002512 | 0.002244 | 0.001538 | 0.002521 | 0.001622 | 0.002152 | 0.002325 |          |          |          |          |    |   |

|            |          |          |          |          |          |          |          |          |          |          |     |
|------------|----------|----------|----------|----------|----------|----------|----------|----------|----------|----------|-----|
| AE005674.2 | 0.000732 | 0.001052 | 0.001744 | 0.001795 | 0.003196 | 0.003987 | 0.000536 | 0.000443 | 0.000000 | 0.001568 | ↕   |
| 0.000763   | 0.001147 | 0.001621 | 0.001258 | 0.001188 | 0.002791 | 0.002827 | 0.002975 | 0.003273 | 0.001570 | 0.001621 | 0.↕ |
| 002508     | 0.002792 | 0.002241 | 0.001095 | 0.002801 | 0.001877 | 0.002149 | 0.002468 |          |          |          |     |
| CP000946.1 | 0.001564 | 0.001683 | 0.002272 | 0.001203 | 0.002097 | 0.002650 | 0.001313 | 0.001288 | 0.001568 | 0.000000 | ↕   |
| 0.001273   | 0.001178 | 0.000616 | 0.001161 | 0.001138 | 0.003720 | 0.002728 | 0.002794 | 0.002257 | 0.001499 | 0.002958 | 0.↕ |
| 002758     | 0.002081 | 0.003083 | 0.002432 | 0.002686 | 0.001546 | 0.002335 | 0.002281 |          |          |          |     |
| CP000802.1 | 0.000291 | 0.000538 | 0.001126 | 0.001731 | 0.003132 | 0.003923 | 0.000508 | 0.000517 | 0.000763 | 0.001273 | ↕   |
| 0.000000   | 0.000384 | 0.000858 | 0.000495 | 0.000425 | 0.002975 | 0.002064 | 0.002212 | 0.002510 | 0.000807 | 0.001685 | 0.↕ |
| 001745     | 0.002029 | 0.001810 | 0.001159 | 0.002038 | 0.001114 | 0.001635 | 0.001808 |          |          |          |     |
| U00096.3_E | 0.000415 | 0.000563 | 0.001207 | 0.001636 | 0.003037 | 0.003828 | 0.000892 | 0.000888 | 0.001147 | 0.001178 | ↕   |
| 0.000384   | 0.000000 | 0.000562 | 0.000110 | 0.000230 | 0.003299 | 0.001892 | 0.001936 | 0.002125 | 0.000621 | 0.001780 | 0.↕ |
| 001580     | 0.001644 | 0.001905 | 0.001254 | 0.001850 | 0.000734 | 0.001264 | 0.001437 |          |          |          |     |
| AP000948.1 | 0.000948 | 0.001067 | 0.001656 | 0.001405 | 0.002475 | 0.003266 | 0.001366 | 0.001341 | 0.001621 | 0.000616 | ↕   |
| 0.000858   | 0.000562 | 0.000000 | 0.000545 | 0.000599 | 0.003773 | 0.002261 | 0.002305 | 0.001790 | 0.000990 | 0.002342 | 0.↕ |
| 002142     | 0.001614 | 0.002467 | 0.001816 | 0.002219 | 0.000930 | 0.001719 | 0.001665 |          |          |          |     |
| CP000948.1 | 0.000526 | 0.000674 | 0.001218 | 0.001619 | 0.003020 | 0.003811 | 0.001003 | 0.000993 | 0.001258 | 0.001161 | ↕   |
| 0.000495   | 0.000110 | 0.000545 | 0.000000 | 0.000335 | 0.003410 | 0.001903 | 0.001947 | 0.002015 | 0.000632 | 0.001797 | 0.↕ |
| 001597     | 0.001534 | 0.001922 | 0.001271 | 0.001861 | 0.000629 | 0.001174 | 0.001332 |          |          |          |     |
| CP001396.1 | 0.000456 | 0.000604 | 0.001134 | 0.001596 | 0.002997 | 0.003788 | 0.000933 | 0.000908 | 0.001188 | 0.001138 | ↕   |
| 0.000425   | 0.000230 | 0.000599 | 0.000335 | 0.000000 | 0.003340 | 0.001662 | 0.001787 | 0.002085 | 0.000391 | 0.001820 | 0.↕ |
| 001620     | 0.001604 | 0.001945 | 0.001294 | 0.001620 | 0.000964 | 0.001494 | 0.001667 |          |          |          |     |
| CP000034.1 | 0.003017 | 0.002736 | 0.004101 | 0.002746 | 0.002115 | 0.002538 | 0.002476 | 0.002629 | 0.002791 | 0.003720 | ↕   |
| 0.002975   | 0.003299 | 0.003773 | 0.003410 | 0.003340 | 0.000000 | 0.004979 | 0.005127 | 0.005425 | 0.003722 | 0.003777 | 0.↕ |
| 004660     | 0.004944 | 0.004270 | 0.003256 | 0.004953 | 0.004029 | 0.004008 | 0.004620 |          |          |          |     |
| CP001846.1 | 0.002095 | 0.002243 | 0.001082 | 0.002957 | 0.004094 | 0.005345 | 0.002572 | 0.002547 | 0.002827 | 0.002728 | ↕   |
| 0.002064   | 0.001892 | 0.002261 | 0.001903 | 0.001662 | 0.004979 | 0.000000 | 0.000723 | 0.000585 | 0.001271 | 0.001857 | 0.↕ |
| 000583     | 0.000647 | 0.000908 | 0.002365 | 0.000500 | 0.001528 | 0.001291 | 0.000907 |          |          |          |     |
| AE005174.2 | 0.002243 | 0.002391 | 0.001230 | 0.003252 | 0.004653 | 0.005444 | 0.002720 | 0.002695 | 0.002975 | 0.002794 | ↕   |
| 0.002212   | 0.001936 | 0.002305 | 0.001947 | 0.001787 | 0.005127 | 0.000723 | 0.000000 | 0.001204 | 0.001405 | 0.002005 | 0.↕ |
| 000467     | 0.001014 | 0.001000 | 0.002513 | 0.000223 | 0.001572 | 0.001335 | 0.000951 |          |          |          |     |
| BA000007.2 | 0.002541 | 0.002689 | 0.001528 | 0.002679 | 0.003623 | 0.004874 | 0.003018 | 0.002993 | 0.003273 | 0.002257 | ↕   |
| 0.002510   | 0.002125 | 0.001790 | 0.002015 | 0.002085 | 0.005425 | 0.000585 | 0.001204 | 0.000000 | 0.001703 | 0.002303 | 0.↕ |
| 001168     | 0.000481 | 0.001493 | 0.002811 | 0.001068 | 0.001396 | 0.001417 | 0.000805 |          |          |          |     |
| CU928163.2 | 0.000838 | 0.000986 | 0.000772 | 0.001957 | 0.003358 | 0.004149 | 0.001315 | 0.001290 | 0.001570 | 0.001499 | ↕   |
| 0.000807   | 0.000621 | 0.000990 | 0.000632 | 0.000391 | 0.003722 | 0.001271 | 0.001405 | 0.001703 | 0.000000 | 0.001458 | 0.↕ |
| 001258     | 0.001222 | 0.001583 | 0.001108 | 0.001231 | 0.000611 | 0.001141 | 0.001314 |          |          |          |     |
| CU928164.2 | 0.001394 | 0.001275 | 0.000774 | 0.003416 | 0.004817 | 0.005608 | 0.002157 | 0.002064 | 0.001621 | 0.002958 | ↕   |
| 0.001685   | 0.001780 | 0.002342 | 0.001797 | 0.001820 | 0.003777 | 0.001857 | 0.002005 | 0.002303 | 0.001458 | 0.000000 | 0.↕ |
| 001538     | 0.001822 | 0.001005 | 0.000526 | 0.001831 | 0.001412 | 0.000886 | 0.001498 |          |          |          |     |
| CP000970.1 | 0.001776 | 0.001924 | 0.000880 | 0.003216 | 0.004617 | 0.005408 | 0.002253 | 0.002252 | 0.002508 | 0.002758 | ↕   |
| 0.001745   | 0.001580 | 0.002142 | 0.001597 | 0.001620 | 0.004660 | 0.000583 | 0.000467 | 0.001168 | 0.001258 | 0.001538 | 0.↕ |
| 000000     | 0.000978 | 0.000533 | 0.002046 | 0.000293 | 0.001212 | 0.000975 | 0.000591 |          |          |          |     |
| FM180568.1 | 0.002060 | 0.002208 | 0.001047 | 0.002310 | 0.003639 | 0.004698 | 0.002537 | 0.002512 | 0.002792 | 0.002081 | ↕   |
| 0.002029   | 0.001644 | 0.001614 | 0.001534 | 0.001604 | 0.004944 | 0.000647 | 0.001014 | 0.000481 | 0.001222 | 0.001822 | 0.↕ |
| 000978     | 0.000000 | 0.001303 | 0.002330 | 0.000878 | 0.000915 | 0.000936 | 0.000501 |          |          |          |     |
| CP000247.1 | 0.001519 | 0.001602 | 0.000872 | 0.003541 | 0.004942 | 0.005733 | 0.002282 | 0.002244 | 0.002241 | 0.003083 | ↕   |
| 0.001810   | 0.001905 | 0.002467 | 0.001922 | 0.001945 | 0.004270 | 0.000908 | 0.001000 | 0.001493 | 0.001583 | 0.001005 | 0.↕ |
| 000533     | 0.001303 | 0.000000 | 0.001513 | 0.000826 | 0.001537 | 0.000775 | 0.000802 |          |          |          |     |
| CU928162.2 | 0.000868 | 0.000749 | 0.001282 | 0.002890 | 0.004291 | 0.005082 | 0.001631 | 0.001538 | 0.001095 | 0.002432 | ↕   |
| 0.001159   | 0.001254 | 0.001816 | 0.001271 | 0.001294 | 0.003256 | 0.002365 | 0.002513 | 0.002811 | 0.001108 | 0.000526 | 0.↕ |
| 002046     | 0.002330 | 0.001513 | 0.000000 | 0.002339 | 0.001415 | 0.001394 | 0.002006 |          |          |          |     |
| AE014075.1 | 0.002069 | 0.002217 | 0.001056 | 0.003116 | 0.004517 | 0.005308 | 0.002546 | 0.002521 | 0.002801 | 0.002686 | ↕   |
| 0.002038   | 0.001850 | 0.002219 | 0.001861 | 0.001620 | 0.004953 | 0.000500 | 0.000223 | 0.001068 | 0.001231 | 0.001831 | 0.↕ |
| 000293     | 0.000878 | 0.000826 | 0.002339 | 0.000000 | 0.001486 | 0.001249 | 0.000865 |          |          |          |     |
| CU928161.2 | 0.001145 | 0.001293 | 0.000843 | 0.002004 | 0.003405 | 0.004196 | 0.001622 | 0.001622 | 0.001877 | 0.001546 | ↕   |
| 0.001114   | 0.000734 | 0.000930 | 0.000629 | 0.000964 | 0.004029 | 0.001528 | 0.001572 | 0.001396 | 0.000611 | 0.001412 | 0.↕ |
| 001212     | 0.000915 | 0.001537 | 0.001415 | 0.001486 | 0.000000 | 0.000789 | 0.000735 |          |          |          |     |
| CP000243.1 | 0.001417 | 0.001272 | 0.000780 | 0.002793 | 0.004194 | 0.004985 | 0.002117 | 0.002152 | 0.002149 | 0.002335 | ↕   |
| 0.001635   | 0.001264 | 0.001719 | 0.001174 | 0.001494 | 0.004008 | 0.001291 | 0.001335 | 0.001417 | 0.001141 | 0.000886 | 0.↕ |
| 000975     | 0.000936 | 0.000775 | 0.001394 | 0.001249 | 0.000789 | 0.000000 | 0.000612 |          |          |          |     |
| CP000468.1 | 0.001736 | 0.001884 | 0.000953 | 0.002739 | 0.004140 | 0.004931 | 0.002290 | 0.002325 | 0.002468 | 0.002281 | ↕   |
| 0.001808   | 0.001437 | 0.001665 | 0.001332 | 0.001667 | 0.004620 | 0.000907 | 0.000951 | 0.000805 | 0.001314 | 0.001498 | 0.↕ |

---

000591 0.000501 0.000802 0.002006 0.000865 0.000735 0.000612 0.000000

9 mammalian X chromosomes

9

|            |          |          |          |          |          |          |          |          |          |
|------------|----------|----------|----------|----------|----------|----------|----------|----------|----------|
| Human_X_ch | 0.000000 | 0.000923 | 0.001189 | 0.004122 | 0.002227 | 0.001907 | 0.008808 | 0.017529 | 0.001013 |
| Monkey_X_c | 0.000923 | 0.000000 | 0.000292 | 0.004501 | 0.001534 | 0.001289 | 0.009187 | 0.018147 | 0.000093 |
| Gorilla_X_ | 0.001189 | 0.000292 | 0.000000 | 0.004651 | 0.001358 | 0.000997 | 0.009337 | 0.018439 | 0.000321 |
| Dog_X_chro | 0.004122 | 0.004501 | 0.004651 | 0.000000 | 0.005881 | 0.005227 | 0.004686 | 0.014329 | 0.004594 |
| Horse_X_ch | 0.002227 | 0.001534 | 0.001358 | 0.005881 | 0.000000 | 0.000953 | 0.010567 | 0.019604 | 0.001560 |
| Mouse_X_ch | 0.001907 | 0.001289 | 0.000997 | 0.005227 | 0.000953 | 0.000000 | 0.009614 | 0.019436 | 0.001318 |
| Opossum_X_ | 0.008808 | 0.009187 | 0.009337 | 0.004686 | 0.010567 | 0.009614 | 0.000000 | 0.011243 | 0.009280 |
| Platypus_X | 0.017529 | 0.018147 | 0.018439 | 0.014329 | 0.019604 | 0.019436 | 0.011243 | 0.000000 | 0.018118 |
| Chimpanzee | 0.001013 | 0.000093 | 0.000321 | 0.004594 | 0.001560 | 0.001318 | 0.009280 | 0.018118 | 0.000000 |

---
